# Supplementary material for: The Proneural Molecular Signature Is Enriched in Oligodendrogliomas and Predicts Improved Survival among Diffuse Gliomas
Source: PubMed Central journal article supplement (PMC2933229; doi:10.1371/journal.pone.0012548), 2010-09-03
Supplement: pone.0012548.s002.pdf [file pone.0012548.s002.pdf]

| name   | time | status | cls.PAM     | Disease     | Grade | Age at Dx (years) | 1p/19q deleted |
|--------|------|--------|-------------|-------------|-------|-------------------|----------------|
| HF1232 | 21   | 1      | Classic     | ASTROCYTOMA | III   | 50-54             | No             |
| HF1139 | 15   | 1      | Classic     | ASTROCYTOMA | III   | 40-44             | No             |
| E09826 | 21   | 1      | Classic     | ASTROCYTOMA | --    | 40-44             | No             |
| E09334 | 60   | 0      | Mesenchymal | ASTROCYTOMA | --    | 40-44             | N.D.           |
| E09800 | 21   | 1      | Mesenchymal | ASTROCYTOMA | --    | 65-69             | No             |
| E10003 | 11   | 1      | Mesenchymal | ASTROCYTOMA | --    | 60-64             | No             |
| HF0757 | 60   | 0      | Mesenchymal | ASTROCYTOMA | II    | 40-44             | No             |
| HF1246 | 1    | 1      | Mesenchymal | ASTROCYTOMA | II    | 65-69             | No             |
| HF0450 | 27   | 1      | Neural      | ASTROCYTOMA | III   | 30-34             | No             |
| E09471 | 27   | 1      | Neural      | ASTROCYTOMA | --    | 70-74             | No             |
| HF1708 | 60   | 0      | Neural      | ASTROCYTOMA | II    | 20-24             | No             |
| HF0223 | 45   | 1      | Neural      | ASTROCYTOMA | III   | 45-49             | No             |
| HF1032 | 27   | 1      | Neural      | ASTROCYTOMA | III   | 40-44             | No             |
| HF1469 | 21   | 1      | Neural      | ASTROCYTOMA | III   | 45-49             | No             |
| HF0778 | 8    | 1      | Neural      | ASTROCYTOMA | III   | 65-69             | No             |
| HF1581 | 1    | 1      | Neural      | ASTROCYTOMA | III   | 65-69             | No             |
| HF1407 | 6    | 1      | Proneural   | ASTROCYTOMA | III   | 55-59             | No             |
| HF0152 | 60   | 0      | Proneural   | ASTROCYTOMA | III   | 30-34             | No             |
| HF1487 | 11   | 1      | Proneural   | ASTROCYTOMA | III   | 60-64             | No             |
| E09394 | 54   | 1      | Proneural   | ASTROCYTOMA | --    | 35-39             | N.D.           |
| E07733 | 54   | 1      | Proneural   | ASTROCYTOMA | --    | 50-54             | No             |
| HF1511 | 54   | 1      | Proneural   | ASTROCYTOMA | II    | 25-29             | No             |
| HF1442 | 45   | 1      | Proneural   | ASTROCYTOMA | II    | 35-39             | No             |
| HF1568 | 39   | 1      | Proneural   | ASTROCYTOMA | II    | 30-34             | No             |
| HF0108 | 60   | 0      | Proneural   | ASTROCYTOMA | III   | 35-39             | No             |
| HF1587 | 60   | 0      | Proneural   | ASTROCYTOMA | III   | 30-34             | N.D.           |
| HF0017 | 60   | 0      | Proneural   | ASTROCYTOMA | III   | 45-49             | No             |
| HF0026 | 54   | 1      | Proneural   | ASTROCYTOMA | III   | 60-64             | No             |
| HF1000 | 39   | 1      | Proneural   | ASTROCYTOMA | III   | 30-34             | No             |
| HF1295 | 21   | 1      | Proneural   | ASTROCYTOMA | III   | 55-59             | No             |
| HF1269 | 15   | 1      | Proneural   | ASTROCYTOMA | III   | 45-49             | No             |
| HF1344 | 8    | 1      | Proneural   | ASTROCYTOMA | III   | 60-64             | No             |
| E09833 | 21   | 1      | Classic     | GBM         | IV    | 50-54             | No             |
| E09167 | 15   | 1      | Classic     | GBM         | IV    | 65-69             | No             |
| E09704 | 11   | 1      | Classic     | GBM         | IV    | 50-54             | N.D.           |
| E09774 | 8    | 1      | Classic     | GBM         | IV    | 50-54             | No             |
| HF0990 | 60   | 0      | Classic     | GBM         | IV    | 40-44             | No             |
| HF1077 | 60   | 0      | Classic     | GBM         | IV    | 40-44             | No             |
| HF1382 | 45   | 1      | Classic     | GBM         | IV    | 60-64             | No             |
| HF1057 | 27   | 1      | Classic     | GBM         | IV    | 60-64             | No             |
| HF1628 | 15   | 1      | Classic     | GBM         | IV    | 45-49             | No             |
| HF0408 | 15   | 1      | Classic     | GBM         | IV    | 55-59             | No             |
| HF0894 | 15   | 1      | Classic     | GBM         | IV    | 55-59             | No             |
| HF0184 | 11   | 1      | Classic     | GBM         | IV    | 50-54             | No             |
| HF0066 | 11   | 1      | Classic     | GBM         | IV    | 55-59             | No             |
| HF1540 | 11   | 1      | Classic     | GBM         | IV    | 75-79             | No             |
| HF0627 | 11   | 1      | Classic     | GBM         | IV    | 45-49             | No             |
| HF1517 | 8    | 1      | Classic     | GBM         | IV    | 55-59             | No             |
| HF0702 | 8    | 1      | Classic     | GBM         | IV    | 50-54             | No             |
| HF1608 | 8    | 1      | Classic     | GBM         | IV    | 50-54             | No             |
| HF1458 | 8    | 1      | Classic     | GBM         | IV    | 45-49             | No             |
| HF1490 | 4    | 1      | Classic     | GBM         | IV    | 65-69             | No             |
| HF1589 | 4    | 1      | Classic     | GBM         | IV    | 65-69             | No             |
| HF1618 | 3    | 1      | Classic     | GBM         | IV    | 50-54             | No             |
| HF1509 | 3    | 1      | Classic     | GBM         | IV    | 55-59             | N.D.           |
| HF0138 | 2    | 1      | Classic     | GBM         | IV    | 75-79             | No             |
| HF0142 | 1    | 1      | Classic     | GBM         | IV    | 70-74             | N.D.           |
| HF1191 | 1    | 1      | Classic     | GBM         | IV    | 70-74             | No             |
| E09791 | 15   | 1      | Classic     | GBM         | IV    | 55-59             | No             |
| HF0316 | 60   | 0      | Classic     | GBM         | IV    | 40-44             | N.D.           |
| HF0986 | 60   | 0      | Classic     | GBM         | IV    | 35-39             | No             |
| HF0445 | 45   | 1      | Classic     | GBM         | IV    | 30-34             | No             |
| HF1397 | 27   | 1      | Classic     | GBM         | IV    | 60-64             | No             |
| HF1262 | 21   | 1      | Classic     | GBM         | IV    | 55-59             | No             |
| HF1137 | 21   | 1      | Classic     | GBM         | IV    | 70-74             | No             |
| HF1078 | 21   | 1      | Classic     | GBM         | IV    | 45-49             | N.D.           |
| HF1286 | 15   | 1      | Classic     | GBM         | IV    | 75-79             | No             |
| HF1178 | 15   | 1      | Classic     | GBM         | IV    | 70-74             | No             |
| HF0460 | 11   | 1      | Classic     | GBM         | IV    | 55-59             | No             |
| HF1538 | 4    | 1      | Classic     | GBM         | IV    | 70-74             | No             |
| HF1255 | 4    | 1      | Classic     | GBM         | IV    | 45-49             | No             |
| E09832 | 6    | 1      | Classic     | GBM         | IV    | 65-69             | No             |
| HF0268 | 21   | 1      | Classic     | GBM         | IV    | 45-49             | N.D.           |
| HF1409 | 15   | 1      | Classic     | GBM         | IV    | 50-54             | No             |
| E09938 | 27   | 1      | Mesenchymal | GBM         | IV    | 45-49             | N.D.           |
| E10016 | 27   | 1      | Mesenchymal | GBM         | IV    | 50-54             | N.D.           |
| E09511 | 15   | 1      | Mesenchymal | GBM         | IV    | 45-49             | No             |
| E09606 | 15   | 1      | Mesenchymal | GBM         | IV    | 50-54             | No             |
| E09649 | 11   | 1      | Mesenchymal | GBM         | IV    | 45-49             | No             |
| E09483 | 11   | 1      | Mesenchymal | GBM         | IV    | 45-49             | No             |
| E09654 | 8    | 1      | Mesenchymal | GBM         | IV    | 65-69             | N.D.           |
| E09451 | 6    | 1      | Mesenchymal | GBM         | IV    | 65-69             | No             |
| E09602 | 5    | 1      | Mesenchymal | GBM         | IV    | 65-69             | No             |
| HF0543 | 60   | 0      | Mesenchymal | GBM         | IV    | 50-54             | No             |
| HF1292 | 54   | 1      | Mesenchymal | GBM         | IV    | 45-49             | N.D.           |
| HF1585 | 21   | 1      | Mesenchymal | GBM         | IV    | 60-64             | No             |
| HF1356 | 15   | 1      | Mesenchymal | GBM         | IV    | 55-59             | No             |
| HF1280 | 15   | 1      | Mesenchymal | GBM         | IV    | 40-44             | No             |
| HF0583 | 15   | 1      | Mesenchymal | GBM         | IV    | 60-64             | No             |
| HF0608 | 11   | 1      | Mesenchymal | GBM         | IV    | 50-54             | No             |

|        |    |               |                   |     |       |      |
|--------|----|---------------|-------------------|-----|-------|------|
| HF1220 | 11 | 1 Mesenchymal | GBM               | IV  | 60-64 | No   |
| HF0520 | 8  | 1 Mesenchymal | GBM               | IV  | 60-64 | No   |
| HF1097 | 8  | 1 Mesenchymal | GBM               | IV  | 50-54 | No   |
| HF0790 | 8  | 1 Mesenchymal | GBM               | IV  | 70-74 | No   |
| HF0031 | 1  | 1 Mesenchymal | GBM               | IV  | 65-69 | No   |
| E09238 | 21 | 1 Neural      | GBM               | IV  | 45-49 | No   |
| HF0050 | 27 | 1 Neural      | GBM               | IV  | 50-54 | No   |
| HF0089 | 8  | 1 Neural      | GBM               | IV  | 65-69 | No   |
| E09531 | 21 | 1 Neural      | GBM               | IV  | 55-59 | No   |
| E09670 | 15 | 1 Neural      | GBM               | IV  | 70-74 | No   |
| HF0048 | 54 | 1 Neural      | GBM               | IV  | 30-34 | N.D. |
| HF1058 | 15 | 1 Neural      | GBM               | IV  | 50-54 | No   |
| HF1316 | 8  | 1 Neural      | GBM               | IV  | 70-74 | N.D. |
| HF1640 | 6  | 1 Neural      | GBM               | IV  | 65-69 | No   |
| HF0024 | 6  | 1 Neural      | GBM               | IV  | 75-79 | No   |
| HF0505 | 4  | 1 Neural      | GBM               | IV  | 75-79 | No   |
| HF1667 | 3  | 1 Neural      | GBM               | IV  | 65-69 | No   |
| HF0982 | 15 | 1 Proneural   | GBM               | IV  | 65-69 | No   |
| HF1534 | 8  | 1 Proneural   | GBM               | IV  | 55-59 | No   |
| HF1671 | 15 | 1 Proneural   | GBM               | IV  | 65-69 | No   |
| HF1122 | 8  | 1 Proneural   | GBM               | IV  | 35-39 | No   |
| E09852 | 45 | 1 Proneural   | GBM               | IV  | 45-49 | No   |
| E09965 | 21 | 1 Proneural   | GBM               | IV  | 40-44 | No   |
| HF0244 | 8  | 1 Proneural   | GBM               | IV  | 60-64 | No   |
| HF0936 | 5  | 1 Proneural   | GBM               | IV  | 55-59 | No   |
| E09802 | 33 | 1 Proneural   | GBM               | IV  | 60-64 | No   |
| E09647 | 21 | 1 Proneural   | GBM               | IV  | 70-74 | No   |
| E09998 | 2  | 1 Proneural   | GBM               | IV  | 60-64 | No   |
| HF1242 | 60 | 0 Proneural   | GBM               | IV  | 35-39 | No   |
| HF0996 | 60 | 0 Proneural   | GBM               | IV  | 50-54 | N.D. |
| HF0435 | 60 | 0 Proneural   | GBM               | IV  | 40-44 | No   |
| HF1494 | 33 | 1 Proneural   | GBM               | IV  | 30-34 | No   |
| HF1475 | 33 | 1 Proneural   | GBM               | IV  | 15-19 | N.D. |
| HF1357 | 33 | 1 Proneural   | GBM               | IV  | 20-24 | No   |
| HF0992 | 21 | 1 Proneural   | GBM               | IV  | 75-79 | No   |
| HF1186 | 21 | 1 Proneural   | GBM               | IV  | 30-34 | No   |
| HF0855 | 15 | 1 Proneural   | GBM               | IV  | 55-59 | No   |
| HF0654 | 15 | 1 Proneural   | GBM               | IV  | 55-59 | No   |
| HF0963 | 11 | 1 Proneural   | GBM               | IV  | 75-79 | No   |
| HF1318 | 8  | 1 Proneural   | GBM               | IV  | 50-54 | No   |
| HF1338 | 6  | 1 Proneural   | GBM               | IV  | 50-54 | No   |
| HF1702 | 6  | 1 Proneural   | GBM               | IV  | 75-79 | No   |
| HF0180 | 1  | 1 Proneural   | GBM               | IV  | 70-74 | No   |
| E09966 | 15 | 1 Classic     | OLIGODENDROGLIOMA | --  | 55-59 | No   |
| HF1345 | 60 | 0 Classic     | OLIGODENDROGLIOMA | II  | 15-19 | No   |
| HF0327 | 21 | 1 Classic     | OLIGODENDROGLIOMA | II  | 70-74 | N.D. |
| HF1150 | 21 | 1 Classic     | OLIGODENDROGLIOMA | III | 70-74 | No   |
| HF0510 | 21 | 1 Classic     | OLIGODENDROGLIOMA | III | 70-74 | No   |
| HF0816 | 45 | 1 Classic     | OLIGODENDROGLIOMA | III | 45-49 | Yes  |
| E09513 | 15 | 1 Neural      | OLIGODENDROGLIOMA | --  | 50-54 | No   |
| E09664 | 27 | 1 Neural      | OLIGODENDROGLIOMA | --  | 40-44 | No   |
| HF0599 | 45 | 1 Neural      | OLIGODENDROGLIOMA | II  | 50-54 | No   |
| HF0285 | 15 | 1 Neural      | OLIGODENDROGLIOMA | II  | 60-64 | No   |
| HF1167 | 15 | 1 Neural      | OLIGODENDROGLIOMA | II  | 45-49 | No   |
| HF1381 | 60 | 0 Proneural   | OLIGODENDROGLIOMA | II  | 25-29 | No   |
| HF1502 | 8  | 1 Proneural   | OLIGODENDROGLIOMA | III | 35-39 | No   |
| HF0087 | 60 | 0 Proneural   | OLIGODENDROGLIOMA | --  | 60-64 | Yes  |
| E09448 | 60 | 0 Proneural   | OLIGODENDROGLIOMA | --  | 40-44 | No   |
| E09959 | 45 | 1 Proneural   | OLIGODENDROGLIOMA | --  | 50-54 | N.D. |
| HF1489 | 60 | 0 Proneural   | OLIGODENDROGLIOMA | II  | 50-54 | No   |
| HF0931 | 60 | 0 Proneural   | OLIGODENDROGLIOMA | II  | 35-39 | No   |
| HF1677 | 60 | 0 Proneural   | OLIGODENDROGLIOMA | II  | 50-54 | Yes  |
| HF0962 | 60 | 0 Proneural   | OLIGODENDROGLIOMA | II  | 30-34 | Yes  |
| HF0899 | 60 | 0 Proneural   | OLIGODENDROGLIOMA | II  | 55-59 | No   |
| HF0726 | 60 | 0 Proneural   | OLIGODENDROGLIOMA | II  | 35-39 | N.D. |
| HF1235 | 60 | 0 Proneural   | OLIGODENDROGLIOMA | II  | 35-39 | No   |
| HF1551 | 60 | 0 Proneural   | OLIGODENDROGLIOMA | II  | 30-34 | Yes  |
| HF1613 | 60 | 0 Proneural   | OLIGODENDROGLIOMA | II  | 35-39 | Yes  |
| HF1606 | 60 | 0 Proneural   | OLIGODENDROGLIOMA | II  | 60-64 | No   |
| HF0914 | 60 | 0 Proneural   | OLIGODENDROGLIOMA | II  | 40-44 | No   |
| HF1325 | 60 | 0 Proneural   | OLIGODENDROGLIOMA | II  | 35-39 | No   |
| HF0670 | 60 | 0 Proneural   | OLIGODENDROGLIOMA | II  | 50-54 | N.D. |
| HF0291 | 60 | 0 Proneural   | OLIGODENDROGLIOMA | II  | 50-54 | No   |
| HF0960 | 60 | 0 Proneural   | OLIGODENDROGLIOMA | II  | 30-34 | No   |
| HF0835 | 45 | 1 Proneural   | OLIGODENDROGLIOMA | II  | 35-39 | N.D. |
| HF0975 | 39 | 1 Proneural   | OLIGODENDROGLIOMA | II  | 60-64 | Yes  |
| HF0434 | 6  | 1 Proneural   | OLIGODENDROGLIOMA | II  | 60-64 | Yes  |
| HF0920 | 1  | 1 Proneural   | OLIGODENDROGLIOMA | II  | 85-89 | N.D. |
| HF0966 | 60 | 0 Proneural   | OLIGODENDROGLIOMA | III | 50-54 | N.D. |
| HF1156 | 60 | 0 Proneural   | OLIGODENDROGLIOMA | III | 30-34 | Yes  |
| HF1227 | 60 | 0 Proneural   | OLIGODENDROGLIOMA | III | 25-29 | Yes  |
| HF1334 | 60 | 0 Proneural   | OLIGODENDROGLIOMA | III | 20-24 | No   |
| HF1185 | 60 | 0 Proneural   | OLIGODENDROGLIOMA | III | 25-29 | No   |
| HF1136 | 45 | 1 Proneural   | OLIGODENDROGLIOMA | III | 35-39 | No   |
| HF1493 | 39 | 1 Proneural   | OLIGODENDROGLIOMA | III | 70-74 | Yes  |
| HF0251 | 21 | 1 Proneural   | OLIGODENDROGLIOMA | III | 50-54 | Yes  |

| Proneural    | Neural      | Classical   | Mesenchymal | PAM-prob-Classical | PAM-prob-Mesenchymal | PAM-prob-Neural | PAM-prob-Proneural |
|--------------|-------------|-------------|-------------|--------------------|----------------------|-----------------|--------------------|
| -0.17548331  | 0.03722061  | 0.04111276  | -0.16002193 | 0.973601082        | 2.35E-47             | 0.026398903     | 1.56E-08           |
| -0.30727016  | -0.21491082 | 0.22588909  | -0.11786833 | 1                  | 4.20E-63             | 6.61E-75        | 1.96E-57           |
| -0.23569581  | 0.04020046  | 0.03738289  | 0.02570715  | 1                  | 2.32E-36             | 6.40E-11        | 2.19E-24           |
| -0.31123483  | -0.03509213 | -0.10033232 | 0.2409136   | 8.14E-25           | 1                    | 1.66E-16        | 3.26E-47           |
| -0.27750141  | -0.09960012 | 0.01246473  | 0.37678394  | 1.44E-66           | 1                    | 1.64E-111       | 2.27E-132          |
| -0.26556256  | -0.09405149 | -0.04003804 | 0.40628655  | 9.16E-116          | 1                    | 1.82E-164       | 4.01E-195          |
| -0.02834075  | 0.00940329  | -0.01582836 | 0.24114743  | 2.53E-27           | 1                    | 1.35E-25        | 2.12E-35           |
| -0.10851956  | 0.10600719  | -0.12014526 | 0.3657104   | 9.70E-58           | 1                    | 2.41E-24        | 2.50E-62           |
| -0.08162595  | 0.01977534  | -0.12230225 | 0.12504465  | 2.35E-19           | 4.37E-17             | 1               | 4.00E-10           |
| -0.08501583  | 0.32200499  | -0.10386991 | 0.03805214  | 2.23E-38           | 6.76E-56             | 1               | 4.35E-31           |
| -0.02177614  | 0.26468447  | -0.01589119 | -0.09905855 | 1.40E-31           | 5.62E-83             | 1               | 8.42E-22           |
| 0.05663593   | 0.25128685  | -0.10714295 | -0.03736741 | 5.76E-33           | 1.08E-79             | 0.999999015     | 9.85E-07           |
| 0.20653827   | 0.31238275  | -0.10150528 | -0.03119725 | 6.74E-55           | 1.24E-95             | 0.999999984     | 1.59E-08           |
| 0.01231168   | 0.30892749  | -0.00031496 | 0.12633369  | 1.50E-17           | 3.42E-72             | 1               | 7.25E-13           |
| 0.03620391   | 0.13226847  | -0.10416799 | -0.0703419  | 1.72E-43           | 2.59E-75             | 0.999998698     | 1.30E-06           |
| -0.11256031  | 0.22326553  | 0.02662414  | -0.20391371 | 7.74E-18           | 1.85E-86             | 0.999999991     | 8.90E-09           |
| 0.02665198   | 0.02440749  | -0.01418338 | 0.12885957  | 7.79E-27           | 3.99E-35             | 8.24E-22        | 1                  |
| 0.1455686    | 0.29754711  | -0.07074295 | -0.20408589 | 1.33E-54           | 1.65E-123            | 1.54E-18        | 1                  |
| -0.011739361 | 0.05984597  | -0.06411859 | -0.14283065 | 8.92E-43           | 1.55E-93             | 3.05E-16        | 1                  |
| 0.26500441   | -0.03616724 | -0.05167829 | -0.27476351 | 4.81E-103          | 1.75E-192            | 5.91E-92        | 1                  |
| 0.34465298   | 0.12624758  | -0.03545295 | -0.15727696 | 3.16E-74           | 1.44E-135            | 2.81E-53        | 1                  |
| 0.2685822    | 0.3154403   | -0.07882809 | -0.16596784 | 4.56E-65           | 4.27E-124            | 1.02E-21        | 1                  |
| 0.29244119   | 0.18590577  | 0.0154343   | -0.17562899 | 2.06E-69           | 4.27E-145            | 6.62E-51        | 1                  |
| 0.26917586   | 0.08192786  | -0.02309892 | -0.1645396  | 3.67E-66           | 2.27E-124            | 1.53E-46        | 1                  |
| 0.41185962   | -0.06555543 | -0.05731561 | -0.15756578 | 3.05E-117          | 1.12E-196            | 2.34E-121       | 1                  |
| 0.3259946    | 0.19882599  | -0.12011051 | -0.23815858 | 6.51E-91           | 5.65E-167            | 9.08E-55        | 1                  |
| 0.21282139   | 0.01918477  | -0.04828767 | -0.03874205 | 7.74E-52           | 2.86E-103            | 3.17E-46        | 1                  |
| 0.28920027   | 0.26260255  | -0.09530166 | -0.154178   | 5.12E-68           | 3.04E-127            | 1.67E-28        | 1                  |
| 0.40024935   | 0.03957784  | -0.04370796 | -0.15994365 | 1.77E-104          | 3.78E-180            | 1.04E-95        | 1                  |
| 0.32946307   | 0.0939639   | -0.11177817 | -0.11588081 | 3.39E-69           | 1.66E-111            | 5.42E-38        | 1                  |
| 0.22114941   | 0.00769947  | -0.1243125  | 0.00226955  | 1.19E-43           | 1.70E-54             | 2.11E-35        | 1                  |
| 0.11587421   | -0.08773361 | 0.05883813  | -0.27359261 | 2.81E-23           | 1.10E-119            | 1.26E-65        | 1                  |
| -0.39943747  | -0.15312173 | 0.10588549  | -0.10354404 | 1                  | 1.10E-53             | 8.63E-56        | 7.52E-57           |
| -0.38772947  | -0.16391182 | 0.18835137  | -0.01496568 | 1                  | 4.16E-57             | 4.54E-87        | 1.57E-92           |
| -0.24452018  | -0.08483984 | 0.07459009  | -0.10188429 | 1                  | 1.19E-51             | 7.02E-26        | 5.52E-25           |
| -0.2742313   | -0.10306595 | 0.12827172  | 0.03114713  | 1                  | 1.16E-38             | 4.17E-44        | 1.72E-51           |
| -0.07342741  | -0.13760946 | 0.24255159  | -0.0717974  | 1                  | 4.11E-96             | 5.66E-77        | 2.26E-23           |
| -0.30402531  | -0.1157238  | 0.16257148  | -0.009684   | 1                  | 1.14E-29             | 3.01E-47        | 4.62E-49           |
| -0.04541159  | -0.07212039 | 0.18913044  | -0.22834151 | 1                  | 3.37E-91             | 4.19E-63        | 1.11E-23           |
| -0.12185591  | -0.09910027 | 0.16170549  | -0.08660006 | 0.999992492        | 1.03E-59             | 2.52E-37        | 7.51E-06           |
| -0.19967819  | -0.21478497 | 0.29476509  | -0.19408718 | 1                  | 5.10E-119            | 1.35E-120       | 8.56E-61           |
| -0.35437379  | -0.16974918 | 0.1200068   | -0.06173281 | 1                  | 5.39E-49             | 4.88E-57        | 1.95E-57           |
| -0.41035484  | -0.25491013 | 0.10969371  | 0.01174549  | 1                  | 2.15E-32             | 1.65E-81        | 1.09E-69           |
| -0.31501842  | -0.17031877 | 0.29982508  | -0.10642419 | 1                  | 4.95E-92             | 1.94E-105       | 3.66E-95           |
| -0.21434355  | -0.18979278 | 0.25220394  | -0.14638042 | 1                  | 2.24E-89             | 4.87E-102       | 2.00E-66           |
| -0.37820088  | -0.25029108 | 0.17645416  | 0.00778511  | 1                  | 7.51E-33             | 2.46E-86        | 3.89E-88           |
| -0.24015677  | -0.09821462 | 0.14794859  | 0.03151229  | 1                  | 1.69E-29             | 6.98E-58        | 5.34E-55           |
| -0.34346515  | -0.13807583 | 0.24928976  | -0.10210694 | 1                  | 9.48E-68             | 3.05E-81        | 3.83E-76           |
| -0.14161178  | 0.03011735  | 0.17684226  | -0.20429304 | 1                  | 1.99E-98             | 6.22E-44        | 8.86E-24           |
| -0.28887407  | -0.25940619 | 0.15691449  | -0.02788222 | 1                  | 1.02E-50             | 6.91E-85        | 2.06E-56           |
| -0.32692948  | -0.25153413 | 0.1554062   | -0.08613926 | 1                  | 5.17E-63             | 4.18E-78        | 8.16E-61           |
| -0.36087857  | -0.15095694 | 0.25588424  | -0.15837012 | 1                  | 1.94E-87             | 6.58E-89        | 2.21E-88           |
| -0.4607918   | -0.1992977  | 0.16785498  | 0.02584397  | 1                  | 3.57E-37             | 2.88E-88        | 1.11E-102          |
| -0.38973597  | -0.23392828 | 0.22067026  | -0.06335671 | 1                  | 1.76E-67             | 5.82E-110       | 1.61E-102          |
| -0.36882161  | -0.12401431 | 0.10290742  | -0.03961462 | 1                  | 2.61E-27             | 2.25E-42        | 1.78E-62           |
| -0.2995607   | -0.03092742 | 0.04656936  | -0.06916207 | 1                  | 6.92E-39             | 4.57E-25        | 3.96E-28           |
| -0.22736428  | -0.2116593  | 0.25694975  | -0.16144594 | 1                  | 1.12E-91             | 5.41E-109       | 3.55E-65           |
| -0.3174331   | -0.17962659 | 0.2334104   | -0.08287329 | 1                  | 2.27E-68             | 1.96E-74        | 1.85E-65           |
| -0.30603324  | -0.00121195 | 0.00178055  | 0.00631502  | 1                  | 8.47E-27             | 8.29E-17        | 1.12E-40           |
| -0.21383546  | 0.04653945  | 0.08846691  | 0.0889534   | 1                  | 9.26E-22             | 3.44E-14        | 7.68E-24           |
| -0.16997582  | -0.16047248 | 0.01297989  | 0.04109141  | 1                  | 1.49E-32             | 1.47E-51        | 1.21E-47           |
| -0.03931097  | -0.00697185 | -0.02218171 | 0.16757862  | 0.999999992        | 6.26E-09             | 1.76E-13        | 1.55E-09           |
| -0.30090525  | -0.15581483 | 0.02864312  | 0.08801564  | 0.999999995        | 5.25E-09             | 9.81E-52        | 1.51E-44           |
| -0.3828268   | -0.14970652 | 0.06797526  | 0.19375123  | 0.999999995        | 5.30E-09             | 7.45E-56        | 2.27E-62           |
| -0.378276    | -0.18899162 | 0.1045713   | 0.14712171  | 0.782808311        | 0.217191689          | 5.39E-69        | 8.54E-85           |
| -0.17429013  | -0.15576975 | 0.01590906  | 0.1319131   | 0.999998305        | 1.70E-06             | 1.24E-54        | 3.04E-33           |
| -0.37650087  | -0.13142243 | 0.08690157  | 0.1925082   | 0.999968936        | 3.11E-05             | 3.18E-68        | 3.66E-94           |
| -0.23865017  | -0.10373047 | 0.00966826  | 0.02371736  | 1                  | 1.67E-22             | 1.86E-27        | 8.70E-11           |
| -0.38314827  | -0.11926156 | 0.03285557  | 0.25482086  | 0.806032422        | 0.193967578          | 1.58E-49        | 7.87E-68           |
| -0.26134692  | -0.15213704 | 0.03401277  | 0.19159751  | 0.999999845        | 1.55E-07             | 8.58E-40        | 1.22E-34           |
| -0.25418725  | -0.01319754 | 0.04914334  | 0.07544105  | 0.55861158         | 0.44003312           | 0.001355299     | 6.92E-14           |
| -0.25066755  | 0.06802561  | 0.03281914  | -0.06440237 | 1                  | 1.72E-43             | 3.73E-17        | 3.08E-30           |
| -0.20136507  | 0.22353612  | 0.04650536  | -0.05130934 | 0.616291537        | 5.58E-50             | 0.383708463     | 7.63E-32           |
| -0.19963801  | 0.0097544   | -0.03415866 | 0.0003145   | 0.999999996        | 1.55E-18             | 4.41E-09        | 3.52E-27           |
| -0.13555625  | 0.00463045  | -0.05081707 | 0.41965459  | 1                  | 1.13E-65             | 2.43E-74        | 1.06E-98           |
| -0.25687156  | -0.085568   | -0.0750297  | 0.2837869   | 1                  | 3.42E-67             | 2.38E-65        | 3.15E-101          |
| -0.1434922   | -0.05300305 | -0.05003812 | 0.43917289  | 7.10E-77           | 1                    | 1.44E-86        | 4.77E-102          |
| -0.22493065  | -0.02574323 | -0.1172613  | 0.37806405  | 1.15E-80           | 1                    | 1.96E-66        | 2.13E-103          |
| -0.15518661  | 0.13235542  | -0.1277981  | 0.31816973  | 1.95E-13           | 0.993172772          | 0.006827228     | 1.46E-18           |
| -0.35450525  | -0.0865225  | 0.04973416  | 0.2874398   | 1.01E-37           | 1                    | 2.27E-84        | 2.12E-117          |
| -0.37746284  | -0.09152878 | -0.00022567 | 0.25010017  | 3.79E-07           | 0.999999621          | 2.18E-32        | 5.48E-52           |
| -0.28401706  | -0.16627996 | 0.01401749  | 0.21082045  | 3.16E-18           | 1                    | 4.11E-77        | 1.71E-65           |
| -0.31105817  | -0.00718174 | -0.04981443 | 0.27255515  | 1.78E-21           | 1                    | 4.08E-37        | 1.66E-63           |
| -0.33776117  | -0.12349815 | -0.03428909 | 0.32925111  | 1.16E-76           | 1                    | 2.25E-129       | 1.19E-153          |
| -0.2900596   | -0.12297064 | 0.034008    | 0.30012238  | 3.69E-38           | 1                    | 9.96E-102       | 2.99E-112          |
| -0.17533869  | 0.04276176  | -0.07199567 | 0.26929604  | 8.93E-13           | 1                    | 3.50E-18        | 4.26E-26           |
| -0.16907479  | -0.02131682 | -0.06619232 | 0.38568561  | 1.09E-53           | 1                    | 1.17E-66        | 9.58E-78           |
| -0.28626911  | -0.07399953 | -0.00291189 | 0.16963521  | 1.55E-23           | 1                    | 1.48E-55        | 1.38E-77           |
| -0.29883143  | -0.02893055 | -0.03795069 | 0.14294972  | 4.19E-05           | 0.999958111          | 1.52E-15        | 7.92E-34           |
| -0.25028244  | 0.10375744  | -0.0842127  | 0.28914348  | 4.10E-21           | 0.999991172          | 8.83E-06        | 5.37E-46           |

|             |             |             |             |             |             |              |             |
|-------------|-------------|-------------|-------------|-------------|-------------|--------------|-------------|
| -0.30235288 | -0.01613086 | -0.0244793  | 0.27617447  | 5.33E-32    | 1           | 6.73E-63     | 8.12E-89    |
| -0.28401688 | -0.00872185 | -0.06266611 | 0.35977284  | 3.20E-44    | 1           | 7.61E-54     | 8.86E-85    |
| -0.14589056 | 0.00140202  | 0.03794677  | 0.25273671  | 1.07E-48    | 1           | 2.96E-89     | 1.02E-99    |
| -0.36594416 | -0.17954004 | 0.05129005  | 0.22400734  | 2.14E-09    | 0.999999999 | 8.69E-81     | 7.22E-91    |
| -0.33587359 | -0.13641375 | -0.00162913 | 0.28144684  | 3.81E-32    | 1           | 1.23E-76     | 7.32E-93    |
| 0.00324426  | 0.05232273  | -0.12694784 | 0.17088045  | 2.16E-43    | 3.38E-23    | 1            | 1.91E-15    |
| -0.12006583 | 0.05458275  | -0.15014483 | 0.21174128  | 3.96E-26    | 0.181972775 | 0.818027225  | 5.82E-28    |
| -0.20003401 | 0.00619971  | -0.12398337 | 0.12289294  | 3.97E-17    | 1.39E-08    | 0.999999986  | 3.85E-21    |
| 0.04162941  | 0.29012603  | -0.08807226 | 0.02602697  | 8.26E-41    | 4.06E-68    | 1            | 5.56E-14    |
| 0.13033656  | 0.38972338  | -0.10391602 | -0.07201977 | 5.30E-65    | 6.13E-107   | 1            | 2.82E-17    |
| 0.02371049  | 0.2626009   | -0.09486119 | 0.05102597  | 1.98E-30    | 4.71E-64    | 1            | 6.60E-17    |
| 0.20187064  | 0.3543242   | -0.10479236 | -0.0787432  | 3.02E-60    | 3.08E-107   | 0.9999999612 | 3.88E-07    |
| -0.23042139 | 0.19953903  | 0.01634551  | 0.09503303  | 5.65E-21    | 1.31E-32    | 1            | 1.45E-36    |
| 0.16991298  | 0.324886    | -0.06142996 | -0.07308323 | 1.18E-57    | 5.24E-113   | 0.833619243  | 0.166380757 |
| -0.15295024 | 0.06659551  | -0.14905112 | 0.04470661  | 0.000346318 | 2.12E-21    | 0.866987365  | 0.132666317 |
| 0.16703054  | 0.32616193  | -0.13239868 | -0.07264175 | 1.65E-60    | 1.25E-104   | 1            | 2.53E-10    |
| 0.09307416  | 0.28193236  | -0.12256395 | -0.12606261 | 2.03E-54    | 7.00E-101   | 0.999999998  | 1.94E-09    |
| -0.02758078 | -0.09959868 | 0.03844924  | -0.05642089 | 0.003628588 | 4.65E-45    | 1.11E-21     | 0.996371412 |
| -0.15747282 | -0.09084948 | -0.01662733 | -0.09127501 | 0.015438516 | 9.28E-47    | 1.22E-21     | 0.984561484 |
| -0.04007235 | -0.12563729 | -0.01490673 | 0.04570972  | 0.003833072 | 3.21E-41    | 7.30E-29     | 0.996166928 |
| 0.05267777  | -0.19088033 | 0.0369162   | 0.06051635  | 0.000400102 | 6.31E-34    | 2.18E-71     | 0.999599898 |
| 0.162101058 | 0.1761939   | -0.01117324 | -0.11019316 | 8.88E-43    | 8.87E-108   | 1.11E-24     | 1           |
| 0.03910664  | 0.09490998  | -0.10261252 | -0.00940163 | 3.60E-26    | 6.47E-64    | 2.97E-12     | 1           |
| 0.13239279  | 0.1697304   | -0.02283916 | -0.04693899 | 4.40E-27    | 3.03E-80    | 2.45E-25     | 1           |
| 0.07640625  | 0.24767957  | -0.15407635 | 0.15815959  | 9.45E-24    | 2.73E-22    | 0.155704913  | 0.844295087 |
| 0.39687026  | -0.07771062 | -0.00635114 | -0.09977523 | 2.78E-57    | 6.50E-103   | 2.86E-71     | 1           |
| 0.40691201  | 0.01193259  | -0.0404053  | -0.02352294 | 4.78E-62    | 2.57E-93    | 7.96E-65     | 1           |
| 0.21474639  | -0.15289309 | -0.04719067 | -0.06062698 | 7.42E-52    | 1.76E-93    | 2.09E-79     | 1           |
| 0.29250415  | -0.09404856 | -0.04643922 | 0.00862008  | 9.65E-66    | 3.54E-97    | 2.14E-70     | 1           |
| 0.23594349  | -0.19761236 | -0.10767816 | -0.11015224 | 5.44E-48    | 2.44E-114   | 1.37E-93     | 1           |
| 0.1715094   | -0.01740279 | -0.01765762 | -0.09722135 | 1.51E-35    | 3.22E-89    | 1.97E-43     | 1           |
| 0.36139893  | -0.07441909 | 0.0155358   | -0.04695105 | 1.51E-70    | 3.56E-122   | 2.87E-96     | 1           |
| 0.28493828  | 0.0540374   | -0.03180342 | -0.18232999 | 3.65E-60    | 1.05E-126   | 2.14E-62     | 1           |
| 0.16426384  | 0.11461577  | -0.04672759 | -0.01794303 | 6.26E-33    | 9.28E-71    | 5.88E-15     | 1           |
| 0.25004618  | -0.14451204 | -0.0260565  | 0.03214212  | 2.35E-24    | 4.45E-55    | 2.05E-53     | 1           |
| 0.24074345  | -0.10170515 | -0.04838877 | -0.0419252  | 1.32E-54    | 7.93E-94    | 1.88E-62     | 1           |
| 0.43317008  | -0.04742233 | -0.06800764 | -0.15942032 | 6.38E-90    | 1.60E-149   | 2.87E-89     | 1           |
| 0.33903631  | -0.10866722 | -0.02211334 | 0.01479992  | 6.06E-57    | 2.26E-83    | 1.67E-60     | 1           |
| 0.20190506  | -0.1222316  | 0.00332991  | -0.07043159 | 1.44E-35    | 9.71E-71    | 4.93E-53     | 1           |
| 0.33529984  | -0.12864297 | -0.05495747 | 0.15786664  | 8.41E-39    | 8.65E-54    | 4.33E-60     | 1           |
| 0.33195129  | -0.02826449 | -0.04350018 | -0.21959331 | 7.32E-62    | 2.24E-133   | 1.26E-69     | 1           |
| 0.32865715  | -0.06844907 | -0.02599935 | 0.04562388  | 1.75E-61    | 3.45E-88    | 3.79E-68     | 1           |
| 0.35676814  | -0.07356744 | -0.06023162 | -0.06743856 | 2.84E-85    | 5.35E-127   | 1.23E-99     | 1           |
| -0.16769663 | -0.2023638  | 0.14865411  | -0.17742386 | 1           | 2.49E-94    | 4.97E-73     | 5.84E-34    |
| 0.05939938  | 0.02173562  | 0.11496749  | -0.02906838 | 0.999996933 | 8.73E-58    | 1.35E-22     | 3.07E-06    |
| -0.14570919 | -0.10362383 | 0.05509786  | -0.03128611 | 0.999881953 | 3.92E-39    | 1.03E-46     | 0.000118047 |
| -0.13953337 | -0.1528541  | 0.20958763  | -0.12918198 | 1           | 8.51E-84    | 1.68E-58     | 1.37E-22    |
| -0.29968743 | -0.04101851 | 0.031759    | -0.02175229 | 1           | 6.71E-30    | 2.01E-28     | 1.25E-21    |
| -0.16271534 | 0.08451829  | 0.04438126  | -0.11132914 | 0.99997469  | 1.95E-43    | 2.53E-05     | 2.72E-14    |
| 0.03388568  | 0.0985932   | -0.0594822  | 0.14788595  | 3.81E-20    | 3.15E-30    | 1            | 1.37E-14    |
| -0.01284146 | 0.17789807  | -0.11481051 | 0.07798261  | 1.39E-37    | 2.47E-53    | 0.999998765  | 1.24E-06    |
| 0.20046634  | 0.30094199  | -0.10090303 | -0.00377117 | 5.06E-60    | 5.53E-94    | 0.999999996  | 4.12E-09    |
| 0.17436055  | 0.34682044  | -0.13730476 | -0.14147308 | 2.25E-77    | 7.42E-125   | 0.999999997  | 3.40E-09    |
| -0.18391284 | 0.08212059  | 0.0606458   | 0.04393613  | 0.054666623 | 4.18E-39    | 0.945333377  | 8.91E-19    |
| 0.11941066  | 0.18175713  | -0.00689565 | -0.13903434 | 1.70E-49    | 6.64E-110   | 2.38E-31     | 1           |
| 0.20509046  | 0.36501178  | -0.083884   | -0.11779613 | 3.20E-62    | 1.36E-123   | 6.60E-08     | 0.999999934 |
| 0.43395896  | 0.03190222  | -0.10555529 | -0.2430786  | 3.26E-102   | 1.14E-182   | 7.61E-92     | 1           |
| 0.41648301  | -0.07131375 | 0.00137297  | -0.06762    | 2.12E-59    | 1.96E-141   | 9.23E-103    | 1           |
| 0.44042789  | 0.10246982  | -0.01727187 | -0.16219116 | 2.92E-95    | 4.10E-167   | 1.81E-85     | 1           |
| 0.42653873  | 0.03532591  | -0.09554082 | -0.24422538 | 2.02E-103   | 1.60E-184   | 9.50E-92     | 1           |
| 0.40342675  | 0.01181073  | -0.05007529 | -0.20637034 | 3.90E-99    | 1.43E-168   | 1.42E-87     | 1           |
| 0.40007119  | 0.08589984  | -0.12771566 | -0.20757812 | 6.52E-96    | 5.48E-167   | 4.36E-67     | 1           |
| 0.38502411  | 0.01236302  | -0.07937852 | -0.19914141 | 1.35E-102   | 3.56E-185   | 1.56E-96     | 1           |
| 0.37343931  | 0.15636191  | -0.09315176 | -0.16859879 | 1.00E-77    | 3.07E-140   | 4.03E-50     | 1           |
| 0.3716583   | 0.05203333  | -0.07898084 | -0.17856516 | 2.84E-84    | 6.94E-155   | 2.19E-74     | 1           |
| 0.36823895  | -0.01923605 | -0.07213565 | -0.23556927 | 7.64E-106   | 3.80E-195   | 6.00E-104    | 1           |
| 0.36414263  | 0.04560779  | -0.07091859 | -0.23921573 | 1.27E-85    | 2.19E-161   | 9.73E-77     | 1           |
| 0.3399543   | 0.02349958  | -0.03563984 | -0.22791696 | 1.58E-96    | 1.11E-173   | 1.82E-85     | 1           |
| 0.32870745  | 0.08098469  | -0.03147051 | -0.14879582 | 5.10E-71    | 9.89E-132   | 1.02E-61     | 1           |
| 0.31227039  | 0.0050992   | -0.08221999 | -0.02177863 | 1.72E-73    | 2.59E-108   | 6.61E-57     | 1           |
| 0.3013896   | -0.05693597 | -0.02110722 | -0.21072639 | 2.88E-102   | 3.41E-183   | 2.14E-100    | 1           |
| 0.22695215  | 0.01419946  | -0.02764897 | -0.16778842 | 1.14E-66    | 3.94E-132   | 6.49E-64     | 1           |
| 0.22669438  | 0.10118835  | -0.06927998 | -0.21899866 | 1.40E-73    | 6.94E-141   | 2.33E-54     | 1           |
| 0.22007993  | 0.05173498  | -0.03851671 | -0.19286769 | 9.67E-64    | 1.35E-133   | 5.69E-48     | 1           |
| 0.29732113  | 0.10337098  | -0.0531218  | -0.19848639 | 2.11E-77    | 3.71E-153   | 1.24E-66     | 1           |
| 0.41163669  | 0.0550953   | -0.08915083 | -0.20382258 | 4.19E-107   | 1.43E-186   | 6.80E-86     | 1           |
| 0.32081461  | 0.10420607  | -0.13475782 | -0.20002437 | 1.16E-82    | 1.30E-149   | 3.40E-61     | 1           |
| 0.36896782  | -0.0312714  | -0.12586676 | -0.13818005 | 1.06E-103   | 2.88E-177   | 5.74E-101    | 1           |
| 0.37389313  | 0.02446722  | -0.01757404 | -0.10291857 | 1.09E-105   | 5.65E-159   | 7.45E-86     | 1           |
| 0.35072244  | -0.01214959 | -0.03272106 | -0.21112607 | 1.24E-88    | 2.59E-167   | 3.27E-85     | 1           |
| 0.31024662  | 0.1590435   | -0.10792608 | -0.21416702 | 6.50E-75    | 9.98E-139   | 5.70E-49     | 1           |
| 0.29401963  | -0.0114594  | -0.04599502 | -0.04345158 | 6.01E-61    | 7.99E-118   | 9.80E-66     | 1           |
| 0.03919209  | 0.02308593  | 0.03062321  | -0.05492026 | 1.26E-12    | 1.85E-67    | 7.40E-28     | 1           |
| 0.21084805  | -0.18665748 | 0.10197117  | -0.07978234 | 1.05E-21    | 2.49E-105   | 5.23E-99     | 1           |
| 0.46903082  | -0.0536463  | -0.06997425 | -0.09147894 | 3.98E-127   | 8.69E-194   | 3.52E-137    | 1           |
| 0.47560281  | -0.07433132 | 0.00795974  | -0.06940547 | 1.75E-99    | 1.26E-162   | 9.53E-128    | 1           |
