# Supplementary material for: The Proneural Molecular Signature Is Enriched in Oligodendrogliomas and Predicts Improved Survival among Diffuse Gliomas
Source: PLoS One. 2010 Sep 3;5(9):e12548. doi: 10.1371/journal.pone.0012548 (PMC2933229; doi:10.1371/journal.pone.0012548)
Supplement: Table S7 — Significant Comparative Marker Selection Results generated from Rembrandt data comparing proneural oligodendroglioma and all other oligodendroglioma samples. Data were generated using GenePattern 3.0. (0.15 MB XLS) [file pone.0012548.s007.xls]

## Sheet: Sheet1
Probe ID	Symbol	Score	FDR(BH)	Fold Change	PN-oligo Mean	PN-oligo Std	Rest Mean	Rest Std
210753_s_at	EPHB1	11.1689	0.0477544	2.7195	652.337	194.275	239.874	45.0293
230425_at	EPHB1	11.0549	0.0477544	4.27311	898.76	313.313	210.329	94.4162
211898_s_at	EPHB1	10.0704	0.0477544	2.85034	276.171	93.7231	96.8907	21.6047
203620_s_at	FCHSD2	9.78671	0.0477544	2.23983	1545.01	438.621	689.791	133.664
227498_at	---	9.59906	0.0477544	3.70514	2397.99	790.094	647.207	389.032
234472_at	GALNT13	9.42963	0.0477544	7.28046	912.695	460.024	125.362	62.7824
236536_at	GALNT13	9.40087	0.0477544	3.20564	840.103	320.596	262.07	79.0955
226913_s_at	SOX8	9.40073	0.0477544	3.59348	8156.84	2842.8	2269.9	1239.22
227497_at	---	9.40009	0.0477544	3.6737	1466.73	521.992	399.253	219.529
212124_at	ZMIZ1	9.23255	0.0477544	1.81969	3758.8	777.574	2065.63	402.641
238603_at	LOC254559	9.18666	0.0477544	2.91677	863.126	325.38	295.918	74.4312
228214_at	---	9.04161	0.0477544	3.45198	1352.07	456.726	391.679	228.913
1569872_a_at	LOC650392	8.89858	0.0477544	2.63041	5682.8	2112.86	2160.42	434.726
205290_s_at	BMP2	8.89701	0.0477544	7.16423	798.406	427.125	111.443	53.5498
201951_at	ALCAM	8.87717	0.0477544	2.34871	917.904	283.2	390.812	105.883
218796_at	C20orf42	8.68216	0.0477544	8.30367	2387.36	1353.54	287.507	116.962
60474_at	C20orf42	8.57197	0.0477544	11.2177	1794.52	1065.4	159.972	98.9311
227984_at	LOC650392	8.52809	0.0477544	3.06144	3525.77	1506.45	1151.67	269.042
243779_at	GALNT13	8.48631	0.0477544	8.4379	751.479	439.513	89.0599	24.8925
219537_x_at	DLL3	8.48372	0.0477544	5.61441	2940.79	1565.09	523.793	225.433
224933_s_at	JMJD1C	8.40572	0.0477544	1.91136	785.512	204.628	410.971	86.2888
228790_at	C8orf72	8.36465	0.0477544	3.31769	1863.14	840.142	561.576	153.956
219230_at	TMEM100	8.34623	0.0477544	8.24528	2543.46	1447.22	308.474	262.338
1569871_at	LOC650392	8.21162	0.0477544	2.65924	5198.3	2033.26	1954.81	543.186
212462_at	MYST4	8.0908	0.0477544	1.91691	1053.91	306.832	549.796	101.692
239014_at	CCAR1	8.0892	0.0477544	1.90427	85.6376	24.3532	44.9713	8.61005
205289_at	BMP2	8.08728	0.0477544	9.73416	1235.26	760.644	126.9	87.8836
240655_at	ALCAM	7.96459	0.0477544	3.28284	419.665	194.297	127.836	42.3202
230336_at	C2orf27	7.94247	0.0477544	2.06253	155.607	55.3282	75.4449	8.26024
234996_at	---	7.81031	0.0477544	5.47168	221.965	129.741	40.5662	12.1448
241391_at	JMJD1C	7.78845	0.0477544	2.19135	393.657	118.964	179.641	58.6593
235457_at	MAML2	7.78559	0.0477544	2.67127	2777.14	856.254	1039.63	543.896
227845_s_at	SHD	7.75037	0.0477544	5.46457	1434.68	824.875	262.543	133.056
242418_at	LOC730719	7.71945	0.0477544	3.4308	242.527	124.214	70.6912	12.119
210414_at	FLRT1	7.68197	0.0477544	2.09725	600.628	180.916	286.388	84.5891
225585_at	RAP2A	7.64073	0.0477544	2.07888	4385.12	1103.26	2109.36	746.607
241506_at	LPHN3	7.63807	0.0477544	2.26441	108.508	37.3308	47.9188	14.5988
222784_at	SMOC1	7.48951	0.0477544	4.0921	4264.67	1961.44	1042.17	844.956
221830_at	RAP2A	7.43284	0.0477544	2.18505	4724.22	1435.36	2162.06	773.849
227341_at	C10orf30	7.40301	0.0477544	2.3806	312.318	123.976	131.193	36.0722
206331_at	CALCRL	7.38461	0.0477544	2.58948	999.388	440.273	385.941	96.3136
237157_at	SH3D19	7.35398	0.0477544	2.36565	278.829	90.7302	117.866	49.3978
231798_at	NOG	7.3407	0.0477544	6.03373	235.104	150.135	38.9649	10.2382
204866_at	PHF16	7.33923	0.0477544	2.32694	300.911	97.7365	129.316	52.2443
208464_at	GRIA4	7.28826	0.0477544	3.24738	402.208	205.851	123.856	38.4503
240228_at	CSMD3	7.28333	0.0477544	4.15921	398.133	212.439	95.7234	58.739
200946_x_at	GLUD1	7.27037	0.0477544	2.17158	2141.98	776.547	986.371	265.744
233546_at	LOC283075	7.26023	0.0477544	1.99139	96.075	32.5208	48.2451	10.6704
232833_at	---	7.24782	0.0477544	6.84144	826.875	547.17	120.863	38.2018
226575_at	ZNF462	7.22295	0.0477544	1.95452	985.09	273.777	504.007	151.766
221959_at	C8orf72	7.19176	0.0477544	3.62767	1186.38	634.452	327.037	136.705
203839_s_at	TNK2	7.14724	0.0477544	2.16956	1251.98	509.079	577.066	94.8736
232034_at	LOC203274	7.11299	0.0477544	2.49747	1167.25	469.074	467.373	175.67
212764_at	---	7.08574	0.0477544	2.18709	4157.77	1066.81	1901.05	851.209
229875_at	ZDHHC22	7.04496	0.0477544	2.34099	1096.24	388.145	468.279	188.704
202137_s_at	ZMYND11	7.00052	0.0477544	1.89743	480.952	100.543	253.475	90.2202
241542_at	SOX6	6.96327	0.0477544	3.56247	231.365	130.628	64.945	20.4332
210815_s_at	CALCRL	6.96153	0.0477544	4.45414	699.018	423.663	156.937	70.6974
201830_s_at	NET1	6.8925	0.0477544	2.33326	894.226	331.743	383.252	150.415
208939_at	SEPHS1	6.85784	0.0477544	1.95437	866.903	225.283	443.571	156.429
222630_at	RFXDC2	6.8537	0.0477544	1.99135	1183.85	306.998	594.496	221.223
213825_at	OLIG2	6.85306	0.0477544	2.6703	4510.07	1218.7	1688.98	1163.4
200947_s_at	GLUD1	6.84989	0.0477544	2.05875	2725.93	894.431	1324.07	430.948
228046_at	LOC152485	6.82613	0.0477544	1.83101	1487.72	395.735	812.517	231.933
218856_at	TNFRSF21	6.8139	0.0477544	2.07601	2353.18	715.979	1133.51	419.791
228679_at	---	6.81238	0.0477544	3.95575	1623.56	949.997	410.432	196.458
233271_at	LOC399761	6.79152	0.0477544	1.833	410.329	120.061	223.856	57.7712
218829_s_at	CHD7	6.7756	0.0477544	2.19645	1364.38	516.699	621.177	201.428
1569041_at	JMJD1C	6.72526	0.0477544	2.17353	319.053	112.762	146.79	53.3486
239151_at	LOC399761	6.72256	0.0477544	1.84167	1439.58	453.601	781.672	186.085
227550_at	LOC143381	6.71854	0.0477544	2.31732	614.408	272.251	265.137	65.1857
210432_s_at	SCN3A	6.69953	0.0477544	3.42179	2432.68	1301.44	710.938	379.849
1563367_at	IMP5	6.68353	0.0477544	2.33496	180.036	82.4752	77.1046	16.4551
229545_at	C20orf42	6.67369	0.0477544	3.06492	879.486	495.049	286.952	49.6967
205139_s_at	UST	6.67158	0.0477544	3.51344	1278.54	728.679	363.9	155.639
214862_x_at	---	6.66198	0.0477544	1.94156	144.344	53.7682	74.3444	14.8548
225897_at	---	6.66075	0.0477544	2.1853	5759.36	1304.67	2635.5	1354.4
1569362_at	ALCAM	6.62699	0.0477544	3.18162	199.11	112.764	62.5813	17.2553
215794_x_at	GLUD2	6.62499	0.0477544	2.36622	1177.2	483.051	497.503	188.614
213841_at	---	6.61864	0.0477544	3.64077	6055.84	2794.76	1663.34	1469.66
228248_at	RICTOR	6.61598	0.0477544	2.15969	1666.22	633.929	771.509	251.06
228839_s_at	LOC439994	6.60081	0.0477544	1.83216	1014.87	264.801	553.922	171.868
1562794_at	FGF12	6.58167	0.0477544	1.83845	206.962	72.9519	112.574	20.8057
214581_x_at	TNFRSF21	6.53301	0.0477544	2.51078	1016.15	374.66	404.716	219.321
237330_at	RICTOR	6.51578	0.0477544	1.98805	193.423	74.5082	97.2927	22.0447
229178_at	LOC145786	6.50656	0.0477544	2.19557	299.631	124.583	136.471	39.7707
226310_at	RICTOR	6.48059	0.0477544	2.12849	562.681	230.047	264.357	71.5407
232136_s_at	CTTNBP2	6.47054	0.0477544	2.52707	649.087	239.888	256.853	143.663
209866_s_at	LPHN3	6.43062	0.0477544	1.85786	1680.68	382.4	904.627	331.563
228906_at	CXXC6	6.38438	0.0477544	1.97961	137.834	55.5445	69.6269	13.9629
233241_at	C20orf19	6.3503	0.0477544	2.1677	89.1169	39.8722	41.1113	9.06244
233136_at	PABPC5	6.30528	0.0477544	2.56538	56.9841	29.3611	22.2127	6.17955
221204_s_at	CRTAC1	6.30424	0.0477544	1.85005	207.742	78.027	112.29	20.7097
225777_at	C9orf140	6.28831	0.0477544	2.34463	816.535	379.641	348.257	107.035
1553693_s_at	CBR4	6.28729	0.0477544	1.97163	340.452	107.121	172.675	62.3575
243636_s_at	SH3D19	6.28565	0.0477544	2.01777	70.3354	30.6683	34.858	5.20705
218331_s_at	C10orf18	6.28475	0.0477544	1.8599	654.468	169.112	351.884	125.169
214487_s_at	RAP2A	6.23369	0.0477544	2.62331	907.46	403.951	345.922	182.124
1565620_at	CTGLF1	6.11598	0.0477544	2.00125	356.952	135.881	178.364	55.0661
219732_at	RP11-35N6.1	6.11576	0.0477544	3.93333	3044.99	1497.01	774.152	863.846
228813_at	HDAC4	6.11253	0.0477544	2.21875	796.086	354.593	358.8	114.344
236333_at	MMD2	6.08724	0.0477544	3.82107	1265.88	835.68	331.29	138.689
238311_at	KIAA0776	6.08415	0.0477544	1.93968	83.6737	34.0575	43.1378	9.46372
221623_at	BCAN	6.08053	0.0477544	2.86869	777.298	382.236	270.96	161.411
241888_at	---	6.06644	0.0477544	1.89874	171.357	65.6613	90.2475	22.0072
212761_at	TCF7L2	6.03093	0.0477544	1.8767	2252.04	650.456	1200	435.07
223614_at	C8orf57	6.02953	0.0477544	2.79858	2237.99	1211.29	799.686	348.674
209757_s_at	MYCN	6.01756	0.0477544	2.61523	743.014	401.202	284.11	92.9611
220898_at	---	6.01091	0.0477544	4.32424	894.584	614.29	206.877	119.461
234268_at	SLC2A13	6.00656	0.0477544	2.7714	226.91	132.291	81.8759	19.9348
229694_at	BRWD2	6.00362	0.0477544	2.05277	1005.49	414.292	489.822	148.84
235072_s_at	---	5.97756	0.0477544	2.04498	1980.91	605.144	968.672	435.379
1554281_at	---	5.97039	0.0477544	4.72079	103.186	76.9368	21.8577	2.52161
225163_at	FRMD4A	5.96898	0.0477544	2.0298	658.038	277.55	324.189	89.0521
222898_s_at	DLL3	5.92878	0.0477544	6.24543	1103.04	866.787	176.616	101.593
213549_at	---	5.92705	0.0477544	2.05567	668.152	220.54	325.029	141.936
215323_at	LUZP2	5.91796	0.0477544	2.35652	636.074	307.404	269.922	98.1091
209834_at	CHST3	5.89029	0.0477544	1.82323	804.921	289.568	441.481	114.256
232059_at	DSCAML1	5.88941	0.0477544	2.43474	488.633	219.032	200.692	99.008
226884_at	LRRN1	5.87695	0.0477544	2.59728	1218.07	524.328	468.978	290.189
223865_at	SOX6	5.87525	0.0477544	2.62444	289.915	150.169	110.467	50.0978
229774_at	CXXC4	5.87006	0.0477544	2.04838	335.589	126.854	163.832	62.3371
239935_at	MAMDC1	5.8662	0.0477544	1.84289	43.7127	15.8093	23.7196	6.4698
228170_at	OLIG1	5.85554	0.0477544	1.98647	8421.72	1951.7	4239.53	2074.11
1563721_at	---	5.84596	0.0477544	2.6029	80.8854	43.2757	31.0751	12.4423
233487_s_at	LRRC8A	5.83817	0.0477544	1.83309	617.317	217.172	336.764	95.8617
1560018_at	ARPP-21	5.83685	0.0477544	2.82908	230.776	127.683	81.5728	39.7945
213369_at	PCDH21	5.81994	0.0477544	2.55187	262.441	150.897	102.843	21.0907
212183_at	NUDT4	5.81705	0.0477544	2.04683	868.734	344.679	424.43	152.754
205330_at	MN1	5.80645	0.0477544	3.28774	587.536	327.077	178.705	133.262
221824_s_at	2010-01-04	5.76706	0.0477544	2.17173	1021.42	395.602	470.323	215.985
204493_at	BID	5.7646	0.0477544	2.54644	592.351	293.956	232.619	114.598
221527_s_at	PARD3	5.75324	0.0477544	1.81933	424.099	148.765	233.107	67.1944
244007_at	---	5.71323	0.0477544	1.95959	661.378	221.036	337.508	136.213
226989_at	RGMB	5.71028	0.0477544	2.60535	2333.21	1166.01	895.547	479.486
237268_at	DSCAM	5.69755	0.0477544	2.53931	366.174	177.991	144.202	76.196
211725_s_at	BID	5.6958	0.0477544	2.0045	608.666	237.099	303.65	110.546
213845_at	GRIK2	5.68979	0.0477544	2.11381	940.033	419.505	444.711	151.224
201952_at	ALCAM	5.6881	0.0477544	1.91152	3478.21	993.844	1819.6	771.856
1552754_a_at	IGSF4D	5.68799	0.0477544	2.17962	1100.29	350.913	504.81	279.702
211386_at	MGC12488	5.68472	0.0477544	2.23683	292.438	149.694	130.738	34.6014
224763_at	RPL37	5.67478	0.0477544	1.82052	811.667	263.041	445.843	148.083
230589_at	---	5.63342	0.0477544	2.09409	170.402	60.8632	81.373	38.3923
201761_at	MTHFD2	5.60099	0.0477544	3.03118	1651.94	936.2	544.981	358.29
210875_s_at	TCF8	5.57833	0.0477544	2.59887	1203.71	514.673	463.169	320.632
209511_at	POLR2F	5.55977	0.0477544	2.15691	1833.02	693.951	849.836	422.435
221763_at	JMJD1C	5.55958	0.0477544	1.90038	1104.39	373.206	581.14	222.619
1554132_a_at	KIAA1128	5.52497	0.0477544	2.11526	121.44	58.0145	57.4115	17.8997
240067_at	FGF12	5.51094	0.0477544	2.1593	145.779	70.9092	67.5123	22.1423
1568803_at	---	5.49417	0.0477544	2.86871	232.172	139.979	80.9326	39.9977
1559910_at	FLJ20701	5.4888	0.0477544	2.18782	755.304	359.656	345.23	130.131
244420_at	RUNX1T1	5.46825	0.0477544	2.19193	251.105	122.109	114.559	41.6349
226599_at	KIAA1727	5.46446	0.0477544	1.91939	450.04	216.035	234.471	32.7953
1568780_at	LOC497257	5.45803	0.0477544	3.07981	1080.99	595.741	350.994	273.449
1557545_s_at	RNF165	5.45279	0.0477544	2.37003	90.2491	49.1637	38.0793	13.2684
214239_x_at	PCGF2	5.43596	0.0477544	1.92575	1488.8	407.286	773.103	365.592
242563_at	FCHSD2	5.42549	0.0477544	1.82287	47.4465	20.133	26.0285	5.66478
243713_at	SLC1A1	5.41468	0.0477544	1.97273	59.3222	28.3859	30.0711	6.63636
203037_s_at	MTSS1	5.40854	0.0477544	1.90527	3586.64	1126.28	1882.48	809.955
234307_s_at	KIF26A	5.40732	0.0477544	1.86962	183.098	78.9967	97.9335	24.1555
1552439_s_at	MEGF11	5.40125	0.0477544	5.41469	744.597	528.191	137.514	207.513
201670_s_at	MARCKS	5.38947	0.0477544	1.95317	5022.45	1110.98	2571.43	1360.44
237696_at	TRIM34	5.38087	0.0477544	3.47548	409.311	296.146	117.771	46.2961
227339_at	RGMB	5.36909	0.0477544	2.0293	378.531	166.973	186.533	66.9531
204225_at	HDAC4	5.36372	0.0477544	2.14837	555.831	278.647	258.722	84.0313
207606_s_at	ARHGAP12	5.35826	0.0477544	2.11655	1010.47	301.723	477.415	278.517
204619_s_at	CSPG2	5.35221	0.0477544	2.21119	1663.26	636.143	752.201	423.816
220459_at	MCM3APAS	5.32581	0.0477544	1.92513	165.538	67.1146	85.9879	30.096
228793_at	JMJD1C	5.32038	0.0477544	1.96938	463.496	200.072	235.352	80.416
216511_s_at	TCF7L2	5.31559	0.0477544	2.02495	651.377	208.78	321.676	165.332
242628_at	---	5.31452	0.0477544	1.81579	52.1811	24.4611	28.7374	2.89305
225421_at	ACY1L2	5.29946	0.0477544	1.81901	471.343	153.817	259.12	97.5067
239653_at	RTKN	5.29845	0.0477544	2.5341	481.711	273.504	190.091	87.2233
237003_at	BEST3	5.28523	0.0477544	3.15233	423.813	280.676	134.444	76.768
217853_at	TNS3	5.27087	0.0477544	2.04752	2435.11	1036.4	1189.3	495.265
203838_s_at	TNK2	5.2696	0.0477544	1.95122	232.928	112.784	119.375	27.1141
216035_x_at	TCF7L2	5.2668	0.0477544	1.86465	853.276	224.698	457.606	211.486
209815_at	PTCH1	5.25516	0.0477544	2.78924	1518.19	900.959	544.304	314.247
201681_s_at	DLG5	5.25194	0.0477544	1.8471	1526.04	387.426	826.177	379.125
227143_s_at	BID	5.25092	0.0477544	1.89147	1105.57	432.244	584.501	209.989
226123_at	CHD7	5.22852	0.0477544	1.85897	2112.07	691.662	1136.15	467.743
232015_at	FAM59B	5.22791	0.0477544	1.81262	437.996	144.918	241.637	91.0979
216744_at	LUZP2	5.21618	0.0477544	2.5133	265.586	167.32	105.672	26.739
202431_s_at	MYC	5.19744	0.0477544	2.67084	1107.67	576.558	414.729	285.062
1556598_at	ARPP-21	5.18704	0.0477544	2.82944	63.8806	44.3002	22.5771	4.78162
235106_at	MAML2	5.18189	0.0477544	2.08808	391.627	161.402	187.554	90.0307
229613_at	---	5.17276	0.0477544	3.59066	969.298	749.275	269.95	89.8802
226623_at	PHYHIPL	5.16456	0.0477544	1.89423	4177.14	1548.38	2205.19	882.915
238735_at	TCF12	5.16134	0.0477544	3.02411	126.886	85.4825	41.9582	21.5971
202315_s_at	BCR	5.16058	0.0477544	1.92985	1116.35	483.941	578.466	197.477
227099_s_at	LOC387763	5.15923	0.0477544	2.43447	1884.7	918.694	774.172	468.547
204671_s_at	ANKRD6	5.15781	0.0477544	1.92556	516.401	219.729	268.182	94.2308
227340_s_at	RGMB	5.14477	0.0477544	2.7975	767.188	468.367	274.24	159.934
231361_at	NLGN1	5.14368	0.0477544	1.97056	354.637	124.656	179.967	85.6918
213467_at	RND2	5.1436	0.0477544	1.97391	1549	650.752	784.739	311.903
209867_s_at	LPHN3	5.126	0.0477544	1.84113	1092.54	298.252	593.404	271.51
219132_at	PELI2	5.10876	0.0477544	1.83931	417.808	144.763	227.154	90.0894
224610_at	SNHG1	5.07968	0.0477544	1.95509	1522.17	551.439	778.57	362.207
220443_s_at	VAX2	5.07878	0.0477544	2.09114	269.03	95.3968	128.653	72.6318
234645_at	MAML2	5.0722	0.0477544	2.18379	405.086	157.891	185.496	109.76
224833_at	ETS1	5.05126	0.0477544	2.37773	784.993	410.527	330.143	176.804
240665_at	CUGBP2	5.0498	0.0477544	1.90626	360.854	140.522	189.3	76.861
221731_x_at	CSPG2	5.02939	0.0477544	1.99853	5423.05	1904.12	2713.52	1395.11
244693_at	USP54	5.02763	0.0477544	1.949	349.8	154.878	179.476	66.1735
220115_s_at	CDH10	5.01766	0.0477544	1.90416	1079.27	412.402	566.792	237.236
219370_at	RPRM	5.00927	0.0477544	1.88858	752.946	353.904	398.685	109.372
1556599_s_at	ARPP-21	5.00641	0.0477544	2.77734	186.574	92.276	67.1771	57.7009
213601_at	SLIT1	4.97407	0.0477544	2.25699	2617.14	1372.35	1159.57	545.117
204072_s_at	FRY	4.96229	0.0477544	2.166	1185.61	584.849	547.374	253.746
215469_at	---	4.95482	0.0477544	2.71089	79.0886	53.9978	29.1744	10.6779
226312_at	RICTOR	4.95055	0.0477544	1.91757	1493.29	550.303	778.742	353.646
1559410_at	---	4.91849	0.0477544	2.27323	1014.34	496.779	446.213	248.863
1553344_at	PCDH15	4.89856	0.0477544	2.78387	60.8691	44.749	21.865	3.00731
227722_at	RPS23	4.88585	0.0477544	1.80187	823.278	266.024	456.901	193.719
231131_at	RP1-32F7.2	4.87616	0.0477544	2.28049	167.551	92.2677	73.4716	34.1799
201490_s_at	PPIF	4.86809	0.0477544	1.90961	968.811	372.512	507.335	226.162
224520_s_at	BEST3	4.86065	0.0477544	4.36868	653.381	574.247	149.56	69.4877
241682_at	KLHL23	4.85991	0.0477544	1.81652	441.445	131.042	243.016	111.511
227933_at	LRRN6A	4.85179	0.0477544	1.93779	1094.17	373.303	564.647	288.307
201829_at	NET1	4.83843	0.0477544	1.95858	793.71	287.835	405.247	205.977
227444_at	ARMCX4	4.82952	0.0477544	1.82609	204.247	51.4053	111.849	55.8383
213411_at	---	4.82491	0.0477544	2.02387	1045.5	405.204	516.584	275.217
237803_x_at	ZBTB20	4.82395	0.0477544	2.06448	176.455	85.9943	85.4722	37.0264
204620_s_at	CSPG2	4.81858	0.0477544	1.99729	5474.94	1918.99	2741.18	1508.21
241044_x_at	---	4.79821	0.0477544	2.24608	130.336	58.2887	58.0283	36.4712
205893_at	NLGN1	4.7893	0.0477544	1.93893	575.343	185.292	296.733	159.448
241435_at	ETS1	4.7857	0.0477544	1.86233	217.605	108.305	116.845	29.0505
227273_at	---	4.78278	0.0477544	1.98086	350.044	112.646	176.714	100.426
1555544_a_at	IGSF4D	4.77912	0.0477544	2.06315	251.662	100.676	121.98	67.937
244669_at	SNORD50A	4.77873	0.0477544	1.85062	97.7921	43.179	52.8427	18.2299
212758_s_at	TCF8	4.77016	0.0477544	3.03939	1368.31	893.169	450.192	365.059
223283_s_at	TSHZ1	4.76918	0.0477544	1.89808	1042.37	433.47	549.17	230.322
226649_at	PANK1	4.75658	0.0477544	1.86451	214.754	79.5931	115.18	51.4092
1564426_x_at	LOC389634	4.75641	0.0477544	2.33772	222.84	141.329	95.3236	32.2515
213664_at	SLC1A1	4.749	0.0477544	2.78616	1022.14	539.197	366.865	330.894
238962_at	---	4.7439	0.0477544	1.8703	70.6123	27.5386	37.7545	16.3409
232333_at	MAML2	4.73648	0.0477544	1.92324	1722.96	518.714	895.865	492.882
225864_at	FAM84B	4.73211	0.0477544	2.65347	1979.91	1244.42	746.161	464.112
217897_at	FXYD6	4.73087	0.0477544	1.82114	6737.39	2104.42	3699.55	1735.9
213001_at	ANGPTL2	4.72566	0.0477544	3.19983	2552.51	1617.49	797.7	785.782
230570_at	---	4.71956	0.0477544	1.97688	171.093	74.8787	86.5468	40.0332
244414_at	MAML2	4.71578	0.0477544	2.32132	1756.52	662.471	756.692	586.178
236761_at	LHFPL3	4.66679	0.0477544	4.17793	3885.46	1818.74	929.996	1809.6
203146_s_at	GABBR1	4.66646	0.0477544	1.89418	4567.46	1984.62	2411.31	997.231
213578_at	BMPR1A	4.65751	0.0477544	2.25556	647.7	257.208	287.157	207.789
242405_at	MAML2	4.64079	0.0477544	2.0981	906.395	334.186	432.008	276.679
230445_at	LOC388419	4.63965	0.0477544	2.00834	228.959	124.977	114.004	37.1973
1555867_at	LOC200169	4.63694	0.0477544	1.89321	603.146	170.823	318.584	177.19
223282_at	TSHZ1	4.62595	0.0477544	1.86406	1036.64	389.303	556.118	258.053
1552752_a_at	IGSF4D	4.61247	0.0477544	2.06014	432.847	172.132	210.105	124.367
230895_at	---	4.60873	0.0477544	1.93348	42.6173	24.9535	22.0418	2.28031
244300_at	LPHN3	4.60391	0.0477544	3.33896	298.164	220.258	89.2984	77.2224
1560265_at	GRIK2	4.59947	0.0477544	2.09638	252.766	139.068	120.573	49.3797
212486_s_at	FYN	4.59917	0.0477544	1.90682	1563.33	511.13	819.863	444.568
201147_s_at	TIMP3	4.59724	0.0477544	1.96919	1012.82	424.733	514.333	259.458
235874_at	PRSS35	4.59425	0.0477544	3.45315	111.413	96.1691	32.2641	9.25087
223471_at	RAB3IP	4.59264	0.0477544	2.25153	1104.2	548.183	490.423	305.234
240218_at	---	4.59188	0.0477544	2.76551	224.707	149.935	81.2533	54.846
214393_at	RND2	4.5633	0.0477544	2.23118	442.685	264.517	198.408	86.4241
204529_s_at	TOX	4.55865	0.0477544	3.27019	658.045	469.924	201.225	185.88
212279_at	TMEM97	4.52982	0.0477544	1.84062	1067.75	492.486	580.102	210.015
1558569_at	MAML2	4.51709	0.0477544	2.04655	674.366	280.778	329.514	192.386
209682_at	CBLB	4.51455	0.0477544	2.10314	572.556	317.752	272.238	118.196
230204_at	---	4.50724	0.0477544	3.50839	676.849	567.821	192.923	126.377
219743_at	HEY2	4.48785	0.0477544	2.46436	989.285	588.517	401.438	263.957
229506_at	---	4.48565	0.0477544	1.80415	250.181	100.182	138.67	57.8613
203131_at	PDGFRA	4.46971	0.0477544	3.62667	4237.82	2508.87	1168.51	1738.76
214279_s_at	NDRG2	4.46713	0.0477544	1.98828	3048.4	1442.59	1533.18	741.755
205523_at	HAPLN1	4.46628	0.0477544	4.16396	366.975	327.62	88.1314	77.3337
242268_at	CUGBP2	4.43046	0.0477544	1.82751	210.513	85.8638	115.191	50.5723
214954_at	SUSD5	4.42214	0.0477544	4.7139	315.355	279.782	66.8988	88.4065
221911_at	ETV1	4.39809	0.0477544	2.45117	2875.41	1475.01	1173.08	948.745
209684_at	RIN2	4.39678	0.0477544	1.9055	1781.3	712.988	934.822	482.669
236095_at	NTRK2	4.37321	0.0477544	1.9319	481.52	203.54	249.247	129.575
228462_at	IRX2	4.36285	0.0477544	3.03248	174.743	140.122	57.6239	34.319
239952_at	---	4.34641	0.0477544	1.96284	360.339	197.489	183.581	69.1777
220345_at	LRRTM4	4.34171	0.0477544	2.58177	96.8837	67.7324	37.5262	21.8856
219489_s_at	NXN	4.3403	0.0477544	1.81512	587.571	245.462	323.71	141.219
1558045_a_at	LOC441528	4.33959	0.0477544	2.62348	125.916	86.974	47.9958	30.76
219093_at	FLJ20701	4.32758	0.0477544	2.26277	1188.79	558.384	525.369	389.014
237471_at	LOC154822	4.32404	0.0477544	4.94654	135.408	141.218	27.3743	3.34724
1570120_at	---	4.32158	0.0477544	3.26788	149.869	135.922	45.8612	4.55118
219090_at	SLC24A3	4.31293	0.0477544	2.19274	908.464	535.621	414.305	213.977
226756_at	---	4.30744	0.0477544	2.78196	513.964	244.449	184.749	209.082
1559072_a_at	LRRC62	4.29459	0.0477544	1.91831	976.844	382.304	509.221	283.157
201416_at	SOX4	4.28942	0.0477544	2.39145	896.812	289.64	375.007	365.987
1555492_a_at	BEST3	4.2634	0.0477544	3.19575	102.46	92.6641	32.0615	6.89944
215473_at	LOC645256	4.26231	0.0477544	1.9835	57.9727	33.6202	29.2275	10.5714
219107_at	BCAN	4.2572	0.0477544	2.12893	7458.5	2275.54	3503.4	2777.45
232216_at	YME1L1	4.23488	0.0477544	1.86376	298.217	154.865	160.008	58.9225
205830_at	CLGN	4.23294	0.0477544	2.33995	106.815	57.3071	45.6486	34.1757
203002_at	AMOTL2	4.22035	0.0477544	1.85507	1319.1	523.835	711.077	366.046
228108_at	---	4.19231	0.0477544	2.18702	823.477	399.934	376.528	264.658
57588_at	SLC24A3	4.18405	0.0477544	2.01881	912.063	513.134	451.783	206.417
222357_at	ZBTB20	4.18191	0.0477544	1.92919	1509.35	669.859	782.379	422.105
44783_s_at	HEY1	4.14392	0.0477544	1.80717	6984.26	2326.06	3864.75	2091.35
227921_at	---	4.12077	0.0477544	2.07383	1021.02	502.675	492.338	306.928
238663_x_at	GRIA4	4.10599	0.0477544	2.90089	508.139	280.375	175.167	212.877
230913_at	---	4.07057	0.0477544	2.29079	580.046	374.453	253.208	150.725
227525_at	GLCCI1	4.06007	0.0477544	2.20795	2292.56	1047.73	1038.32	820.006
213194_at	ROBO1	4.05944	0.0477544	2.13196	1797.81	1148.06	843.263	393.859
213228_at	PDE8B	4.05218	0.0477544	1.81186	1628.16	786.093	898.611	379.649
1569629_x_at	LOC389906	4.03206	0.0477544	1.9204	102.784	64.4796	53.5225	14.5867
225706_at	GLCCI1	3.97727	0.0477544	2.25315	2438.13	1004.37	1082.1	965.362
218573_at	MAGEH1	3.94363	0.0477544	2.01373	2089.73	469.37	1037.74	840.847
236120_at	HADHA	3.92928	0.0477544	1.90305	176.676	78.851	92.8382	53.5769
201417_at	SOX4	3.87988	0.0477544	2.06926	4161.37	1055.26	2011.04	1730.9
239481_at	RP1-32F7.2	3.87698	0.0477544	2.15964	257.29	177.601	119.136	55.9052
1558706_a_at	ATOH8	3.87232	0.0477544	4.68943	209.912	239.324	44.7628	17.8719
229734_at	LOC283174	3.86662	0.0477544	2.01692	611.802	400.424	303.334	122.031
215767_at	ZNF804A	3.85806	0.0477544	2.93088	276.619	259.293	94.3808	37.8416
218839_at	HEY1	3.84381	0.0477544	1.92678	3974.53	1557.58	2062.79	1373.69
230509_at	SNX22	3.81616	0.0477544	1.84077	840.209	504.845	456.444	153.724
232028_at	ZNF678	3.79877	0.0477544	2.02119	447.588	260.977	221.448	124.777
243261_at	LOC154822	3.78844	0.0477544	2.79805	395.113	377.526	141.21	20.3951
225162_at	SH3D19	3.76172	0.0477544	1.90623	444.01	255.833	232.926	110.17
204653_at	TFAP2A	3.75882	0.0477544	4.23556	487.835	558.646	115.176	29.0229
235385_at	---	3.73678	0.0477544	1.83579	206.694	90.6054	112.591	64.451
232668_at	C8orf72	3.70122	0.0477544	4.35267	450.439	520.512	103.486	59.3817
205952_at	KCNK3	3.6764	0.0477544	2.29806	238.46	183.006	103.765	57.033
223315_at	NTN4	3.6312	0.0477544	2.37495	170.847	131.731	71.9372	46.8665
215962_at	SNTG1	3.56576	0.0477544	1.90942	41.9259	31.2575	21.9574	3.01875
208167_s_at	MMP16	3.5256	0.0477544	2.15397	142.783	120.463	66.2881	13.7837
214633_at	SOX3	3.36646	0.0477544	1.95423	148.82	108.119	76.1526	33.2713
204563_at	SELL	3.32807	0.0477544	5.12822	1152.5	1568.81	224.736	93.8283
239537_at	ST8SIA2	3.22914	0.0477544	2.06062	69.2007	61.575	33.5826	5.91626
209652_s_at	PGF	3.19222	0.0477544	1.94506	333.564	280.709	171.493	35.6063
229796_at	SIX4	3.18218	0.0477544	2.04977	200.508	178.616	97.8197	22.0873
1556573_s_at	LOC286178	3.06949	0.0477544	12.1444	998.811	1688.99	82.2445	14.4086
239010_at	LOC440157	2.99977	0.0477544	2.03436	43.2851	41.4046	21.277	1.66608
1559712_at	LOC154822	2.57298	0.0477544	2.78548	222.55	313.546	79.8966	4.30664
237898_at	---	2.3213	0.0477544	11.397	272.119	604.94	23.8763	2.16926
231029_at	F5	1.73776	0.0477544	6.9445	175.098	487.861	25.214	4.09694
210690_at	KLRC4	1.7232	0.0477544	3.71315	75.3158	180.65	20.2835	0.94038
205422_s_at	ITGBL1	-1.15185	0.0477544	-2.65176	26.2697	2.35519	69.6608	124.932
208607_s_at	SAA1	-1.2453	0.0477544	-2.2605	59.53	11.3537	134.567	199.738
209398_at	HIST1H1C	-1.351	0.0477544	-2.01549	83.9822	26.8873	169.265	208.77
209960_at	HGF	-1.51733	0.0477544	-2.57077	35.3839	10.0494	90.9637	121.345
227642_at	TFCP2L1	-1.52222	0.0477544	-3.28847	107.469	26.3778	353.409	535.634
226237_at	COL8A1	-1.53718	0.0477544	-5.68671	31.8771	5.72108	181.276	322.326
209138_x_at	IGL@	-1.60206	0.0477544	-2.08042	83.872	14.328	174.489	187.41
206515_at	CYP4F3	-1.62173	0.0477544	-3.53195	32.9404	6.63216	116.344	170.526
217022_s_at	IGHA1	-1.70063	0.0477544	-2.02553	57.2284	7.9985	115.918	114.362
226863_at	FAM110C	-1.71873	0.0477544	-4.21363	50.3423	19.2751	212.124	311.985
222379_at	---	-1.73489	0.0477544	-2.34985	82.6612	21.5092	194.242	212.938
229012_at	C9orf24	-1.74555	0.0477544	-4.51897	102.614	64.5563	463.708	685.051
220010_at	KCNE1L	-1.75487	0.0477544	-3.34817	86.0946	56.8244	288.259	380.626
204361_s_at	SKAP2	-1.85237	0.0477544	-3.55489	66.3652	17.375	235.921	303.414
242234_at	BIRC4BP	-1.85245	0.0477544	-2.29706	67.0671	10.3066	154.057	155.63
218400_at	OAS3	-1.88534	0.0477544	-2.40787	257.069	72.3583	618.99	635.265
208096_s_at	COL21A1	-1.92227	0.0477544	-2.58864	66.0907	27.0333	171.085	180.459
227819_at	LGR6	-1.94378	0.0477544	-2.74732	122.483	19.4913	336.501	364.993
213797_at	RSAD2	-1.94547	0.0477544	-3.05161	111.375	43.5219	339.873	388.706
218806_s_at	VAV3	-1.98681	0.0477544	-3.08828	47.8115	14.7388	147.655	166.447
231292_at	EID3	-1.99755	0.0477544	-1.91034	36.091	9.4709	68.946	54.2674
205158_at	RNASE4	-2.0087	0.0477544	-2.25916	71.3429	28.5634	161.175	147.376
203373_at	SOCS2	-2.01627	0.0477544	-4.58657	214.237	212.632	982.613	1257.76
229331_at	SPATA18	-2.0181	0.0477544	-1.82833	22.5501	2.70973	41.2289	30.6564
221276_s_at	SYNC1	-2.03551	0.0477544	-2.3217	67.9752	27.7896	157.818	145.479
239218_at	PDE1C	-2.03813	0.0477544	-2.64124	241.314	216.358	637.367	631.887
210538_s_at	BIRC3	-2.05812	0.0477544	-1.90394	23.5472	3.02141	44.8327	34.2554
214453_s_at	IFI44	-2.06032	0.0477544	-2.85198	304.96	185.716	869.742	902.62
59625_at	NOL3	-2.09512	0.0477544	-2.20994	140.589	42.0758	310.693	268.148
213397_x_at	RNASE4	-2.09717	0.0477544	-3.02476	71.6472	42.8823	216.715	228.041
203234_at	UPP1	-2.1067	0.0477544	-2.62904	144.897	75.2112	380.939	368.98
206898_at	CDH19	-2.13883	0.0477544	-3.74659	80.8421	42.7856	302.883	343.398
204485_s_at	TOM1L1	-2.15371	0.0477544	-2.95201	41.2079	7.53619	121.646	123.793
239108_at	MLSTD1	-2.15441	0.0477544	-2.78385	62.9845	26.1149	175.339	172.286
204776_at	THBS4	-2.1729	0.0477544	-3.63753	390.37	84.0725	1419.98	1570.79
220230_s_at	CYB5R2	-2.18519	0.0477544	-2.37619	112.716	51.6269	267.835	233.482
234986_at	---	-2.19818	0.0477544	-2.92722	62.2238	27.8224	182.143	180.198
221567_at	NOL3	-2.19902	0.0477544	-1.95765	195.868	48.7501	383.442	281.457
205552_s_at	OAS1	-2.22688	0.0477544	-2.70996	54.799	21.1111	148.503	139.009
216899_s_at	SKAP2	-2.23112	0.0477544	-3.28897	58.4144	23.3926	192.123	198.289
222108_at	AMIGO2	-2.23878	0.0477544	-2.53972	105.022	70.6782	266.726	235.944
216840_s_at	LAMA2	-2.24114	0.0477544	-2.03604	143.257	26.5917	291.675	219.089
218966_at	MYO5C	-2.25401	0.0477544	-2.22765	256.154	70.5393	570.621	460.864
202238_s_at	NNMT	-2.2653	0.0477544	-5.17491	125.013	31.2123	646.931	763.919
244731_at	MAOB	-2.27831	0.0477544	-1.99823	27.3455	5.00786	54.6426	39.6289
221477_s_at	MGC5618	-2.28041	0.0477544	-2.19218	1142.3	500.048	2504.12	1958.81
204362_at	SKAP2	-2.30715	0.0477544	-3.23718	180.64	70.5208	584.766	579.474
201136_at	PLP2	-2.31234	0.0477544	-2.23409	276.61	81.4107	617.973	487.289
229437_at	BIC	-2.31585	0.0477544	-1.86586	22.5472	3.51358	42.0699	27.8833
209911_x_at	HIST1H2BD	-2.32781	0.0477544	-1.87023	209.641	105.771	392.078	252.426
228415_at	---	-2.32948	0.0477544	-2.25887	438.673	256.257	990.904	771.757
44790_s_at	C13orf18	-2.33275	0.0477544	-3.53311	62.0605	53.1468	219.266	221.327
218543_s_at	PARP12	-2.33581	0.0477544	-2.19697	157.186	61.8821	345.332	264.675
205499_at	SRPX2	-2.35066	0.0477544	-2.28309	58.6025	10.0963	133.795	105.926
223923_at	C21orf62	-2.36141	0.0477544	-2.3623	209.456	73.1266	494.798	398.466
202071_at	SDC4	-2.37532	0.0477544	-3.3871	321.293	205.201	1088.25	1064.11
221185_s_at	IQCG	-2.3792	0.0477544	-1.86339	252.967	113.843	471.375	297.056
209417_s_at	IFI35	-2.38391	0.0477544	-2.19907	182.346	56.9239	400.991	302.355
202733_at	P4HA2	-2.39114	0.0477544	-2.0517	147.316	42.6262	302.248	213.44
206133_at	BIRC4BP	-2.40647	0.0477544	-2.90335	118.67	22.08	344.542	311.029
202237_at	NNMT	-2.40944	0.0477544	-9.23825	98.2787	49.3278	907.924	1114.11
202345_s_at	FABP5	-2.41552	0.0477544	-5.11359	436.937	572.411	2234.32	2444.97
209909_s_at	---	-2.41852	0.0477544	-3.51064	39.358	29.8347	138.171	134.373
225911_at	NPNT	-2.41873	0.0477544	-8.14298	100.013	56.4644	814.407	979.036
204933_s_at	TNFRSF11B	-2.42092	0.0477544	-1.9641	28.2203	3.58178	55.4274	37.2141
203423_at	RBP1	-2.42185	0.0477544	-5.25589	313.512	877.701	1647.78	1753.27
1557051_s_at	---	-2.43898	0.0477544	-1.8579	48.9206	15.1489	90.8899	56.3762
228642_at	---	-2.44279	0.0477544	-2.01101	72.4347	28.1201	145.667	98.0529
AFFX-HUMISGF3A/M97935_3_at	STAT1	-2.4632	0.0477544	-1.84476	959.778	441.797	1770.56	1060.52
225612_s_at	B3GNT5	-2.46777	0.0477544	-2.10238	165.533	171.592	348.013	223.664
213519_s_at	LAMA2	-2.47292	0.0477544	-1.97412	110.826	22.6454	218.785	144.181
205208_at	ALDH1L1	-2.47316	0.0477544	-2.70882	457.868	160.773	1240.28	1045.01
240407_at	---	-2.48861	0.0477544	-2.91913	66.1793	23.501	193.186	168.703
202709_at	FMOD	-2.49279	0.0477544	-3.37351	166.126	28.7493	560.429	524.344
202270_at	GBP1	-2.5025	0.0477544	-3.30673	172.937	153.451	571.857	520.987
226325_at	ADSSL1	-2.50404	0.0477544	-2.19563	104.515	38.1358	229.477	163.995
219209_at	IFIH1	-2.50588	0.0477544	-2.51467	59.9768	31.3422	150.822	118.824
229177_at	MGC45438	-2.50916	0.0477544	-2.01797	133.522	35.776	269.443	178.433
206172_at	IL13RA2	-2.51198	0.0477544	-6.83541	70.3134	62.6153	480.621	540.494
202357_s_at	CFB	-2.52232	0.0477544	-1.96593	129.013	19.213	253.63	163.473
228199_at	SLC26A1	-2.52497	0.0477544	-1.88949	175.342	55.4579	331.307	202.269
217546_at	MT1M	-2.52731	0.0477544	-4.64896	226.881	172.323	1054.76	1081.73
201785_at	RNASE1	-2.54268	0.0477544	-2.18697	829.694	374.909	1814.51	1265.64
220591_s_at	EFHC2	-2.54582	0.0477544	-1.85767	69.7732	47.688	129.615	72.7743
215464_s_at	TAX1BP3	-2.5507	0.0477544	-1.90365	207.743	55.3656	395.469	241.929
202086_at	MX1	-2.55575	0.0477544	-3.89413	464.047	248.804	1807.06	1736.72
228057_at	DDIT4L	-2.55922	0.0477544	-1.81978	106.007	42.2814	192.911	109.86
219863_at	HERC5	-2.56173	0.0477544	-3.26418	153.929	60.318	502.452	449.839
218918_at	MAN1C1	-2.57254	0.0477544	-2.32748	433.891	267.313	1009.87	725.853
1554830_a_at	STEAP3	-2.57353	0.0477544	-2.21895	26.9153	3.62295	59.7238	42.2284
209740_s_at	PNPLA4	-2.58453	0.0477544	-2.23092	149.607	49.9394	333.761	234.497
225171_at	ARHGAP18	-2.58743	0.0477544	-2.72979	108.089	47.8384	295.06	238.017
220615_s_at	MLSTD1	-2.60775	0.0477544	-2.18749	140.991	45.9143	308.416	211.229
230022_at	MGC34761	-2.61116	0.0477544	-2.22137	52.8073	10.4515	117.305	81.6934
228198_s_at	MRPS9	-2.62665	0.0477544	-1.9487	152.683	53.8333	297.533	180.156
226603_at	SAMD9L	-2.6345	0.0477544	-3.04832	185.993	97.6286	566.965	476.187
221898_at	PDPN	-2.63951	0.0477544	-5.19661	150.377	274.417	781.45	776.47
202446_s_at	PLSCR1	-2.64213	0.0477544	-3.10673	445.917	224.24	1385.34	1171.89
233786_at	---	-2.66067	0.0477544	-3.58757	65.9496	71.4903	236.599	208.55
204163_at	EMILIN1	-2.66963	0.0477544	-1.94256	84.4688	37.4203	164.086	96.4483
1558692_at	C1orf85	-2.67358	0.0477544	-2.11024	50.6859	18.0531	106.959	69.0011
219352_at	HERC6	-2.68484	0.0477544	-2.2889	220.047	107.418	503.667	344.653
216336_x_at	MT1M	-2.686	0.0477544	-1.83745	1402.3	441.537	2576.66	1426.78
225548_at	SHROOM3	-2.68816	0.0477544	-2.26807	154.037	43.3735	349.367	239.651
202833_s_at	SERPINA1	-2.68985	0.0477544	-2.14774	147.676	97.9633	317.171	200.942
203397_s_at	GALNT3	-2.69255	0.0477544	-2.39164	32.3304	5.38338	77.3226	55.3306
231577_s_at	GBP1	-2.69432	0.0477544	-3.49132	169.284	143.107	591.025	512.326
231876_at	TRIM56	-2.71966	0.0477544	-2.07311	175.328	67.9004	363.474	225.964
1566342_at	---	-2.73701	0.0477544	-2.19409	156.566	70.531	343.519	222.738
228243_at	PAXIP1	-2.74433	0.0477544	-1.89068	128.147	57.2175	242.285	133.798
204698_at	ISG20	-2.74478	0.0477544	-1.83344	77.6886	20.6632	142.437	77.2949
228100_at	C1orf88	-2.74562	0.0477544	-1.89209	245.431	199.027	464.378	237.347
205675_at	MTTP	-2.75877	0.0477544	-2.11139	34.919	7.08174	73.7278	46.4712
227628_at	LOC493869	-2.76245	0.0477544	-3.04202	41.0485	16.2198	124.87	100.187
224496_s_at	TMEM107	-2.76445	0.0477544	-2.25565	48.6842	13.5722	109.815	72.9077
228617_at	BIRC4BP	-2.76749	0.0477544	-4.21903	260.901	140.118	1100.75	1003.14
1556643_at	FAM125A	-2.77469	0.0477544	-1.85795	105.736	14.6877	196.453	108.092
223218_s_at	NFKBIZ	-2.7801	0.0477544	-2.22716	166.948	83.9477	371.818	239.401
209641_s_at	ABCC3	-2.78015	0.0477544	-2.28446	144.404	22.4183	329.886	220.883
209154_at	TAX1BP3	-2.78531	0.0477544	-2.04608	1170.27	353.288	2394.46	1442.93
202269_x_at	GBP1	-2.78776	0.0477544	-3.15844	183.177	112.595	578.555	465.729
1558856_at	DMRTA2	-2.79304	0.0477544	-2.89825	100.631	10.4532	291.652	226.747
221605_s_at	PIPOX	-2.79587	0.0477544	-2.8965	261.536	105.917	757.539	585.103
220407_s_at	TGFB2	-2.82455	0.0477544	-2.29919	106.803	54.5671	245.559	159.758
205226_at	PDGFRL	-2.83005	0.0477544	-1.82105	78.2954	13.0389	142.58	74.9483
209581_at	HRASLS3	-2.83859	0.0477544	-2.0687	743.288	378.118	1537.64	901.257
231040_at	RORB	-2.84726	0.0477544	-2.51286	458.375	430.448	1151.83	767.339
1558738_at	NOL3	-2.85216	0.0477544	-1.85688	121.396	24.9964	225.418	120.071
218807_at	VAV3	-2.85382	0.0477544	-3.58483	130.451	70.6215	467.644	389.683
201850_at	CAPG	-2.8619	0.0477544	-2.34389	212.981	92.8125	499.203	327.205
202430_s_at	PLSCR1	-2.87753	0.0477544	-3.71664	96.368	53.1013	358.165	300.135
210978_s_at	TAGLN2	-2.87795	0.0477544	-2.42924	441.956	204.518	1073.62	717.999
205729_at	OSMR	-2.88124	0.0477544	-2.50487	66.3385	17.2834	166.169	114.469
208782_at	FSTL1	-2.88378	0.0477544	-2.0162	1094.7	854.945	2207.13	1177.12
1552703_s_at	CASP1	-2.9041	0.0477544	-2.38274	42.1114	20.3173	100.341	65.4252
202869_at	OAS1	-2.90865	0.0477544	-2.33292	171.94	48.3086	401.123	259.79
226388_at	TCEA3	-2.92308	0.0477544	-2.04942	53.1788	12.4935	108.986	62.8951
203964_at	NMI	-2.92619	0.0477544	-2.15058	205.429	71.8657	441.791	264.565
230036_at	SAMD9L	-2.93718	0.0477544	-2.34316	118.613	49.935	277.928	177.499
225639_at	SKAP2	-2.93821	0.0477544	-3.45079	154.477	91.7284	533.069	423.954
225314_at	OCIAD2	-2.94829	0.0477544	-3.37436	270.235	127.712	911.87	717.902
211744_s_at	CD58	-2.95443	0.0477544	-2.74965	92.1244	39.4323	253.31	179.463
204646_at	DPYD	-2.97219	0.0477544	-4.31643	113.872	77.4585	491.52	418.958
217995_at	SQRDL	-2.97422	0.0477544	-1.99334	187.956	64.9673	374.66	204.684
204174_at	ALOX5AP	-2.98287	0.0477544	-2.1305	437.855	291.599	932.85	523.153
201841_s_at	HSPB1	-2.98451	0.0477544	-2.64243	1224.81	487.818	3236.48	2217.15
202863_at	SP100	-2.9855	0.0477544	-3.09694	75.8568	24.7913	234.924	176.111
225665_at	ZAK	-2.98666	0.0477544	-1.85138	291.869	181.387	540.36	254.628
222871_at	KLHDC8A	-2.98813	0.0477544	-2.16978	877.865	345.439	1904.77	1121.66
49452_at	ACACB	-2.992	0.0477544	-1.9221	139.056	51.0534	267.279	138.947
203041_s_at	LAMP2	-3.00642	0.0477544	-1.98029	584.967	231.074	1158.4	617.925
227417_at	MOSC2	-3.00987	0.0477544	-2.51844	189.547	125.34	477.361	308.515
209448_at	HTATIP2	-3.01857	0.0477544	-2.08395	122.508	51.6934	255.301	142.722
212859_x_at	MT1E	-3.03596	0.0477544	-2.1878	2783.62	948.734	6089.99	3568.95
203739_at	ZNF217	-3.04175	0.0477544	-2.66348	79.3239	25.3532	211.277	143.108
204205_at	APOBEC3G	-3.05062	0.0477544	-1.84143	62.265	17.9139	114.657	55.9833
227325_at	LOC255783	-3.06442	0.0477544	-1.83189	469.234	147.179	859.584	413.569
235775_at	TMTC2	-3.06835	0.0477544	-1.92289	492.67	434.146	947.352	420.421
223000_s_at	F11R	-3.07921	0.0477544	-2.77258	117.553	69.4014	325.926	220.719
202283_at	SERPINF1	-3.10053	0.0477544	-2.02675	390.286	380.287	791.011	366.103
208659_at	CLIC1	-3.10228	0.0477544	-3.0194	467.866	194.533	1412.67	1003.63
213836_s_at	WIPI1	-3.10354	0.0477544	-1.96253	91.1665	39.4084	178.917	90.8839
1552701_a_at	COP1	-3.11396	0.0477544	-1.83638	195.676	110.888	359.336	161.733
201012_at	ANXA1	-3.12128	0.0477544	-7.61722	317.837	327.881	2421.04	2226.55
203561_at	FCGR2A	-3.12936	0.0477544	-1.81938	74.4337	27.128	135.423	62.6514
226621_at	---	-3.14088	0.0477544	-3.09678	213.09	79.0317	659.895	469.524
203042_at	LAMP2	-3.14751	0.0477544	-2.0212	346.376	152.681	700.095	361.815
203729_at	EMP3	-3.14835	0.0477544	-5.27441	220.178	166.595	1161.31	986.607
239292_at	---	-3.15161	0.0477544	-1.80583	37.0518	8.88034	66.9091	30.9862
211564_s_at	PDLIM4	-3.15456	0.0477544	-6.88904	49.6286	27.9549	341.893	306.843
218876_at	CGI-38	-3.15575	0.0477544	-2.82329	253.483	178.765	715.656	474.291
231098_at	---	-3.16138	0.0477544	-2.45026	32.9063	4.23385	80.6289	50.0046
212792_at	DPY19L1	-3.16872	0.0477544	-2.23538	402.346	170.226	899.397	510.588
218802_at	CCDC109B	-3.1854	0.0477544	-3.26655	115.479	140.91	377.218	259.697
205775_at	FAM50B	-3.18553	0.0477544	-1.80723	168.397	53.08	304.332	138.065
227314_at	ITGA2	-3.19154	0.0477544	-2.11266	103.85	51.8539	219.399	116.166
215388_s_at	CFH	-3.19473	0.0477544	-2.78233	86.3548	32.6233	240.267	158.636
228121_at	TGFB2	-3.19503	0.0477544	-3.6438	350.439	324.12	1276.93	942.787
201641_at	BST2	-3.1958	0.0477544	-3.76508	196.099	111.387	738.33	558.928
204363_at	F3	-3.19733	0.0477544	-2.29286	779.903	452.02	1788.21	1011.8
226098_at	IFT80	-3.19893	0.0477544	-1.94102	462.454	189.345	897.631	437.318
1558956_s_at	IFT80	-3.19982	0.0477544	-2.03235	426.785	206.723	867.376	440.298
214657_s_at	TncRNA	-3.21061	0.0477544	-3.48719	71.7205	35.1065	250.103	183.119
235305_s_at	ECHDC2	-3.21341	0.0477544	-2.4489	193.72	48.2822	474.401	288.31
218950_at	CENTD3	-3.22062	0.0477544	-2.01739	226.171	72.1898	456.275	233.153
200621_at	CSRP1	-3.2397	0.0477544	-2.12416	1936.28	1066.79	4112.95	2138.78
218552_at	ECHDC2	-3.24202	0.0477544	-2.94941	316.593	109.804	933.762	628.08
233520_s_at	CMYA5	-3.25912	0.0477544	-2.16434	219.284	33.8544	474.605	259.066
213800_at	CFH	-3.27024	0.0477544	-1.85971	91.2759	15.5882	169.747	79.0574
209908_s_at	TGFB2	-3.27391	0.0477544	-2.21923	67.9412	19.4738	150.777	83.1364
226482_s_at	F11R	-3.27927	0.0477544	-4.43059	134.467	82.8272	595.77	464.023
206197_at	NME5	-3.28398	0.0477544	-1.9064	202.079	121.7	385.244	170.67
223591_at	RNF135	-3.28641	0.0477544	-2.35677	154.168	82.1371	363.34	205.528
215870_s_at	PLA2G5	-3.2928	0.0477544	-6.4256	111.249	53.676	714.844	607.147
203765_at	GCA	-3.3029	0.0477544	-1.83394	319.975	155.417	586.814	251.978
224707_at	C5orf32	-3.32478	0.0477544	-1.97287	667.522	219.319	1316.94	634.931
214175_x_at	PDLIM4	-3.32848	0.0477544	-3.18141	137.894	38.2416	438.698	298.893
219011_at	PLEKHA4	-3.33575	0.0477544	-2.41067	143.745	67.2749	346.523	197.719
228574_at	TMTC2	-3.37379	0.0477544	-2.13235	186.801	137.077	398.326	191.782
218983_at	C1RL	-3.37505	0.0477544	-3.13299	64.068	22.5383	200.724	133.639
209496_at	RARRES2	-3.37813	0.0477544	-3.45062	162.709	37.4659	561.447	390.862
200986_at	SERPING1	-3.38615	0.0477544	-3.5325	279.986	147.839	989.05	689.074
219073_s_at	OSBPL10	-3.38813	0.0477544	-3.18136	83.9309	54.2118	267.015	176.379
221636_s_at	MOSC2	-3.39348	0.0477544	-2.10912	210.524	85.3242	444.021	222.657
213353_at	ABCA5	-3.4067	0.0477544	-2.67295	63.9871	47.2853	171.035	100.462
223592_s_at	RNF135	-3.42654	0.0477544	-2.4489	211.055	125.078	516.853	286.76
228600_x_at	C7orf46	-3.4294	0.0477544	-2.13488	237.194	173.558	506.381	239.624
223786_at	CHST6	-3.43659	0.0477544	-2.33117	131.091	46.8831	305.594	166.154
209129_at	TRIP6	-3.44603	0.0477544	-2.38859	384.757	153.755	919.027	506.245
213373_s_at	CASP8	-3.46672	0.0477544	-2.05208	68.4858	23.58	140.538	67.532
209307_at	SWAP70	-3.46997	0.0477544	-3.11461	86.0302	51.8968	267.951	171.198
209395_at	CHI3L1	-3.47744	0.0477544	-7.61081	616.702	1221.79	4693.6	3821.8
211597_s_at	HOP	-3.47779	0.0477544	-2.95879	1311.28	1094.41	3879.81	2363.96
228400_at	SHROOM3	-3.50205	0.0477544	-2.0803	72.7211	15.0955	151.281	73.8725
208161_s_at	ABCC3	-3.50937	0.0477544	-2.00573	153.353	18.4967	307.586	145.357
209396_s_at	CHI3L1	-3.51929	0.0477544	-8.38321	584.844	1128	4902.87	4015.27
219616_at	FLJ21963	-3.52344	0.0477544	-2.45635	126.539	25.7233	310.823	172.811
227055_at	METTL7B	-3.5399	0.0477544	-5.35907	415.317	490.923	2225.71	1671.61
206178_at	PLA2G5	-3.55376	0.0477544	-2.65956	174.684	33.5226	464.584	269.84
216942_s_at	CD58	-3.56575	0.0477544	-2.75347	54.8527	24.0097	151.035	88.3483
218450_at	HEBP1	-3.56605	0.0477544	-1.9047	416.217	237.242	792.768	321.406
203732_at	TRIP4	-3.5694	0.0477544	-1.85287	173.939	105.5	322.286	123.184
205481_at	ADORA1	-3.57591	0.0477544	-2.03481	416.79	182.909	848.088	385.383
205173_x_at	CD58	-3.58508	0.0477544	-3.09422	123.766	70.1836	382.961	236.229
203409_at	DDB2	-3.61715	0.0477544	-2.01346	170.793	55.746	343.884	155.309
212268_at	SERPINB1	-3.63791	0.0477544	-1.99427	107.108	35.7167	213.601	94.8032
218424_s_at	STEAP3	-3.64226	0.0477544	-2.42144	257.396	61.3914	623.269	331.211
204518_s_at	PPIC	-3.65362	0.0477544	-1.80666	126.858	58.4611	229.19	86.3382
218194_at	REXO2	-3.66007	0.0477544	-1.81919	635.451	192.475	1156	458.008
218691_s_at	PDLIM4	-3.66014	0.0477544	-1.86394	25.7457	2.93705	47.9883	20.0814
219569_s_at	TMEM22	-3.73516	0.0477544	-2.28217	312.303	154.94	712.729	343.756
217730_at	TMBIM1	-3.74416	0.0477544	-1.97971	443.058	135.065	877.125	376.259
212169_at	FKBP9	-3.74665	0.0477544	-2.03798	526.015	264.515	1072.01	457.767
203501_at	PGCP	-3.75691	0.0477544	-2.49539	106.401	45.9476	265.512	137.857
225401_at	C1orf85	-3.78542	0.0477544	-1.97907	167.557	47.6295	331.606	140.994
226304_at	HSPB6	-3.79082	0.0477544	-2.18287	189.449	38.0619	413.541	194.786
229222_at	FLJ21963	-3.79603	0.0477544	-5.27503	96.9204	67.5941	511.258	359.835
200916_at	TAGLN2	-3.81604	0.0477544	-2.57895	538.652	294.682	1389.16	718.722
224566_at	TncRNA	-3.81685	0.0477544	-2.93864	796.639	442.212	2341.04	1316.71
219354_at	KLHL26	-3.88161	0.0477544	-2.07371	173.269	93.7955	359.311	149.147
223380_s_at	LATS2	-3.88306	0.0477544	-2.44649	136.799	55.8564	334.677	165.81
208934_s_at	LGALS8	-3.89233	0.0477544	-2.20104	98.8291	59.3977	217.526	94.9564
225867_at	VASN	-3.90619	0.0477544	-1.97843	136.482	36.1804	270.021	111.382
226809_at	FLJ30428	-3.95123	0.0477544	-3.50003	135.67	106.045	474.851	277.833
219332_at	MICALL2	-3.96484	0.0477544	-2.32604	149.333	66.2373	347.354	161.03
200600_at	MSN	-4.02264	0.0477544	-3.2571	777.597	524.725	2532.71	1413.99
208935_s_at	LGALS8	-4.03592	0.0477544	-2.34276	70.3081	28.4087	164.715	75.772
224565_at	TncRNA	-4.05125	0.0477544	-2.64042	829.604	490.991	2190.51	1076.29
210137_s_at	DCTD	-4.06714	0.0477544	-2.06463	420.009	205.472	867.162	344.165
202864_s_at	SP100	-4.08175	0.0477544	-2.21491	135.496	29.1692	300.112	132.66
224710_at	RAB34	-4.10064	0.0477544	-3.89902	206.382	135.093	804.685	477.386
213556_at	LOC390940	-4.12264	0.0477544	-2.29585	98.9943	17.3449	227.276	102.699
231118_at	ANKRD35	-4.1266	0.0477544	-1.91535	214.127	135.938	410.129	135.881
202003_s_at	ACAA2	-4.13685	0.0477544	-1.8427	391.831	152.956	722.027	249.075
209708_at	MOXD1	-4.15405	0.0477544	-4.0817	154.464	47.087	630.478	379.049
204239_s_at	NNAT	-4.1828	0.0477544	-1.81144	412.286	141.862	746.832	251.891
205970_at	MT3	-4.19187	0.0477544	-2.09114	2227.12	1194.76	4657.21	1790.55
201215_at	PLS3	-4.20698	0.0477544	-2.33107	937.334	425.23	2184.99	951.483
204041_at	MAOB	-4.21293	0.0477544	-2.97969	1300.7	679.483	3875.67	1987.62
209301_at	CA2	-4.21347	0.0477544	-2.52598	974.234	718.718	2460.9	1091.73
222150_s_at	LOC54103	-4.21581	0.0477544	-3.62526	133.773	88.1373	484.962	271.408
1555630_a_at	RAB34	-4.22803	0.0477544	-4.61852	260.243	202.848	1201.94	729.065
224822_at	DLC1	-4.25359	0.0477544	-2.68172	337.967	146.78	906.333	434.733
223120_at	FUCA2	-4.25653	0.0477544	-1.9905	273.45	83.2412	544.304	205.324
213142_x_at	LOC54103	-4.26898	0.0477544	-3.37102	164.672	92.0631	555.115	298.498
210762_s_at	DLC1	-4.27039	0.0477544	-2.36883	468.374	239.134	1109.5	477.786
227188_at	C21orf63	-4.29719	0.0477544	-2.78633	87.0359	46.2098	242.51	116.899
208789_at	PTRF	-4.35165	0.0477544	-2.01697	478.501	260.699	965.12	337.917
206306_at	RYR3	-4.3978	0.0477544	-4.65685	137.112	118.567	638.508	371.686
223206_s_at	NMRAL1	-4.4366	0.0477544	-2.11677	215.596	118.004	456.367	166.163
201896_s_at	PSRC1	-4.43939	0.0477544	-2.95271	650.983	419.588	1922.16	917.271
228726_at	---	-4.50763	0.0477544	-1.86831	93.727	22.4334	175.111	58.4182
1554474_a_at	MOXD1	-4.50829	0.0477544	-4.38274	79.5389	28.3107	348.598	197.242
213572_s_at	SERPINB1	-4.50969	0.0477544	-2.4767	65.4405	32.2291	162.076	68.5122
210751_s_at	RGN	-4.5762	0.0477544	-2.23071	253.497	96.2212	565.478	218.959
53720_at	FLJ11286	-4.59469	0.0477544	-1.97039	266.502	93.4643	525.113	178.452
236488_s_at	---	-4.61802	0.0477544	-2.18431	128.307	88.2962	280.263	96.0739
213455_at	FAM114A1	-4.68176	0.0477544	-1.83059	278.981	58.7898	510.701	160.494
202598_at	S100A13	-4.75716	0.0477544	-2.04617	786.014	436.909	1608.32	512.885
208454_s_at	PGCP	-4.76508	0.0477544	-1.8346	176.637	40.5648	324.059	99.8153
206580_s_at	EFEMP2	-4.81493	0.0477544	-2.00719	366.062	103.651	734.758	246.587
209306_s_at	SWAP70	-4.8328	0.0477544	-3.02803	134.836	77.956	408.287	182.012
201572_x_at	DCTD	-4.86696	0.0477544	-2.07553	398.216	194.849	826.507	268.576
210840_s_at	IQGAP1	-4.88643	0.0477544	-1.8856	359.102	104.513	677.121	206.973
209276_s_at	GLRX	-4.98621	0.0477544	-1.85622	251.968	107.212	467.707	129.001
208933_s_at	---	-5.0471	0.0477544	-2.74589	148.183	102.712	406.895	158.985
220233_at	FBXO17	-5.28342	0.0477544	-1.90043	131.014	30.2687	248.982	71.8959
208936_x_at	LGALS8	-5.3874	0.0477544	-1.82669	292.383	103.712	534.095	135.813
227013_at	LATS2	-5.54338	0.0477544	-3.32252	142.446	72.6757	473.28	193.298
200791_s_at	IQGAP1	-5.65549	0.0477544	-2.10322	586.438	229.997	1233.41	354.639
213340_s_at	KIAA0495	-5.78935	0.0477544	-2.51399	219.413	129.105	551.604	174.605
228234_at	TICAM2	-5.84056	0.0477544	-1.81428	185.165	52.4709	335.943	79.9028
212355_at	KIAA0323	-6.01243	0.0477544	-1.85224	174.305	53.3309	322.856	75.7445
209213_at	CBR1	-6.37391	0.0477544	-3.10577	319.629	220.324	992.695	325.533
218341_at	PPCS	-6.4279	0.0477544	-2.1758	174.951	77.2525	380.657	95.9897
