# Supplementary material for: The Proneural Molecular Signature Is Enriched in Oligodendrogliomas and Predicts Improved Survival among Diffuse Gliomas
Source: PLoS One. 2010 Sep 3;5(9):e12548. doi: 10.1371/journal.pone.0012548 (PMC2933229; doi:10.1371/journal.pone.0012548)
Supplement: Table S8 — Integrated RNA and DNA Copy number analysis comparison of low- and high-grade proneural gliomas. (0.19 MB XLS) [file pone.0012548.s008.xls]

## Sheet: REMBRANDT_data.sig-proneural.co
Probe ID	Symbol	Score	FDR(BH)	Fold Change	PN-oligo-astro Mean	PN-oligo-astro Std	PN-GBM Mean	PN-GBM Std	OA-Del	q value	OA-Amp	q value	GBM-Amp	q value		Gene Title	Entrez Gene ID for Human	RefSeq Transcript ID	Pathway	go biological process term	go molecular function term	go cellular component term
208659_at	CLIC1	-6.86923	0.0243566	2.42339	520.913	275.383	1262.38	511.71					6p21.31	0.043032	12	chloride intracellular channel 1	1192	NM_001288	---	transport /// transport /// ion transport /// chloride transport /// chloride transport /// defense response /// response to unfolded protein /// signal transduction /// response to nutrient	ion channel activity /// voltage-gated ion channel activity /// voltage-gated chloride channel activity /// chloride channel activity /// chloride channel activity /// chloride channel activity /// protein binding /// protein binding /// chloride ion binding /// NF-kappaB binding	membrane fraction /// soluble fraction /// nucleus /// nucleus /// nuclear envelope /// nuclear envelope /// cytoplasm /// cytoplasm /// cytosol /// plasma membrane /// brush border /// membrane /// integral to membrane /// chloride channel complex /// protein complex
212998_x_at	HLA-DQB1	-4.10221	0.0243566	2.01001	201.004	207.57	404.02	200.852					6p21.31	0.043032	26	major histocompatibility complex, class II, DQ beta 1	3119	NM_002123 /// XM_002344046 /// XM_002344047	---	antigen processing and presentation of peptide or polysaccharide antigen via MHC class II /// immune response /// immune response /// antigen processing and presentation /// antigen processing and presentation of exogenous peptide antigen via MHC class II /// antigen processing and presentation of peptide antigen	protein binding /// MHC class II receptor activity /// peptide antigen binding	intracellular /// early endosome /// multivesicular body /// Golgi apparatus /// plasma membrane /// plasma membrane /// external side of plasma membrane /// membrane /// membrane /// integral to membrane /// MHC class II protein complex /// MHC class II protein complex
208747_s_at	C1S	-4.02731	0.0243566	1.91675	639.854	491.088	1226.44	648.806					12p13.32	0.0012072	9	complement component 1, s subcomponent	716	NM_001734 /// NM_201442	<a target="external" href="http://www.wikipathways.org/index.php/Pathway:Homo_sapiens:Complement_Activation_Classical">Complement_Activation_Classical</a>	proteolysis /// immune response /// complement activation, classical pathway /// glial cell differentiation /// innate immune response /// response to cAMP	catalytic activity /// serine-type endopeptidase activity /// serine-type endopeptidase activity /// calcium ion binding /// peptidase activity /// serine-type peptidase activity /// hydrolase activity /// metal ion binding	extracellular region /// extracellular region
212067_s_at	C1R	-3.8826	0.0243566	2.3943	342.985	308.674	821.207	585.522					12p13.32	0.0012072	7	complement component 1, r subcomponent	715	NM_001733	<a target="external" href="http://www.wikipathways.org/index.php/Pathway:Homo_sapiens:Complement_Activation_Classical">Complement_Activation_Classical</a>	proteolysis /// immune response /// immune response /// complement activation, classical pathway /// innate immune response	catalytic activity /// serine-type endopeptidase activity /// serine-type endopeptidase activity /// calcium ion binding /// peptidase activity /// serine-type peptidase activity /// serine-type peptidase activity /// hydrolase activity	extracellular region /// extracellular region
218983_at	C1RL	-3.79842	0.0243566	2.27568	76.8007	57.5202	174.774	124.52					12p13.32	0.0012072	8	complement component 1, r subcomponent-like	51279	NM_016546	---	proteolysis /// immune response /// complement activation, classical pathway /// innate immune response	catalytic activity /// serine-type endopeptidase activity /// peptidase activity /// serine-type peptidase activity /// hydrolase activity	extracellular region /// extracellular space
209312_x_at	HLA-DRB1	-3.79584	0.0243566	1.87381	2042.86	1834.08	3827.93	1981.89					6p21.31	0.043032	28	major histocompatibility complex, class II, DR beta 1	3123	NM_002124 /// NM_002125 /// NM_021983 /// XM_002346251	---	antigen processing and presentation of peptide or polysaccharide antigen via MHC class II /// immune response /// signal transduction /// pathogenesis /// antigen processing and presentation	MHC class II receptor activity	plasma membrane /// integral to plasma membrane /// membrane /// integral to membrane /// MHC class II protein complex
215193_x_at	HLA-DRB1	-3.75995	0.0243566	1.843	1783.26	1554.26	3286.56	1687.51					6p21.31	0.043032	28	major histocompatibility complex, class II, DR beta 1	3123	NM_002124 /// NM_021983 /// NM_022555 /// XM_002346251 /// XM_002346768 /// XM_002346769	---	antigen processing and presentation of peptide or polysaccharide antigen via MHC class II /// immune response /// immune response /// signal transduction /// pathogenesis /// antigen processing and presentation	MHC class II receptor activity /// MHC class II receptor activity	plasma membrane /// integral to plasma membrane /// integral to plasma membrane /// membrane /// membrane /// integral to membrane /// MHC class II protein complex
210982_s_at	HLA-DRA	-3.54924	0.0243566	1.81001	1288.06	1272.31	2331.41	1170.44					6p21.31	0.043032	27	major histocompatibility complex, class II, DR alpha	3122	NM_019111	---	antigen processing and presentation of peptide or polysaccharide antigen via MHC class II /// defense response /// immune response /// immune response /// immunoglobulin mediated immune response /// antigen processing and presentation /// antigen processing and presentation of exogenous peptide antigen via MHC class II /// positive regulation of immune response	MHC class II receptor activity	lysosome /// plasma membrane /// plasma membrane /// integral to plasma membrane /// external side of plasma membrane /// membrane /// integral to membrane /// MHC class II protein complex
209823_x_at	HLA-DQB1	-3.54826	0.0243566	1.83556	223.414	169.276	410.09	237.579					6p21.31	0.043032	26	major histocompatibility complex, class II, DQ beta 1	3119	NM_002123	---	antigen processing and presentation of peptide or polysaccharide antigen via MHC class II /// immune response /// immune response /// antigen processing and presentation /// antigen processing and presentation of exogenous peptide antigen via MHC class II /// antigen processing and presentation of peptide antigen	protein binding /// MHC class II receptor activity /// peptide antigen binding	intracellular /// early endosome /// multivesicular body /// Golgi apparatus /// plasma membrane /// plasma membrane /// external side of plasma membrane /// membrane /// membrane /// integral to membrane /// MHC class II protein complex /// MHC class II protein complex
229435_at	GLIS3	-3.29204	0.0243566	2.20445	245.077	205.484	540.258	431.469					9p23	0.013446	20	GLIS family zinc finger 3	169792	NM_001042413 /// NM_152629	---	negative regulation of transcription from RNA polymerase II promoter /// negative regulation of transcription from RNA polymerase II promoter /// transcription /// regulation of transcription /// positive regulation of transcription from RNA polymerase II promoter /// positive regulation of transcription from RNA polymerase II promoter	nucleic acid binding /// DNA binding /// transcription factor activity /// specific RNA polymerase II transcription factor activity /// specific RNA polymerase II transcription factor activity /// zinc ion binding /// metal ion binding	intracellular /// nucleus /// nucleus /// nuclear part
1555229_a_at	C1S	-3.02178	0.0243566	1.84759	117.503	137.048	217.098	134.425					12p13.32	0.0012072	9	complement component 1, s subcomponent	716	NM_001734 /// NM_201442	<a target="external" href="http://www.wikipathways.org/index.php/Pathway:Homo_sapiens:Complement_Activation_Classical">Complement_Activation_Classical</a>	proteolysis /// immune response /// complement activation, classical pathway /// glial cell differentiation /// innate immune response /// response to cAMP	catalytic activity /// serine-type endopeptidase activity /// serine-type endopeptidase activity /// calcium ion binding /// peptidase activity /// serine-type peptidase activity /// hydrolase activity /// metal ion binding	extracellular region /// extracellular region
203305_at	F13A1	-2.99947	0.0243566	2.21294	171.904	81.5658	380.414	349.341					6p21.31	0.043032	16	coagulation factor XIII, A1 polypeptide	2162	NM_000129	---	blood coagulation /// blood coagulation /// peptide cross-linking	protein-glutamine gamma-glutamyltransferase activity /// protein-glutamine gamma-glutamyltransferase activity /// calcium ion binding /// acyltransferase activity /// transferase activity /// metal ion binding	extracellular region /// extracellular region /// extracellular region /// cytoplasm
218484_at	NDUFA4L2	-2.94255	0.0370332	1.93076	205.511	95.0134	396.793	324.004			12q14.1	0.032586	12q13.3	0.00086782	37	NADH dehydrogenase (ubiquinone) 1 alpha subcomplex, 4-like 2	56901	NM_020142	---	---	---	---
212671_s_at	HLA-DQA1	-2.79498	0.0243566	2.12507	296.046	341.285	629.118	553.295					6p21.31	0.043032	25	major histocompatibility complex, class II, DQ alpha 1	3117	NM_002122 /// NM_020056 /// XM_002343984 /// XM_002344045	---	antigen processing and presentation of peptide or polysaccharide antigen via MHC class II /// immune response /// immune response /// antigen processing and presentation	MHC class II receptor activity /// MHC class II receptor activity	plasma membrane /// integral to plasma membrane /// membrane /// integral to membrane /// MHC class II protein complex
209122_at	PLIN2	-2.7803	0.0243566	2.76604	230.716	194.813	638.168	733.376					9p23	0.013446	39	perilipin 2	123	NM_001122	---	response to organic cyclic substance /// long-chain fatty acid transport /// lipid storage /// response to drug	protein binding	extracellular region /// nucleus /// cytoplasm /// endoplasmic reticulum /// lipid particle /// lipid particle /// plasma membrane /// membrane /// extrinsic to membrane
204146_at	RAD51AP1	-2.61452	0.0370332	1.81335	99.1245	94.8141	179.747	140.904			12p13.33	0.0071755	12p13.32	0.0012072	40	RAD51 associated protein 1	10635	NM_001130862 /// NM_006479	---	double-strand break repair via homologous recombination /// DNA repair /// DNA repair /// DNA repair /// response to DNA damage stimulus	DNA binding /// double-stranded DNA binding /// double-stranded DNA binding /// single-stranded DNA binding /// single-stranded DNA binding /// RNA binding /// RNA binding /// RNA binding /// protein binding	nucleus /// nucleus /// nucleus
208579_x_at	HIST1H2BK	-2.4769	0.0243566	2.01847	200.505	96.4959	404.714	414.347					6p21.31	0.043032	24	histone cluster 1, H2bk	85236	NM_080593	---	nucleosome assembly /// nucleosome assembly /// defense response to bacterium	DNA binding /// DNA binding /// protein binding	nucleosome /// nucleosome /// nucleus /// chromosome
209398_at	HIST1H1C	-2.06949	0.0243566	2.19198	102.255	62.1501	224.141	296.811					6p21.31	0.043032	23	histone cluster 1, H1c	3006	NM_005319	---	nucleosome assembly /// nucleosome assembly /// nucleosome positioning	DNA binding /// DNA binding /// protein binding	nucleosome /// nucleosome /// nucleus /// chromosome
238999_at	---	-2.062	0.0479895	2.53272	195.476	198.181	495.087	726.394			12q14.1	0.032586	12q13.3	0.00086782	0	---	---	---	---	---	---	---
218638_s_at	SPON2	-1.78651	0.0243566	1.96947	249.003	82.7091	490.403	686.303			4p16.3	1.17e-05	4p16.3	0.010987	50	spondin 2, extracellular matrix protein	10417	NM_001128325 /// NM_012445	---	immune response /// cell adhesion /// axon guidance	receptor binding /// calcium ion binding /// protein binding /// metal ion binding	extracellular region /// proteinaceous extracellular matrix
218602_s_at	HAUS6	-1.70822	0.0243566	2.46221	51.3549	19.126	126.447	223.705					9p23	0.013446	21	HAUS augmin-like complex, subunit 6	54801	NM_017645	---	cell cycle /// mitosis /// spindle assembly /// centrosome organization /// cell division	---	cytoplasm /// centrosome /// spindle /// cytoskeleton /// microtubule /// HAUS complex
205539_at	AVIL	-1.70332	0.0243566	2.84929	109.078	92.5673	310.793	599.996			12q14.1	0.032586	12q13.3	0.00086782	5	advillin	10677	NM_006576	---	response to stress /// cytoskeleton organization /// nervous system development /// actin filament capping	actin binding /// calcium ion binding /// protein binding	cytoplasm /// cytoskeleton /// actin cytoskeleton
239293_at	NRSN1	4.41631	0.0243566	-1.96457	614.955	377.37	313.022	210.688					6p21.31	0.043032	38	neurensin 1	140767	NM_080723	---	nervous system development /// nervous system development	---	membrane /// integral to membrane /// integral to membrane /// cytoplasmic membrane-bounded vesicle /// cytoplasmic membrane-bounded vesicle /// transport vesicle /// growth cone /// growth cone /// neuron projection /// neuron projection /// cell soma /// cell soma
203146_s_at	GABBR1	5.49314	0.0243566	-1.96407	4350.42	1965.42	2215	1355.27					6p21.31	0.043032	18	gamma-aminobutyric acid (GABA) B receptor, 1	2550	NM_001470 /// NM_021903 /// NM_021904 /// NM_021905	<a target="external" href="http://www.wikipathways.org/index.php/Pathway:Homo_sapiens:GPCRDB_Class_C_Metabotropic_glutamate_pheromone">GPCRDB_Class_C_Metabotropic_glutamate_pheromone</a>	osteoblast differentiation /// signal transduction /// G-protein coupled receptor protein signaling pathway /// negative regulation of adenylate cyclase activity /// negative regulation of adenylate cyclase activity /// gamma-aminobutyric acid signaling pathway	signal transducer activity /// receptor activity /// G-protein coupled receptor activity /// GABA-B receptor activity /// GABA-B receptor activity /// protein binding /// protein binding	extracellular region /// cytoplasm /// plasma membrane /// integral to plasma membrane /// membrane /// integral to membrane /// cell junction /// synapse /// postsynaptic membrane
203608_at	ALDH5A1	8.01958	0.0243566	-1.96807	1837.94	585.625	933.877	380.329					6p21.31	0.043032	3	aldehyde dehydrogenase 5 family, member A1	7915	NM_001080 /// NM_170740	---	glucose metabolic process /// glucose metabolic process /// acetate metabolic process /// acetate metabolic process /// succinate metabolic process /// succinate metabolic process /// glutamate metabolic process /// glutamate metabolic process /// glutamine metabolic process /// glutamine metabolic process /// glycerophospholipid metabolic process /// glycerophospholipid metabolic process /// glu…	succinate-semialdehyde dehydrogenase activity /// succinate-semialdehyde dehydrogenase activity /// succinate-semialdehyde dehydrogenase activity /// oxidoreductase activity /// oxidoreductase activity, acting on the aldehyde or oxo group of donors, NAD or NADP as acceptor /// carboxylic acid binding /// protein homodimerization activity /// NAD or NADH binding	soluble fraction /// soluble fraction /// mitochondrion /// mitochondrion
202315_s_at	BCR	5.46768	0.0243566	-1.8628	1011.54	458	543.023	278			22q11.1	0.00046943			6	breakpoint cluster region	613	NM_004327 /// NM_021574	---	protein amino acid phosphorylation /// protein amino acid phosphorylation /// signal transduction /// signal transduction /// intracellular signaling cascade /// intracellular signaling cascade /// peptidyl-tyrosine phosphorylation /// regulation of Rho protein signal transduction	nucleotide binding /// magnesium ion binding /// protein serine/threonine kinase activity /// protein serine/threonine kinase activity /// protein serine/threonine kinase activity /// non-membrane spanning protein tyrosine kinase activity /// guanyl-nucleotide exchange factor activity /// Rho guanyl-nucleotide exchange factor activity /// GTPase activator activity /// GTPase activator activity //…	intracellular
213609_s_at	SEZ6L	5.21401	0.0243566	-2.14287	1103.41	677.583	514.923	287.265			22q11.1	0.00046943			43	seizure related 6 homolog (mouse)-like	23544	NM_021115	---	---	---	endoplasmic reticulum /// membrane /// integral to membrane
205330_at	MN1	5.16892	0.0243566	-2.30059	522.987	327.345	227.328	164.389			22q11.1	0.00046943			35	meningioma (disrupted in balanced translocation) 1	4330	NM_002430	---	---	---	---
206850_at	RASL10A	4.86497	0.0243566	-2.64794	1337.07	938.004	504.948	532.987			22q11.1	0.00046943			41	RAS-like, family 10, member A	10633	NM_001007279 /// NM_006477	---	signal transduction /// small GTPase mediated signal transduction /// small GTPase mediated signal transduction	nucleotide binding /// GTPase activity /// GTPase activity /// GTP binding	intracellular /// plasma membrane /// membrane
231650_s_at	SEZ6L	4.76444	0.0243566	-2.35389	1029.5	792.875	437.362	247.147			22q11.1	0.00046943			43	seizure related 6 homolog (mouse)-like	23544	NM_021115	---	---	---	endoplasmic reticulum /// membrane /// integral to membrane
225864_at	FAM84B (includes EG:157638)	4.58286	0.0243566	-2.0582	1774.07	1131.15	861.951	580.398			8q24.22	0.00082296			17	family with sequence similarity 84, member B	157638	NM_174911	---	---	protein binding	cytoplasm /// plasma membrane
227845_s_at	SHD	4.27403	0.0370332	-1.92123	1240.16	782.645	645.501	414.146			19p13.3	0.0030983			45	Src homology 2 domain containing transforming protein D	56961	NM_020209	---	---	protein binding	---
1554593_s_at	SLC1A6	4.19153	0.0243566	-2.27373	171.863	112.583	75.5863	82.7755			19p13.3	0.0030983			47	solute carrier family 1 (high affinity aspartate/glutamate transporter), member 6	6511	NM_005071	---	transport /// dicarboxylic acid transport /// synaptic transmission /// aspartate transport /// L-glutamate transport /// L-glutamate transport /// regulation of membrane potential	L-glutamate transmembrane transporter activity /// anion transmembrane transporter activity /// L-aspartate transmembrane transporter activity /// symporter activity /// sodium:dicarboxylate symporter activity	membrane fraction /// integral to plasma membrane /// membrane /// integral to membrane
223605_at	SLC25A18 (includes EG:83733)	3.96211	0.0243566	-1.86317	1310.21	731.691	703.216	565.89			22q11.1	0.00046943			48	solute carrier family 25 (mitochondrial carrier), member 18	83733	NM_031481	---	transport /// transmembrane transport	binding /// symporter activity	mitochondrion /// mitochondrial inner membrane /// membrane /// integral to membrane
212793_at	DAAM2	3.90765	0.0243566	-1.95346	2884	1806.93	1476.35	1267.01			6p21.2	0.0087752			13	dishevelled associated activator of morphogenesis 2	23500	NM_015345	---	Mo-molybdopterin cofactor biosynthetic process /// Mo-molybdopterin cofactor biosynthetic process /// Mo-molybdopterin cofactor biosynthetic process /// metabolic process /// cellular component organization /// actin cytoskeleton organization /// molybdopterin cofactor biosynthetic process	nucleotide binding /// actin binding /// catalytic activity /// iron ion binding /// GTP binding /// Rho GTPase binding /// molybdenum ion binding /// metal ion binding /// iron-sulfur cluster binding /// 4 iron, 4 sulfur cluster binding	nucleus /// molybdopterin synthase complex
240709_at	SEZ6L	3.83669	0.0370332	-2.251	201.63	174.764	89.5737	75.0638			22q11.1	0.00046943			43	seizure related 6 homolog (mouse)-like	23544	NM_021115	---	---	---	endoplasmic reticulum /// membrane /// integral to membrane
204205_at	APOBEC3G	-1.66997	0.0370332	2.01459	65.6214	24.9581	132.2	202.457			22q11.1	0.00046943			4	apolipoprotein B mRNA editing enzyme, catalytic polypeptide-like 3G	60489	NM_021822	---	positive regulation of defense response to virus by host /// transcription, RNA-dependent /// response to virus /// base conversion or substitution editing /// interspecies interaction between organisms /// innate immune response /// negative regulation of retroviral genome replication /// negative regulation of viral reproduction	RNA binding /// catalytic activity /// cytidine deaminase activity /// protein binding /// zinc ion binding /// zinc ion binding /// hydrolase activity /// hydrolase activity, acting on carbon-nitrogen (but not peptide) bonds, in cyclic amidines /// protein homodimerization activity /// metal ion binding	nucleus /// nucleus /// nucleolus /// cytoplasm /// cytoplasm /// mitochondrion /// cytosol /// apolipoprotein B mRNA editing enzyme complex
227697_at	SOCS3	-2.64274	0.0243566	2.91256	117.843	150.035	343.223	420.607			17q24.2	0.0045328			49	suppressor of cytokine signaling 3	9021	NM_003955	---	response to hypoxia /// regulation of protein amino acid phosphorylation /// anti-apoptosis /// intracellular signaling cascade /// JAK-STAT cascade /// JAK-STAT cascade /// aging /// response to heat /// response to bacterium /// negative regulation of signal transduction /// response to gamma radiation /// response to organic cyclic substance /// modification-dependent protein catabolic process…	protein kinase inhibitor activity /// protein binding	cytoplasm
243296_at	NAMPT	-2.77106	0.0243566	3.10378	559.056	437.846	1735.19	2140.08			7q22.3	1.78e-06			36	nicotinamide phosphoribosyltransferase	10135	NM_005746	---	signal transduction /// cell-cell signaling /// positive regulation of cell proliferation /// NAD biosynthetic process /// pyridine nucleotide biosynthetic process	cytokine activity /// transferase activity /// transferase activity, transferring glycosyl groups /// nicotinamide phosphoribosyltransferase activity /// nicotinamide phosphoribosyltransferase activity	cytoplasm /// cytosol
204017_at	KDELR3	-2.84322	0.0243566	1.93195	74.1538	21.0769	143.262	122.963			22q11.1	0.00046943			31	KDEL (Lys-Asp-Glu-Leu) endoplasmic reticulum protein retention receptor 3	11015	NM_006855 /// NM_016657	---	RNA processing /// protein retention in ER lumen /// transport /// protein transport /// vesicle-mediated transport	nucleotide binding /// nucleic acid binding /// RNA binding /// RNA binding /// RNA helicase activity /// helicase activity /// receptor activity /// ATP binding /// ATP-dependent helicase activity /// RNA-dependent ATPase activity /// hydrolase activity /// ER retention sequence binding	nucleus /// nucleus /// endoplasmic reticulum /// membrane /// integral to membrane
221577_x_at	GDF15	-2.8929	0.0243566	2.07431	66.0567	54.3205	137.022	118.523			19p13.3	0.0030983			19	growth differentiation factor 15	9518	NM_004864 /// XM_002345162	---	signal transduction /// transforming growth factor beta receptor signaling pathway /// cell-cell signaling	cytokine activity /// cytokine activity /// growth factor activity	extracellular region /// extracellular region /// extracellular space
217738_at	NAMPT	-2.97962	0.0243566	2.29163	690.694	389.342	1582.81	1499.55			7q22.3	1.78e-06			36	nicotinamide phosphoribosyltransferase	10135	NM_005746	---	signal transduction /// cell-cell signaling /// positive regulation of cell proliferation /// NAD biosynthetic process /// pyridine nucleotide biosynthetic process	cytokine activity /// transferase activity /// transferase activity, transferring glycosyl groups /// nicotinamide phosphoribosyltransferase activity /// nicotinamide phosphoribosyltransferase activity	cytoplasm /// cytosol
1555167_s_at	NAMPT	-3.19231	0.0243566	2.62772	154.636	97.9874	406.34	395.521			7q22.3	1.78e-06			36	nicotinamide phosphoribosyltransferase	10135	NM_005746	---	signal transduction /// cell-cell signaling /// positive regulation of cell proliferation /// NAD biosynthetic process /// pyridine nucleotide biosynthetic process	cytokine activity /// transferase activity /// transferase activity, transferring glycosyl groups /// nicotinamide phosphoribosyltransferase activity /// nicotinamide phosphoribosyltransferase activity	cytoplasm /// cytosol
242517_at	KISS1R	-3.241	0.0243566	2.95319	56.5372	35.9643	166.965	171.706			19p13.3	0.0030983			32	KISS1 receptor	84634	NM_032551	---	activation of MAPKK activity /// signal transduction /// G-protein coupled receptor protein signaling pathway /// G-protein coupled receptor protein signaling pathway /// behavior /// negative regulation of cell proliferation /// calcium-mediated signaling /// negative regulation of cell migration /// positive regulation of hormone secretion /// arachidonic acid secretion /// positive regulation …	nucleic acid binding /// signal transducer activity /// receptor activity /// G-protein coupled receptor activity /// protein binding /// protein binding /// neuropeptide receptor activity /// peptide receptor activity, G-protein coupled /// neuropeptide binding	nucleus /// plasma membrane /// cell surface /// membrane /// integral to membrane /// integral to membrane
203665_at	HMOX1	-3.39259	0.0243566	2.46295	376.921	504.596	928.337	740.907			22q11.1	0.00046943			29	heme oxygenase (decycling) 1	3162	NM_002133	---	angiogenesis /// angiogenesis /// response to hypoxia /// endothelial cell proliferation /// healing during inflammatory response /// negative regulation of leukocyte migration /// heme oxidation /// heme oxidation /// anti-apoptosis /// response to oxidative stress /// response to oxidative stress /// protein kinase cascade /// small GTPase mediated signal transduction /// excretion /// regulati…	heme oxygenase (decyclizing) activity /// heme oxygenase (decyclizing) activity /// heme oxygenase (decyclizing) activity /// phospholipase D activity /// signal transducer activity /// iron ion binding /// oxidoreductase activity /// enzyme binding /// enzyme binding /// heme binding /// heme binding /// metal ion binding	extracellular space /// membrane fraction /// nucleus /// nucleus /// nucleolus /// endoplasmic reticulum /// endoplasmic reticulum /// endoplasmic reticulum /// microsome /// microsome /// cytosol /// caveola
217739_s_at	NAMPT	-3.4181	0.0243566	2.73701	494.705	371.919	1354.01	1252.32			7q22.3	1.78e-06			36	nicotinamide phosphoribosyltransferase	10135	NM_005746	---	signal transduction /// cell-cell signaling /// positive regulation of cell proliferation /// NAD biosynthetic process /// pyridine nucleotide biosynthetic process	cytokine activity /// transferase activity /// transferase activity, transferring glycosyl groups /// nicotinamide phosphoribosyltransferase activity /// nicotinamide phosphoribosyltransferase activity	cytoplasm /// cytosol
213353_at	ABCA5	-3.45622	0.0243566	2.00721	79.82	68.0423	160.215	107.518			17q24.2	0.0045328			1	ATP-binding cassette, sub-family A (ABC1), member 5	23461	NM_018672 /// NM_172232	---	transport	nucleotide binding /// ATP binding /// ATPase activity /// nucleoside-triphosphatase activity	lysosome /// endosome /// Golgi apparatus /// membrane /// integral to membrane
202855_s_at	SLC16A3	-3.5286	0.0243566	2.61553	79.9933	44.6173	209.225	183.837			17q24.2	0.0045328			46	solute carrier family 16, member 3 (monocarboxylic acid transporter 4)	9123	NM_001042422 /// NM_001042423 /// NM_004207	---	transport /// organic anion transport /// monocarboxylic acid transport /// transmembrane transport	monocarboxylic acid transmembrane transporter activity /// symporter activity /// secondary active monocarboxylate transmembrane transporter activity	membrane fraction /// plasma membrane /// integral to plasma membrane /// membrane /// integral to membrane
211651_s_at	LAMB1	-3.5604	0.0243566	2.98293	84.9411	66.4748	253.373	236.207			7q22.3	1.78e-06			33	laminin, beta 1	3912	NM_002291	<a target="external" href="http://www.wikipathways.org/index.php/Pathway:Homo_sapiens:Inflammatory_Response_Pathway">Inflammatory_Response_Pathway</a>	cell adhesion /// cell adhesion /// embryo implantation /// positive regulation of cell migration /// neuron projection development /// substrate adhesion-dependent cell spreading /// odontogenesis /// positive regulation of epithelial cell proliferation	structural molecule activity /// extracellular matrix structural constituent /// protein binding /// protein binding /// enzyme binding	extracellular region /// proteinaceous extracellular matrix /// basement membrane /// basement membrane /// basement membrane /// basal lamina /// laminin-1 complex /// laminin-1 complex /// laminin-2 complex /// laminin-2 complex /// laminin-8 complex /// laminin-8 complex /// laminin-10 complex /// laminin-10 complex /// perinuclear region of cytoplasm
201505_at	LAMB1	-3.81903	0.0243566	3.5185	76.0642	84.8828	267.632	248.027			7q22.3	1.78e-06			33	laminin, beta 1	3912	NM_002291	<a target="external" href="http://www.wikipathways.org/index.php/Pathway:Homo_sapiens:Inflammatory_Response_Pathway">Inflammatory_Response_Pathway</a>	cell adhesion /// cell adhesion /// embryo implantation /// positive regulation of cell migration /// neuron projection development /// substrate adhesion-dependent cell spreading /// odontogenesis /// positive regulation of epithelial cell proliferation	structural molecule activity /// extracellular matrix structural constituent /// protein binding /// protein binding /// enzyme binding	extracellular region /// proteinaceous extracellular matrix /// basement membrane /// basement membrane /// basement membrane /// basal lamina /// laminin-1 complex /// laminin-1 complex /// laminin-2 complex /// laminin-2 complex /// laminin-8 complex /// laminin-8 complex /// laminin-10 complex /// laminin-10 complex /// perinuclear region of cytoplasm
202856_s_at	SLC16A3	-4.40948	0.0243566	2.84607	105.615	67.2366	300.587	219.964			17q24.2	0.0045328			46	solute carrier family 16, member 3 (monocarboxylic acid transporter 4)	9123	NM_001042422 /// NM_001042423 /// NM_004207	---	transport /// organic anion transport /// monocarboxylic acid transport /// transmembrane transport	monocarboxylic acid transmembrane transporter activity /// symporter activity /// secondary active monocarboxylate transmembrane transporter activity	membrane fraction /// plasma membrane /// integral to plasma membrane /// membrane /// integral to membrane
218802_at	CCDC109B	-5.21561	0.0243566	2.39292	142.398	174.385	340.747	145.365	4q21.23	0.0085848					10	coiled-coil domain containing 109B	55013	NM_017918	---	---	---	membrane /// integral to membrane
203729_at	EMP3	-5.10132	0.0243566	3.1317	295.551	369.287	925.579	568.074	19q13.31	1.19e-06					14	epithelial membrane protein 3	2014	NM_001425	---	negative regulation of cell proliferation /// cell growth	---	membrane /// integral to membrane
209875_s_at	SPP1	-4.97003	0.0243566	1.83454	4894.39	3138.72	8978.98	3496.41	4q21.23	0.0085848					51	secreted phosphoprotein 1	6696	NM_000582 /// NM_001040058 /// NM_001040060	<a target="external" href="http://www.wikipathways.org/index.php/Pathway:Homo_sapiens:TGF_Beta_Signaling_Pathway">TGF_Beta_Signaling_Pathway</a>	ossification /// osteoblast differentiation /// inflammatory response /// cell adhesion /// embryo implantation /// response to organic substance /// positive regulation of cell-substrate adhesion /// biomineral formation /// response to vitamin D /// positive regulation of bone resorption /// decidualization /// response to steroid hormone stimulus /// negative regulation of collateral sprouting…	cytokine activity /// protein binding /// extracellular matrix binding	extracellular region /// extracellular space /// cytoplasm /// membrane-bounded vesicle /// cell projection /// apical part of cell /// perinuclear region of cytoplasm
202375_at	SEC24D	-4.88448	0.0243566	2.33014	61.4448	27.3944	143.175	82.9034	4q21.23	0.0085848					42	SEC24 family, member D (S. cerevisiae)	9871	NM_014822	---	transport /// intracellular protein transport /// ER to Golgi vesicle-mediated transport /// ER to Golgi vesicle-mediated transport /// ER to Golgi vesicle-mediated transport /// protein transport /// membrane organization /// vesicle-mediated transport	protein binding /// zinc ion binding	Golgi membrane /// cytoplasm /// endoplasmic reticulum /// endoplasmic reticulum membrane /// Golgi apparatus /// membrane /// COPII vesicle coat /// COPII vesicle coat /// perinuclear region of cytoplasm
203854_at	CFI	-4.31416	0.0243566	2.09896	223.671	166.865	469.475	263.29	4q21.23	0.0085848					11	complement factor I	3426	NM_000204	---	proteolysis /// immune response /// complement activation, classical pathway /// innate immune response	catalytic activity /// serine-type endopeptidase activity /// serine-type endopeptidase activity /// scavenger receptor activity /// peptidase activity /// serine-type peptidase activity /// hydrolase activity	extracellular region /// extracellular space /// membrane
219863_at	HERC5	-3.64421	0.0243566	2.04298	185.612	113.641	379.202	257.638	4q21.23	0.0085848					22	hect domain and RLD 5	51191	NM_016323	---	regulation of cyclin-dependent protein kinase activity /// protein modification process /// modification-dependent protein catabolic process	ligase activity /// acid-amino acid ligase activity	intracellular /// cytoplasm /// perinuclear region of cytoplasm
1555564_a_at	CFI	-3.54933	0.0243566	2.16323	94.3981	83.1434	204.205	145.398	4q21.23	0.0085848					11	complement factor I	3426	NM_000204	---	proteolysis /// immune response /// complement activation, classical pathway /// innate immune response	catalytic activity /// serine-type endopeptidase activity /// serine-type endopeptidase activity /// scavenger receptor activity /// peptidase activity /// serine-type peptidase activity /// hydrolase activity	extracellular region /// extracellular space /// membrane
204844_at	ENPEP	-2.85912	0.0243566	1.87929	68.2622	52.1873	128.284	99.9165	4q21.23	0.0085848					15	glutamyl aminopeptidase (aminopeptidase A)	2028	NM_001977	---	angiogenesis /// proteolysis /// cell-cell signaling /// cell proliferation /// cell proliferation /// cell migration	aminopeptidase activity /// aminopeptidase activity /// calcium ion binding /// peptidase activity /// metalloexopeptidase activity /// metallopeptidase activity /// zinc ion binding /// hydrolase activity /// metal ion binding	plasma membrane /// integral to plasma membrane /// brush border /// external side of plasma membrane /// membrane /// integral to membrane /// apical plasma membrane /// cytoplasmic vesicle /// apical part of cell
218883_s_at	MLF1IP	-2.84843	0.0243566	1.9273	343.218	445.345	661.484	466.009	4q21.23	0.0085848					34	MLF1 interacting protein	79682	NM_024629	---	transcription /// regulation of transcription, DNA-dependent /// signal transduction /// interspecies interaction between organisms /// regulation of transcription	transcription factor activity /// signal transducer activity /// protein binding	condensed chromosome kinetochore /// nucleus /// chromosome /// cytoplasm
236028_at	IBSP	-1.98454	0.0479895	4.10435	45.9181	99.4266	188.464	358.869	4q21.23	0.0085848					30	integrin-binding sialoprotein	3381	NM_004967	---	ossification /// cell adhesion /// extracellular matrix organization /// biomineral formation	protein binding	extracellular region /// extracellular space /// membrane-bounded vesicle
205943_at	TDO2	-1.9736	0.0243566	1.84209	46.1976	16.2419	85.1002	99.7958	4q21.23	0.0085848					52	tryptophan 2,3-dioxygenase	6999	NM_005651	---	tryptophan catabolic process /// tryptophan catabolic process to kynurenine /// tryptophan catabolic process to acetyl-CoA /// NAD metabolic process /// oxidation reduction	tryptophan 2,3-dioxygenase activity /// tryptophan 2,3-dioxygenase activity /// tryptophan 2,3-dioxygenase activity /// iron ion binding /// oxidoreductase activity /// amino acid binding /// oxidoreductase activity, acting on single donors with incorporation of molecular oxygen, incorporation of two atoms of oxygen /// oxygen binding /// heme binding /// metal ion binding	soluble fraction /// cytosol
223121_s_at	SFRP2	3.84473	0.0243566	-3.28222	702.352	763.139	213.987	322.558	4q21.23	0.0085848					44	secreted frizzled-related protein 2	6423	NM_003013	---	somitogenesis /// multicellular organismal development /// anterior/posterior pattern formation /// Wnt receptor signaling pathway /// cell differentiation /// cellular response to extracellular stimulus	protein binding	extracellular region
236333_at	---	4.28199	0.0243566	-2.21388	1221.17	825.109	551.597	516.694	7p22.1	0.0018792					0	---	---	---	---	---	---	---
223122_s_at	SFRP2	4.78404	0.0243566	-4.65934	1832.03	1818.78	393.194	748.336	4q21.23	0.0085848					44	secreted frizzled-related protein 2	6423	NM_003013	---	somitogenesis /// multicellular organismal development /// anterior/posterior pattern formation /// Wnt receptor signaling pathway /// cell differentiation /// cellular response to extracellular stimulus	protein binding	extracellular region
221008_s_at	AGXT2L1	6.35804	0.0243566	-3.78917	2393.35	1713.64	631.629	636.823	4q21.23	0.0085848					2	alanine-glyoxylate aminotransferase 2-like 1	64850	NM_001146590 /// NM_001146627 /// NM_031279 /// NR_027474 /// NR_027475	---	cellular amino acid metabolic process	catalytic activity /// alanine-glyoxylate transaminase activity /// transaminase activity /// transferase activity /// pyridoxal phosphate binding	mitochondrion
202376_at	SERPINA3	-4.78228	0.0243566	2.56881	2222.31	2456.97	5708.7	3247.84
211160_x_at	ACTN1	-4.32699	0.0243566	1.98752	409.078	202.363	813.052	452.153
208637_x_at	ACTN1	-4.32753	0.0243566	2.21632	509.747	321.537	1129.77	691.162
208636_at	ACTN1	-5.00433	0.0243566	2.19004	1014.36	727.688	2221.49	1107.25
226690_at	ADCYAP1R1	5.05243	0.0243566	-1.98746	3982.78	1954.75	2003.96	1385.11
202912_at	ADM	-4.16092	0.0243566	4.22743	217.51	298.991	919.508	831.648
201792_at	AEBP1	-3.15306	0.0243566	2.30324	560.928	615.309	1291.95	1092.01
202820_at	AHR	-3.04214	0.0243566	2.07083	180.367	151.842	373.511	303.833
212543_at	AIM1	-3.27478	0.0243566	1.96542	80.2436	37.46	157.712	117.43
205572_at	ANGPT2	-2.86866	0.0479895	1.92199	207.495	236.756	398.803	292.012
201012_at	ANXA1	-3.93163	0.0243566	3.61735	588.681	1383.79	2129.46	1719.26
201590_x_at	ANXA2	-4.86923	0.0243566	2.41051	1031.48	853.737	2486.39	1387.98
210427_x_at	ANXA2	-4.90719	0.0243566	2.38841	1038.54	862.807	2480.45	1357.06
213503_x_at	ANXA2	-4.95117	0.0243566	2.42361	907.917	751.966	2200.44	1210.62
208816_x_at	ANXA2P2	-5.29407	0.0243566	1.81552	961.134	479.567	1744.96	667.363
202672_s_at	ATF3	-3.41873	0.0243566	1.99235	307.449	317.022	612.547	390.683
205290_s_at	BMP2	5.08951	0.0243566	-2.49439	722.631	477.502	289.702	254.213
205289_at	BMP2	4.83155	0.0243566	-2.61672	1100.03	786.623	420.386	423.45
204531_s_at	BRCA1	-1.89256	0.0243566	1.80046	133.142	49.1541	239.716	284.85
203755_at	BUB1B	-2.97145	0.0370332	1.83409	310.974	341.021	570.354	367.585
200986_at	SERPING1	-3.15743	0.0370332	1.80727	350.467	349.088	633.388	377.817
218232_at	C1QA	-3.59993	0.0243566	1.84417	893.487	611.409	1647.74	968.953
203963_at	CA12	-2.77924	0.0370332	1.86148	396.663	335.245	738.379	576.346
201616_s_at	CALD1	-4.7028	0.0243566	2.0807	372.465	184.796	774.99	414.706
201617_x_at	CALD1	-4.83941	0.0243566	2.07365	334.762	204.72	694.18	347.436
212077_at	CALD1	-5.81446	0.0243566	1.83737	1657.41	855.58	3045.26	1041.54
203065_s_at	CAV1	-4.08009	0.0243566	3.04389	281.869	213.753	857.978	702.584
212097_at	CAV1	-4.25008	0.0243566	3.47793	393.58	428.608	1368.84	1126.74
207714_s_at	SERPINH1	-5.54907	0.0243566	2.06118	297.24	162.222	612.665	264.111
228729_at	CCNB1	-2.44366	0.0243566	1.89525	69.539	89.9591	131.794	111.765
214710_s_at	CCNB1	-2.77727	0.0243566	1.85885	165.755	201.577	308.113	215.182
201743_at	CD14	-3.99334	0.0243566	1.91234	592.564	469.213	1133.18	597.722
1557905_s_at	CD44	-4.18408	0.0243566	2.02626	367.387	187.61	744.42	438.242
217523_at	CD44	-3.26158	0.0243566	2.59958	118.948	75.1381	309.216	292.271
209835_x_at	CD44	-4.39398	0.0243566	2.32031	350.147	219.872	812.451	511.495
212014_x_at	CD44	-4.40875	0.0243566	2.32226	325.772	191.287	756.527	477.892
204489_s_at	CD44	-4.46121	0.0243566	2.11122	922.297	619.449	1947.17	1079.04
204490_s_at	CD44	-4.49455	0.0243566	2.28367	302.832	194.382	691.568	417.168
212063_at	CD44	-4.64012	0.0243566	1.88617	1985.6	1376.12	3745.18	1647.14
202870_s_at	CDC20	-3.6292	0.0243566	2.29834	126.937	130.667	291.744	210.64
208727_s_at	CDC42	-2.78544	0.0243566	2.07414	617.361	370.616	1280.5	1182.89
204252_at	CDK2	-3.22932	0.0243566	1.9653	351.896	196.458	691.58	516.497
204159_at	CDKN2C	-4.4842	0.0243566	2.22671	636.987	610.339	1418.38	766.624
203973_s_at	CEBPD	-4.91477	0.0243566	1.81099	1857.07	1038.28	3363.13	1362.92
209172_s_at	CENPF	-3.07785	0.0243566	2.06371	103.009	122.645	212.581	157.493
207828_s_at	CENPF	-3.78537	0.0243566	1.99726	454.496	431.099	907.748	521.631
225646_at	CTSC	-1.87664	0.0243566	1.95566	83.3759	23.5567	163.055	215.8
225647_s_at	CTSC	-2.53428	0.0243566	2.54039	66.5438	65.549	169.047	200.517
201487_at	CTSC	-3.82256	0.0243566	1.86776	327.45	206.888	611.597	347.103
204260_at	CHGB	3.23044	0.0479895	-1.96033	616.283	415.99	314.376	365.177
209396_s_at	CHI3L1	-3.53551	0.0243566	4.59106	922.451	2035.67	4235.03	4536.51
209395_at	CHI3L1	-3.82806	0.0243566	4.53201	922.247	1957.74	4179.63	4092.65
204170_s_at	CKS2	-2.88188	0.0243566	1.92319	463.139	456.404	890.703	677.841
213436_at	CNR1	-2.78092	0.0370332	2.05661	391.587	523.533	805.343	653.52
1554784_at	CNTN1	3.79374	0.0243566	-1.88102	455.17	335.328	241.981	145.591
1556499_s_at	COL1A1	-4.32086	0.0243566	4.95701	605.215	1064.09	3000.06	2715.46
202311_s_at	COL1A1	-1.79217	0.0243566	4.21215	64.8917	41.7294	273.334	592.258
202310_s_at	COL1A1	-2.38896	0.0243566	6.07015	207.693	327.759	1260.73	2234.63
202404_s_at	COL1A2	-2.55495	0.0243566	5.86806	244.885	361.256	1437	2364.25
202403_s_at	COL1A2	-3.04821	0.0243566	3.38251	600.136	529.33	2029.97	2359.87
229218_at	COL1A2	-3.21966	0.0243566	1.92241	101.61	31.1268	195.337	146.657
201852_x_at	COL3A1	-2.38635	0.0243566	4.41613	326.326	497.504	1441.1	2353.67
211161_s_at	COL3A1	-2.39588	0.0243566	5.29948	149.798	249.862	793.851	1358.31
215076_s_at	COL3A1	-2.6076	0.0243566	4.64553	367.074	624.315	1705.26	2576.09
211981_at	COL4A1	-3.4666	0.0243566	2.87215	617.364	840.522	1773.16	1583.52
211980_at	COL4A1	-4.18038	0.0243566	2.83506	882.278	1150.8	2501.31	1783.97
211966_at	COL4A2	-3.1837	0.0370332	2.62681	349.235	466.053	917.372	842.804
211964_at	COL4A2	-3.91058	0.0243566	2.97153	991.13	1268.94	2945.17	2370.55
212489_at	COL5A1	-3.07346	0.0370332	2.05676	89.592	83.7335	184.269	144.48
212488_at	COL5A1	-3.82425	0.0243566	1.90954	132.208	72.2938	252.456	151.245
221730_at	COL5A2	-4.24309	0.0243566	3.40584	157.158	148.827	535.255	440.967
221729_at	COL5A2	-4.67174	0.0243566	3.27143	250.9	218.651	820.802	600.849
209156_s_at	COL6A2	-2.98623	0.0243566	4.22544	171.075	168.905	722.867	933.953
201438_at	COL6A3	-2.18328	0.0243566	3.95137	136.237	100.199	538.325	936.169
226237_at	COL8A1	-3.10457	0.0243566	3.68248	36.3739	22.5178	133.946	159.396
37892_at	COL11A1	-3.73946	0.0243566	2.45121	326.625	365.02	800.626	587.856
225664_at	COL12A1	-2.86301	0.0243566	2.12235	72.4492	38.762	153.763	141.981
211343_s_at	COL13A1	-1.54139	0.0370332	2.85158	33.3253	4.29948	95.0297	204.098
203477_at	COL15A1	-3.54828	0.0243566	2.44032	50.2221	24.0804	122.558	102.428
235236_at	DOCK2	4.93199	0.0243566	-2.22141	126.218	85.1761	56.8188	34.9032
204646_at	DPYD	-4.80548	0.0243566	2.67575	158.835	209.048	425.004	236.841
219787_s_at	ECT2	-2.68607	0.0370332	1.80508	207.719	260.345	374.949	253.111
204271_s_at	EDNRB	3.71563	0.0243566	-1.97294	1864.47	1503.89	945.022	605.811
206701_x_at	EDNRB	3.48426	0.0370332	-2.02426	1755.6	1558.82	867.28	611.387
221950_at	EMX2	3.55189	0.0243566	-1.98767	324.177	229.499	163.094	157.943
220559_at	EN1	-3.73381	0.0243566	1.9758	56.0721	36.5929	110.787	69.6984
211430_s_at	F7	-2.29702	0.0243566	5.1277	140.282	51.7007	719.325	1284.82
204006_s_at	FCGR3A	-3.42726	0.0243566	2.34031	157.061	154.617	367.572	291.791
213746_s_at	FLNA	-5.41265	0.0243566	2.17052	428.123	234.238	929.249	439.486
200859_x_at	FLNA	-5.80956	0.0243566	2.02712	699.589	351.276	1418.15	575.255
214752_x_at	FLNA	-5.92121	0.0243566	2.02509	713.137	327.667	1444.16	581.497
235629_at	FN1	-3.05208	0.0243566	1.9551	62.8953	23.124	122.966	98.9053
212464_s_at	FN1	-5.19369	0.0243566	2.32761	1890.87	1245.55	4401.2	2287.75
216442_x_at	FN1	-5.27286	0.0243566	2.23712	2970.16	1928.08	6644.59	3257.64
210495_x_at	FN1	-5.29735	0.0243566	2.18613	2976.55	1865.71	6507.1	3108.61
211719_x_at	FN1	-5.39998	0.0243566	2.21571	2875.97	1924.37	6372.33	2982.27
218880_at	FOSL2	-3.44374	0.0243566	1.80613	66.1933	18.4369	119.554	77.8349
225262_at	FOSL2	-3.73226	0.0243566	2.01383	237.495	127.067	478.276	315.381
203698_s_at	FRZB	-3.33748	0.0243566	3.35282	203.887	164.674	683.596	722.812
203697_at	FRZB	-3.3776	0.0243566	3.10025	193.437	172.709	599.703	600.007
227830_at	GABRB3	5.22045	0.0243566	-2.20063	770.914	443.876	350.316	249.091
227690_at	GABRB3	4.34329	0.0243566	-2.08513	586.058	327.684	281.065	264.662
229724_at	GABRB3	3.55605	0.0479895	-1.83951	1166.88	704.502	634.342	560.576
241805_at	GABRG1	4.47252	0.0243566	-2.32926	188.323	129.628	80.8509	76.8826
203282_at	GBE1	-3.98835	0.0243566	2.01972	494.685	229.082	999.128	622.491
202270_at	GBP1	-3.81981	0.0243566	2.74541	214.345	241.52	588.465	466.703
202269_x_at	GBP1	-4.23701	0.0243566	2.68132	206.625	161.618	554.03	400.805
231577_s_at	GBP1	-4.44583	0.0243566	3.21046	191.537	186.545	614.922	465.777
242907_at	GBP2	-2.71187	0.0243566	2.49463	171.684	170.555	428.288	465.867
202748_at	GBP2	-3.58566	0.0243566	2.43854	287.6	206.775	701.323	568.316
229259_at	GFAP	-4.00814	0.0243566	2.24931	1200.77	819.582	2700.92	1810.6
228376_at	GGTA1	4.98684	0.0243566	-2.03976	875.712	485.643	429.322	283.864
200946_x_at	GLUD1	7.17267	0.0243566	-2.02957	2157.73	863.735	1063.14	448.765
200947_s_at	GLUD1	6.97626	0.0243566	-1.90315	2746.68	962.94	1443.23	636.701
215794_x_at	GLUD2	6.69769	0.0243566	-2.14419	1186.59	520.411	553.396	292.707
238663_x_at	GRIA4	5.0226	0.0243566	-2.02649	487.928	272.12	240.775	151.154
215388_s_at	CFH	-2.59986	0.0370332	1.86701	105.197	77.1013	196.403	169.641
209960_at	HGF	-3.1141	0.0243566	1.97349	42.6736	31.0532	84.2161	64.0672
202934_at	HK2	-4.10728	0.0243566	2.30276	352.228	209.968	811.094	548.303
207165_at	HMMR	-2.87952	0.0243566	1.94523	93.417	72.1786	181.717	147.061
235521_at	HOXA3	-3.06042	0.0243566	2.66617	66.1439	88.7262	176.351	171.614
213844_at	HOXA5	-3.2492	0.0243566	2.05606	88.7206	70.1917	182.415	137.662
213150_at	HOXA10	-3.09074	0.0370332	2.33087	106.013	116.471	247.101	216.405
206858_s_at	HOXC6	-2.23996	0.0479895	2.71267	187.596	287.951	508.886	700.003
229400_at	HOXD10	-3.0944	0.0243566	2.05593	147.93	128.527	304.133	239.383
205579_at	HRH1	-3.37557	0.0243566	2.00499	205.976	68.0321	412.979	308.657
213418_at	HSPA6	-2.83155	0.0243566	2.93822	116.246	153.592	341.557	389.671
201841_s_at	HSPB1	-4.76427	0.0243566	1.91119	1409.86	888.924	2694.51	1209.28
241716_at	HSPD1	-2.3315	0.0243566	2.26657	33.4144	13.4447	75.7361	92.0278
202718_at	IGFBP2	-3.40929	0.0243566	3.00311	941.152	1888.8	2826.39	2453.11
212143_s_at	IGFBP3	-2.58339	0.0479895	2.43724	736.532	1303.36	1795.11	1856.17
210095_s_at	IGFBP3	-2.89097	0.0243566	2.73153	764.896	1440.77	2089.33	2081.47
1555997_s_at	IGFBP5	-3.3255	0.0243566	2.38627	117.836	76.5476	281.188	244.051
203425_s_at	IGFBP5	-3.65809	0.0243566	2.04213	153.185	67.5069	312.825	216.904
211958_at	IGFBP5	-3.76762	0.0243566	2.557	388.882	350.918	994.37	777.692
211959_at	IGFBP5	-4.85692	0.0243566	2.29287	2035.58	1708.52	4667.31	2460.19
217022_s_at	IGHA1	-2.86476	0.0243566	4.0322	60.3897	17.2174	243.503	325.679
209374_s_at	IGHM	-1.46766	0.0370332	2.43291	73.1321	11.5769	177.924	363.973
212592_at	IGJ	-1.90494	0.0243566	2.94357	21.5192	1.01292	63.3432	111.949
209138_x_at	IGL@	-2.46752	0.0243566	4.39344	87.4466	16.7283	384.191	613.087
204698_at	ISG20	-2.38269	0.0243566	1.84148	81.8035	24.437	150.64	146.209
205952_at	KCNK3	3.97534	0.0243566	-2.02632	206.116	168.408	101.719	50.6781
220116_at	KCNN2	4.08	0.0243566	-2.15403	882.46	643.723	409.679	353.077
207723_s_at	KLRC3	3.8894	0.0243566	-1.99946	420.686	262.921	210.4	196.364
200650_s_at	LDHA	-5.24373	0.0243566	2.0632	3435.81	2038.97	7088.78	3219.61
204298_s_at	LOX	-2.44995	0.0243566	4.21821	35.618	15.57	150.244	238.293
215446_s_at	LOX	-3.22502	0.0243566	5.4605	33.6659	37.4075	183.833	235.824
202998_s_at	LOXL2	-4.20114	0.0243566	2.11575	260.712	172.581	551.603	329.422
201744_s_at	LUM	-1.8972	0.0243566	4.29541	45.4666	50.323	195.298	400.989
206163_at	MAB21L1	-1.46928	0.0243566	2.07357	37.7704	5.69039	78.3196	140.66
211340_s_at	MCAM	-5.22644	0.0243566	1.80327	360.214	243.186	649.565	218.305
203417_at	MFAP2	-2.3234	0.0370332	1.96015	152.956	105.808	299.817	312.757
202291_s_at	MGP	-2.80922	0.0243566	2.43439	353.414	431.541	860.35	863.587
200600_at	MSN	-6.24493	0.0243566	2.39532	967.157	811.194	2316.65	926.11
214770_at	MSR1	-3.694	0.0243566	1.96968	99.8471	88.9876	196.667	116.498
202086_at	MX1	-3.40212	0.0243566	2.10935	557.807	443.335	1176.61	868.156
225301_s_at	MYO5B	-2.78842	0.0243566	2.2776	122.203	153.033	278.329	262.344
229799_s_at	NCAM1	4.69042	0.0243566	-2.03221	899.96	435.393	442.847	379.816
217359_s_at	NCAM1	4.56567	0.0243566	-1.808	660.227	307.755	365.17	239.34
202237_at	NNMT	-2.91289	0.0243566	5.51246	168.102	393.756	926.658	1295.85
202238_s_at	NNMT	-2.92392	0.0243566	3.77796	160.225	207.065	605.324	761.1
207414_s_at	PCSK6	4.7681	0.0243566	-1.86518	673.525	387.622	361.105	173.892
202628_s_at	SERPINE1	-3.39932	0.0243566	2.34314	217.44	182.725	509.491	416.928
202627_s_at	SERPINE1	-4.04301	0.0243566	2.35158	295.736	236.99	695.445	472.976
229831_at	CNTN3	3.94606	0.0370332	-2.17276	433.082	329.147	199.324	180.432
231666_at	PAX3	-2.22732	0.0243566	2.78027	38.7928	18.8647	107.854	157.493
226452_at	PDK1	-3.64442	0.0243566	2.35581	205.465	151.954	484.037	373.369
202833_s_at	SERPINA1	-3.20617	0.0243566	1.95526	170.501	167.409	333.374	227.85
211429_s_at	SERPINA1	-3.52356	0.0243566	1.89454	272.328	245.302	515.936	302.793
203649_s_at	PLA2G2A	-2.61529	0.0243566	2.94414	181.512	66.2725	534.396	686.286
205479_s_at	PLAU	-2.36319	0.0243566	2.16919	186.928	74.008	405.481	468.413
211668_s_at	PLAU	-2.73948	0.0243566	2.41129	84.4967	39.9227	203.746	220.006
202620_s_at	PLOD2	-4.03882	0.0243566	2.06383	525.085	335.251	1083.69	660.664
202619_s_at	PLOD2	-4.43645	0.0243566	2.03561	324.192	176.049	659.93	363.475
201136_at	PLP2	-4.52096	0.0243566	2.26239	303.82	176.24	687.358	412.674
202430_s_at	PLSCR1	-4.07898	0.0243566	1.86901	116.472	71.0241	217.687	115.223
202446_s_at	PLSCR1	-4.08958	0.0243566	1.81927	514.293	269.625	935.636	486.424
211341_at	POU4F1	-2.14312	0.0243566	2.15764	35.9038	10.1048	77.4674	98.6099
210916_s_at	CD44	-3.86092	0.0243566	2.19938	251.099	129.704	552.263	386.115
207808_s_at	PROS1	-4.04834	0.0243566	2.04675	378.841	265.074	775.394	459.795
206157_at	PTX3	-2.56478	0.0243566	2.32053	66.2328	85.5753	153.695	162.076
215127_s_at	RBMS1	-4.22993	0.0243566	1.92061	471.209	299.318	905.01	474.266
203423_at	RBP1	-3.04446	0.0243566	2.84453	457.335	988.602	1300.91	1211.11
211421_s_at	RET	2.75326	0.0243566	-2.22884	140.325	190.634	62.9589	29.0654
213397_x_at	RNASE4	-3.08189	0.0243566	2.1217	87.3521	71.4235	185.335	153.355
209773_s_at	RRM2	-2.70863	0.0370332	1.84238	354.32	423.023	652.793	467.733
201890_at	RRM2	-3.23644	0.0243566	2.15422	272.959	366.937	588.014	416.475
217728_at	S100A6	-4.77565	0.0243566	1.92718	1980.19	1178.12	3816.19	1758.13
202917_s_at	S100A8	-2.83078	0.0243566	2.4796	208.71	247.637	517.517	525.542
200660_at	S100A11	-5.05159	0.0243566	1.98179	396.851	305.512	786.474	322.665
200832_s_at	SCD	6.34721	0.0243566	-1.82875	4184.42	1697.3	2288.14	871.92
214974_x_at	CXCL5	1.96234	0.0479895	-2.38915	88.9156	178.936	37.2163	26.52
210135_s_at	SHOX2	-3.31779	0.0243566	3.38038	69.1579	152.342	233.78	226.804
1558010_s_at	SLC1A2	4.03501	0.0243566	-2.18472	1060.01	759.444	485.19	463.934
1558009_at	SLC1A2	3.89427	0.0243566	-2.39646	450.705	362.231	188.071	217.216
209610_s_at	SLC1A4	5.76239	0.0243566	-2.08076	2116.97	1125.22	1017.4	510.767
212811_x_at	SLC1A4	5.51311	0.0243566	-1.82789	1667.13	796.196	912.052	379.916
212810_s_at	SLC1A4	5.04527	0.0243566	-1.92533	1036.71	541.361	538.458	307.936
205152_at	SLC6A1	5.94906	0.0243566	-2.12267	2402.41	957.45	1131.79	830.372
228754_at	SLC6A6	-2.81459	0.0370332	2.11364	228.376	170.637	482.705	443.307
205316_at	SLC15A2	5.09438	0.0243566	-2.45779	1194.93	865.614	486.181	312.052
205317_s_at	SLC15A2	4.10965	0.0243566	-1.97136	380.136	296.597	192.829	79.7459
240159_at	SLC15A2	3.19721	0.0479895	-2.00701	231.487	235.017	115.34	66.2923
207308_at	SLCO1A2	3.67598	0.0370332	-2.07065	158.84	136.465	76.7102	53.771
1566342_at	---	-4.36902	0.0243566	2.23472	176.45	98.4339	394.316	243.729
215078_at	SOD2	-3.21734	0.0243566	1.8659	23.8583	3.13997	44.5172	32.6597
215223_s_at	SOD2	-4.54888	0.0243566	2.72266	215.039	180.483	585.478	393.421
216841_s_at	SOD2	-4.65802	0.0243566	2.85121	136.216	140.117	388.38	256.052
202863_at	SP100	-4.18551	0.0243566	1.83085	92.8223	71.2679	169.943	77.9484
235591_at	SSTR1	3.30253	0.0479895	-2.08906	109.095	102.181	52.2218	45.333
204597_x_at	STC1	-2.65647	0.0370332	2.03459	116.383	91.7455	236.791	221.037
208079_s_at	AURKA	-3.81969	0.0243566	1.84797	90.1369	72.8647	166.57	86.804
205547_s_at	TAGLN	-2.65136	0.0370332	1.98051	438.667	501.361	868.786	740.33
226388_at	TCEA3	-3.84296	0.0243566	1.81568	59.9485	23.2127	108.847	62.5918
212758_s_at	TCF8	3.98358	0.0243566	-1.96182	1155.59	849.017	589.042	368.039
203303_at	DYNLT3	-3.83834	0.0243566	1.82977	566.476	439.565	1036.52	534.091
209676_at	TFPI	-3.18487	0.0370332	2.05293	36.8808	18.5187	75.7137	60.6597
210664_s_at	TFPI	-3.53386	0.0243566	1.99209	48.3129	28.3321	96.2437	65.9412
213258_at	TFPI	-3.96114	0.0243566	3.12202	120.925	117.396	377.531	318.818
209908_s_at	TGFB2	-1.86049	0.0243566	2.33656	77.5328	42.3991	181.16	282.289
220407_s_at	TGFB2	-2.14247	0.0243566	2.41306	127.969	91.3227	308.795	425.081
228121_at	TGFB2	-3.80091	0.0243566	2.73859	499.146	483.771	1366.95	1108.4
201506_at	TGFBI	-3.48054	0.0243566	2.26121	623.711	508.68	1410.34	1089.92
203313_s_at	TGIF	-3.69436	0.0243566	1.87202	241.904	196.28	452.851	252.787
201109_s_at	THBS1	-2.87748	0.0243566	2.25158	57.961	27.8325	130.504	126.907
201110_s_at	THBS1	-3.41243	0.0243566	4.08457	42.2442	42.5404	172.549	192.174
201666_at	TIMP1	-3.93296	0.0243566	2.8288	1111.05	1657.53	3142.93	2334.81
201291_s_at	TOP2A	-2.98468	0.0243566	2.4234	209.933	326.652	508.752	450.35
201292_at	TOP2A	-3.66771	0.0243566	2.44885	411.648	573.469	1008.06	713.704
204822_at	TTK	-2.99249	0.0243566	1.96172	97.4662	120.564	191.201	132.803
213943_at	TWIST1	-2.62396	0.0243566	1.80959	88.5793	58.7805	160.292	132.471
212865_s_at	COL14A1	-2.26121	0.0243566	1.86262	31.4107	18.1898	58.5064	59.6158
210513_s_at	VEGFA	-3.82132	0.0243566	4.25214	331.655	331.291	1410.24	1418.42
212171_x_at	VEGFA	-4.06574	0.0243566	4.07324	691.155	568.245	2815.24	2630.87
211527_x_at	VEGFA	-4.10907	0.0243566	6.23529	324.419	476.801	2022.85	2078.19
210512_s_at	VEGFA	-4.90341	0.0243566	4.33042	1138.77	1225.81	4931.35	3839.3
1555938_x_at	VIM	-2.04456	0.0243566	3.21222	52.3178	53.0203	168.056	285.996
212533_at	WEE1	-2.65747	0.0370332	1.99897	507.753	578.363	1014.99	875.23
230836_at	ST8SIA4	-3.39356	0.0243566	1.90878	48.7128	32.5403	92.9817	62.0558
210978_s_at	TAGLN2	-3.94064	0.0243566	1.90036	504.553	355.587	958.832	526.345
200916_at	TAGLN2	-4.446	0.0243566	2.02565	620.944	459.945	1257.81	647.235
222717_at	SDPR	5.0952	0.0243566	-2.3621	166.54	118.062	70.5051	41.0661
204407_at	TTF2	-2.16367	0.0243566	2.45223	40.3272	17.711	98.8918	137.399
205567_at	CHST1	4.0311	0.0243566	-1.85543	1247.01	686.268	672.088	523.22
210138_at	RGS20	4.25651	0.0243566	-2.30554	294.941	228.598	127.927	108.272
209160_at	AKR1C3	5.47379	0.0243566	-2.73732	670.271	412.338	244.864	254.84
205000_at	DDX3Y	-2.96841	0.0479895	1.85103	321.526	327.408	595.156	403.565
210738_s_at	SLC4A4	3.72422	0.0370332	-2.10516	287.421	216.503	136.532	131.49
208161_s_at	ABCC3	-4.32538	0.0243566	2.20013	162.883	49.8188	358.363	227.508
209641_s_at	ABCC3	-4.51402	0.0243566	2.08171	152.824	56.8518	318.136	181.987
210840_s_at	IQGAP1	-4.01114	0.0243566	1.80103	382.772	130.63	689.383	377.725
200791_s_at	IQGAP1	-4.18517	0.0243566	1.8333	656.093	277.622	1202.81	633.985
212298_at	NRP1	-3.80139	0.0243566	2.00277	132.235	109.294	264.836	158.637
204304_s_at	PROM1	-2.91798	0.0243566	3.46866	245.464	335.025	851.431	1029.79
203240_at	FCGBP	-3.83689	0.0243566	2.20858	576.246	671.633	1272.68	782.473
202733_at	P4HA2	-4.74027	0.0243566	1.93868	163.327	78.0079	316.637	154.597
218009_s_at	PRC1	-3.20911	0.0370332	1.94088	293.603	323.938	569.85	368.54
215506_s_at	DIRAS3	-2.63821	0.0479895	2.09136	195.35	289.36	408.548	352.76
204465_s_at	INA	4.69673	0.0243566	-2.33674	1633.45	1115.26	699.029	596.151
208690_s_at	PDLIM1	-3.01648	0.0243566	2.84245	284.646	267.238	809.091	864.422
205729_at	OSMR	-3.84036	0.0243566	2.11891	74.851	35.71	158.603	108.05
227425_at	REPS2	4.51672	0.0243566	-1.85157	458.469	264.076	247.611	137.442
231798_at	NOG	5.09081	0.0243566	-2.52808	202.682	146.397	80.1726	58.7207
203645_s_at	CD163	-3.80549	0.0243566	2.66486	336.043	608.046	895.507	601.402
215049_x_at	CD163	-3.82764	0.0243566	2.64933	450.186	798.427	1192.69	795.665
235438_at	CYP7B1	4.39804	0.0243566	-1.97193	157.695	105.253	79.9699	46.04
205483_s_at	ISG15	-2.24851	0.0370332	2.33621	948.512	847.421	2215.92	2805.66
228813_at	HDAC4	6.21666	0.0243566	-1.83186	757.112	336.497	413.303	134.871
204530_s_at	TOX	4.69711	0.0243566	-2.12574	117.57	90.5865	55.3076	11.1133
204529_s_at	TOX	4.09376	0.0243566	-2.04707	575.262	459.686	281.017	140.933
205150_s_at	KIAA0644	4.30441	0.0243566	-2.16289	1073.58	801.637	496.365	345.634
236641_at	KIF14	-2.59583	0.0370332	1.91032	51.9552	61.2703	99.2508	81.2255
206364_at	KIF14	-3.04952	0.0243566	1.83692	95.1364	98.7245	174.758	111.556
204485_s_at	TOM1L1	-2.75008	0.0243566	2.22968	52.263	43.7519	116.53	114.726
201664_at	SMC4	-3.13639	0.0243566	1.80839	428.493	589.043	774.884	359.435
228776_at	GJA7	-4.75063	0.0243566	2.25152	249.734	290.873	562.279	258.281
211184_s_at	USH1C	3.96143	0.0370332	-2.0989	356.646	287.019	169.921	114.648
218755_at	KIF20A	-3.2178	0.0243566	2.02924	132.797	135.217	269.476	192.37
202206_at	ARL4C	-3.46061	0.0243566	1.95652	595.711	491.77	1165.52	757.566
202207_at	ARL4C	-3.58545	0.0243566	2.10672	696.151	559.694	1466.59	1015.3
202208_s_at	ARL4C	-4.00891	0.0243566	1.98333	380.72	258.103	755.096	436.645
201829_at	NET1	7.51949	0.0243566	-2.10695	787.996	293.272	373.999	179.511
201830_s_at	NET1	6.91378	0.0243566	-2.13528	875.344	326.797	409.944	244.879
204162_at	KNTC2	-2.86524	0.0243566	2.06049	100.785	134.332	207.666	162.493
213993_at	SPON1	6.34027	0.0243566	-3.0147	525.823	331.951	174.42	142.058
209436_at	SPON1	6.13596	0.0243566	-2.03663	2079.86	922.259	1021.23	559.65
213994_s_at	SPON1	5.7432	0.0243566	-2.56006	680.768	412.692	265.919	208.338
209437_s_at	SPON1	4.87031	0.0243566	-1.95589	628	332.331	321.081	208.399
203088_at	FBLN5	-2.22373	0.0243566	2.30597	316.097	173.518	728.91	937.929
214453_s_at	IFI44	-4.0362	0.0243566	1.91556	361.125	217.052	691.757	385.939
209288_s_at	CDC42EP3	-2.72416	0.0370332	2.00772	105.457	65.5915	211.728	192.968
226658_at	PDPN	-3.53445	0.0243566	2.73077	196.275	195.535	535.982	468.477
221898_at	PDPN	-3.65655	0.0243566	3.49323	201.752	314.472	704.764	662.161
204879_at	PDPN	-3.81374	0.0243566	2.53086	125.732	92.6527	318.209	248.145
203819_s_at	IGF2BP3	-2.76629	0.0243566	2.21044	116.483	231.496	257.478	196.255
203820_s_at	IGF2BP3	-2.91642	0.0370332	2.29112	165.028	323.583	378.099	286.467
231980_at	CD226	3.27435	0.0243566	-2.13623	175.487	175.293	82.1476	66.9578
1556599_s_at	ARPP-21	5.01422	0.0243566	-2.1622	183.208	123.021	84.7325	42.7847
1560018_at	ARPP-21	4.54733	0.0243566	-2.03533	218.152	138.78	107.183	71.0697
1556598_at	ARPP-21	4.32381	0.0243566	-2.03642	60.0231	42.7467	29.4748	17.5512
231935_at	ARPP-21	5.25151	0.0243566	-1.97363	328.17	158.726	166.278	105.178
203474_at	IQGAP2	-2.92134	0.0243566	1.93436	139.93	171.422	270.674	190.161
203571_s_at	C10orf116	4.03434	0.0243566	-1.88885	371.645	258.897	196.758	112.039
226136_at	GLIPR1	-3.41185	0.0243566	2.23758	223.455	144.174	499.998	399.441
214085_x_at	GLIPR1	-3.76953	0.0243566	2.36277	398.158	240.742	940.754	712.26
204221_x_at	GLIPR1	-3.79937	0.0243566	1.95935	153.433	65.8533	300.63	191.51
226142_at	GLIPR1	-3.82487	0.0243566	2.07429	148.663	119.494	308.372	193.898
204222_s_at	GLIPR1	-4.20341	0.0243566	2.17967	153.432	107.754	334.43	204.741
209183_s_at	C10orf10	-3.8181	0.0243566	1.85504	429.594	274.444	796.916	447.038
226279_at	PRSS23	-3.91823	0.0243566	2.19207	129.663	97.7991	284.231	187.828
202458_at	PRSS23	-4.10532	0.0243566	2.3513	310.897	274.474	731.011	481.116
208782_at	FSTL1	-4.28041	0.0243566	2.0318	1248.51	1103.81	2536.72	1301.91
1554966_a_at	FILIP1L	-3.758	0.0243566	2.38383	90.2934	40.9083	215.244	166.843
204135_at	FILIP1L	-3.86954	0.0243566	2.38498	232.838	86.1765	555.315	420.179
212169_at	FKBP9	-4.50885	0.0243566	1.82009	596.774	323.271	1086.18	499.717
205773_at	CPEB3	6.03886	0.0243566	-1.91112	149.68	65.1661	78.3205	36.4722
202878_s_at	CD93	-3.43479	0.0243566	1.89323	320.606	288.674	606.98	368.233
213308_at	SHANK2	4.26652	0.0243566	-1.89658	566.792	317.056	298.85	219.3
213307_at	SHANK2	3.76517	0.0370332	-1.80698	250.364	167.976	138.554	87.4318
243681_at	SHANK2	3.65174	0.0243566	-1.88543	109.817	73.6873	58.2451	47.3762
210052_s_at	TPX2	-3.35443	0.0243566	1.81056	249.426	220.955	451.599	260.771
204150_at	STAB1	-4.62623	0.0243566	1.82864	384.53	171.676	703.168	327.686
212646_at	RFTN1	-4.62802	0.0243566	1.8929	424.56	218.529	803.651	385.463
244300_at	LPHN3	3.42927	0.0479895	-2.12552	247.845	221.865	116.605	106.853
213920_at	CUTL2	4.78685	0.0243566	-2.79603	288.753	215.77	103.272	117.55
205176_s_at	ITGB3BP	-4.41749	0.0243566	1.87536	266.009	133.115	498.862	250.286
219743_at	HEY2	4.87976	0.0243566	-1.93695	1009.54	592.105	521.202	265.495
206899_at	NTSR2	2.90482	0.0243566	-3.28073	806.096	1317.87	245.706	163.973
206584_at	LY96	-3.80408	0.0243566	2.2172	189.288	156.01	419.689	286.693
207447_s_at	MGAT4C	5.47321	0.0243566	-3.00377	118.404	89.0346	39.4183	33.4801
209596_at	MXRA5	-2.18033	0.0479895	2.26993	225.346	219.155	511.52	649.531
214930_at	SLITRK5	5.62901	0.0243566	-1.83213	486.399	193.394	265.483	140.667
211864_s_at	FER1L3	-5.01107	0.0243566	2.07231	99.5497	47.8312	206.298	102.759
201798_s_at	FER1L3	-5.73401	0.0243566	2.12725	242.492	142.495	515.841	219.291
223380_s_at	LATS2	-5.73555	0.0243566	2.12313	145.855	72.4604	309.668	135.518
227013_at	LATS2	-6.06449	0.0243566	2.30916	173.908	127.388	401.581	166.897
224795_x_at	IGKC	-2.64486	0.0243566	2.03083	910.493	168.131	1849.05	1805.21
221651_x_at	IGKC	-2.67266	0.0243566	2.00202	475.742	73.2306	952.448	907.881
221671_x_at	IGKC	-2.6916	0.0243566	2.04633	503.013	91.2145	1029.33	994.806
215121_x_at	IGL@	-2.46157	0.0243566	2.76585	97.6795	16.678	270.167	357.088
214677_x_at	IGL@	-2.54028	0.0243566	4.78367	110.368	25.6382	527.966	838.018
215379_x_at	IGL@	-2.53887	0.0243566	2.94982	101.671	15.0009	299.911	397.988
219196_at	SCG3	5.80189	0.0243566	-2.52154	1547.7	880.114	613.791	504.066
1554452_a_at	HIG2	-3.81596	0.0243566	3.05458	342.111	153.661	1045	932.397
218507_at	HIG2	-3.83121	0.0243566	2.45262	498.937	167.939	1223.7	956.652
219649_at	ALG6	-3.20089	0.0243566	1.93694	425.534	174.885	824.234	621.95
222646_s_at	ERO1L	-2.85109	0.0243566	2.13368	211.076	92.8619	450.368	422.469
226913_s_at	SOX8	5.95686	0.0243566	-1.84414	7432.91	2707.32	4030.55	2124.11
1555230_a_at	KCNIP2	3.50268	0.0243566	-2.16599	96.7322	91.2431	44.6595	35.1685
223727_at	KCNIP2	3.36198	0.0243566	-1.81655	927.095	697.687	510.362	368.535
229947_at	PI15	-1.9451	0.0243566	1.81668	36.5515	10.6435	66.4026	77.8607
218039_at	NUSAP1	-3.1487	0.0243566	1.87614	683.264	738.522	1281.9	802.725
206013_s_at	ACTL6B	4.87653	0.0243566	-2.10753	203.497	134.903	96.5573	51.4372
225665_at	ZAK	-4.18937	0.0243566	1.91416	339.35	265.457	649.569	323.103
225662_at	ZAK	-4.20042	0.0243566	2.16807	167.114	151.385	362.316	209.134
223519_at	ZAK	-4.90532	0.0243566	2.35663	122.405	98.8992	288.465	156.52
227401_at	IL17D	4.298	0.0243566	-1.968	1923.11	1242.51	977.19	650.472
219643_at	LRP1B	5.4925	0.0243566	-1.92525	370.905	170.526	192.653	107.857
222150_s_at	LOC54103	-3.85715	0.0243566	1.85007	179.022	150.874	331.202	167.757
228531_at	SAMD9	-3.66343	0.0243566	2.03641	95.6089	46.457	194.698	133.615
1554154_at	GDAP2	-1.55687	0.0243566	1.84967	303.809	98.4436	561.946	842.333
226811_at	FAM46C	-1.58089	0.0479895	1.88405	47.2117	15.9225	88.9493	134.11
219093_at	FLJ20701	6.27671	0.0243566	-2.16794	1086.86	529.13	501.334	273.139
219410_at	TMEM45A	-3.49314	0.0243566	2.09043	339.36	269.312	709.408	502.488
1555958_at	CRTAC1	6.37777	0.0243566	-2.07833	375.155	176.945	180.508	85.1957
219230_at	TMEM100	4.17788	0.0243566	-2.11659	2412.18	1557.92	1139.65	1047.57
229818_at	SVOP	3.91745	0.0243566	-1.82238	269.906	175.821	148.106	91.5933
221766_s_at	FAM46A	-2.65759	0.0243566	1.91778	303.008	256.78	581.103	498.98
218796_at	C20orf42	4.80255	0.0243566	-2.11825	2051.67	1283.21	968.57	656.121
60474_at	C20orf42	4.34437	0.0243566	-2.07943	1549.56	1006.91	745.185	584.936
204723_at	SCN3B	2.96356	0.0479895	-1.93996	942.767	816.368	485.971	506.676
219148_at	PBK	-2.56133	0.0479895	1.93614	296.102	441.133	573.296	446.215
218541_s_at	C8orf4	-2.9658	0.0243566	2.89313	60.255	71.3632	174.326	188.955
213340_s_at	KIAA0495	-3.95603	0.0243566	1.94307	277.347	200.446	538.907	303.139
229294_at	JPH3	4.16399	0.0243566	-1.93362	889.245	532.133	459.887	350.79
214279_s_at	NDRG2	4.27573	0.0243566	-1.85845	3093.54	1542.01	1664.58	1271.22
232059_at	DSCAML1	6.31068	0.0243566	-1.96221	442.556	202.309	225.539	92.6141
226884_at	LRRN1	4.82739	0.0243566	-1.81707	1162.46	594.037	639.742	337.196
227188_at	C21orf63	-2.11263	0.0243566	1.96822	96.6264	56.7698	190.182	221.905
223315_at	NTN4	4.28322	0.0243566	-2.05425	157.092	116.612	76.4718	42.9597
223487_x_at	GNB4	-3.46121	0.0243566	1.96262	205.57	70.0075	403.457	286.935
220927_s_at	HPSE2	3.73548	0.0243566	-1.84847	242.942	201.605	131.429	33.9814
221623_at	BCAN	6.24844	0.0243566	-2.29015	747.818	382.552	326.536	197.276
222848_at	CENPK	-2.63881	0.0243566	2.14361	86.2613	130.591	184.911	164.618
223218_s_at	NFKBIZ	-2.96296	0.0243566	1.94861	191.962	117.872	374.06	301.129
218618_s_at	FNDC3B	-5.78203	0.0243566	1.91467	263.891	120.265	505.264	193.585
1553344_at	PCDH15	4.43402	0.0243566	-2.43484	64.504	53.4239	26.4921	19.1008
213924_at	MPPE1	5.11476	0.0243566	-1.82118	516.185	253.646	283.434	137.809
221477_s_at	MGC5618	-5.25241	0.0243566	2.20007	1311.58	807.731	2885.56	1407.63
239272_at	MMP28	5.40056	0.0243566	-1.9113	91.8384	52.1369	48.0501	15.3908
220345_at	LRRTM4	3.84617	0.0243566	-1.87705	80.1501	61.5243	42.7001	20.3637
235388_at	CHD9	3.04775	0.0479895	-1.94394	152.69	130.225	78.5468	78.7487
228509_at	SKIP	3.24613	0.0479895	-2.17266	874.414	764.001	402.463	483.133
231838_at	C20orf119	-3.43386	0.0243566	2.0085	103.845	33.5363	208.572	153.54
1569003_at	TMEM49	-3.48966	0.0243566	3.0449	271.866	280.689	827.806	785.622
223381_at	NUF2	-2.76586	0.0370332	2.03388	90.8876	121.386	184.854	148.419
235940_at	C9orf64	-3.09278	0.0370332	1.88695	108.621	120.067	204.963	131.987
223592_s_at	RNF135	-4.75322	0.0243566	1.96033	250.803	201.759	491.657	211.445
239221_at	GPR123	5.34021	0.0243566	-1.80211	286.665	140.587	159.072	64.3177
226623_at	PHYHIPL	6.30335	0.0243566	-1.91341	4057.83	1465.38	2120.74	1136.8
1552439_s_at	MEGF11	4.94253	0.0243566	-2.48222	654.815	489.963	263.802	180.808
209191_at	TUBB6	-3.1441	0.0370332	1.89182	348.873	422.087	660.007	397.627
214131_at	CYorf15B	-3.23488	0.0243566	1.88259	84.1317	69.7321	158.385	105.192
227239_at	FAM126A	-4.40927	0.0243566	2.04232	752.169	486.324	1536.17	833.002
201896_s_at	PSRC1	-4.39224	0.0243566	2.02531	821.967	569.007	1664.74	884.233
1558706_a_at	ATOH8	3.32996	0.0479895	-2.6922	166.511	208.282	61.8495	46.7585
228890_at	ATOH8	5.22476	0.0243566	-2.20702	501.321	327.966	227.148	115.471
226487_at	C12orf34	5.51842	0.0243566	-1.85921	765.57	365.245	411.773	186.035
223276_at	MST150	-4.08599	0.0243566	1.95456	290.289	172.863	567.386	321.543
228790_at	C8orf72	6.04836	0.0243566	-2.06313	1611.17	831.946	780.934	339.095
221959_at	C8orf72	5.63672	0.0243566	-2.16391	1022.95	612.292	472.732	211.337
232668_at	C8orf72	2.78906	0.0370332	-2.17755	365.792	450.82	167.983	143.859
1562415_a_at	SPOCD1	-2.88125	0.0243566	2.00393	142.796	85.9272	286.153	245.694
235417_at	SPOCD1	-2.82735	0.0370332	2.34933	312.841	288.085	734.967	731.169
213797_at	RSAD2	-2.2363	0.0243566	1.87931	120.856	59.2878	227.125	238.346
242625_at	RSAD2	-2.24903	0.0243566	2.00752	111.982	70.5839	224.805	250.464
213369_at	PCDH21	4.76855	0.0243566	-1.89126	230.348	137.295	121.796	57.1218
213455_at	FAM114A1	-6.477	0.0243566	1.90039	306.745	117.548	582.936	199.479
225799_at	MGC4677	-3.02208	0.0243566	1.99893	263.441	329.65	526.602	371.873
240228_at	CSMD3	7.14966	0.0243566	-3.20876	353.138	216.706	110.054	67.9516
1553765_a_at	KIAA1900	4.77134	0.0243566	-2.03565	119.528	74.3972	58.7171	35.0025
234472_at	GALNT13	5.62622	0.0243566	-2.18953	799.061	444.94	364.946	218.078
243779_at	GALNT13	4.7037	0.0243566	-2.32704	643.523	423.341	276.541	247.363
217966_s_at	FAM129A	-5.10221	0.0243566	2.12375	82.1678	22.414	174.503	90.7915
217967_s_at	FAM129A	-5.73161	0.0243566	2.50807	150.549	101.541	377.586	187.646
229901_at	ZNF488	3.68684	0.0370332	-1.90153	811.094	636.737	426.547	251.486
241698_at	RFTN2	5.11811	0.0243566	-1.81652	732.224	318.227	403.091	229.494
225314_at	OCIAD2	-3.47361	0.0243566	2.48328	333.88	279.7	829.116	697.219
238756_at	GAS2L3	-3.40668	0.0243566	2.50395	133.148	177.511	333.396	269.754
238453_at	FGFBP3	5.16168	0.0243566	-1.87929	314.64	163.132	167.425	82.0635
228033_at	E2F7	-2.47481	0.0243566	3.14586	45.9341	41.4505	144.502	200.782
1553392_at	EFCAB3	-2.47475	0.0243566	1.80838	24.6716	3.28215	44.6156	41.0221
222039_at	LOC146909	-3.09413	0.0243566	2.10677	353.022	364.777	743.737	585.246
227868_at	LOC154761	-3.54297	0.0243566	2.1552	164.307	57.9974	354.116	269.815
227467_at	RDH10	-2.42795	0.0243566	2.20519	222.836	84.4915	491.397	560.575
226021_at	RDH10	-2.5666	0.0243566	3.0504	196.959	145.866	600.804	795.098
230865_at	LIX1	3.13472	0.0479895	-1.84843	843.508	616.726	456.338	436.58
229551_x_at	ZNF367	-2.96215	0.0243566	1.82186	173.899	154.605	316.82	218.128
235763_at	SLC44A5	-3.11909	0.0479895	1.96585	113.571	91.502	223.264	166.198
1553202_at	STOX1	4.44462	0.0243566	-1.85388	57.1036	38.0248	30.8021	11.2817
229378_at	STOX1	4.87423	0.0243566	-2.14761	340.088	240.318	158.357	69.713
1554547_at	FAM13C1	6.50611	0.0243566	-1.93505	739.853	312.406	382.343	160.129
212989_at	TMEM23	6.04107	0.0243566	-1.86059	424.387	167.909	228.093	110.363
219918_s_at	ASPM	-3.05579	0.0243566	2.24477	118.282	167.142	265.516	212.666
239468_at	MKX	4.87781	0.0243566	-2.91381	81.3036	74.5617	27.9028	10.2362
238320_at	TncRNA	-4.25985	0.0243566	3.12025	310.65	240.281	969.306	768.319
224566_at	TncRNA	-4.65518	0.0243566	2.90811	945.439	628.588	2749.44	1921.09
214657_s_at	TncRNA	-4.69314	0.0243566	4.1806	83.218	60.9761	347.902	284.051
224565_at	TncRNA	-5.05018	0.0243566	2.48861	973.517	590.122	2422.7	1397.25
227062_at	TncRNA	-5.16159	0.0243566	3.32646	468.468	328.72	1558.34	1049.12
234989_at	TncRNA	-6.82067	0.0243566	2.33723	2537.89	1410.28	5931.62	2315.07
229875_at	ZDHHC22	6.44549	0.0243566	-1.93837	975.594	398.807	503.306	231.185
230783_at	LOC283713	3.91181	0.0243566	-1.80275	126.463	72.5572	70.1498	50.363
235527_at	LOC284214	4.09701	0.0243566	-1.85631	469.666	276.332	253.01	177.048
236308_at	LOC285878	3.62887	0.0243566	-2.43118	354.445	316.786	145.792	177.761
230117_at	LOC285878	3.40938	0.0370332	-2.07679	415.053	335.929	199.853	206.06
231131_at	RP1-32F7.2	5.26102	0.0243566	-1.89704	155.7	83.2453	82.075	36.5825
230244_at	UNQ830	3.54678	0.0243566	-2.59608	662.604	749.509	255.233	196.737
242977_at	LOC400796	2.91463	0.0479895	-2.99808	70.4549	111.445	23.5	4.51697
238081_at	C4orf12	4.7273	0.0243566	-1.88693	320.556	171.268	169.882	102.59
224917_at	MIRN21	-3.40388	0.0243566	3.3507	506.307	631.272	1696.48	1721.29
235981_at	C8orf22	-1.667	0.0243566	2.31865	42.3055	6.77991	98.0917	170.565
227628_at	LOC493869	-2.96541	0.0243566	1.89903	44.8755	27.2256	85.2199	66.4152
238022_at	LOC643911	-3.13208	0.0243566	2.15703	100.689	130.311	217.189	163.626
238021_s_at	LOC643911	-3.90285	0.0243566	2.6746	252.148	377.038	674.395	476.786
1555216_a_at	LOC645722	3.87087	0.0243566	-1.81394	302.97	226.515	167.023	65.4007
230782_at	LOC653381	4.31741	0.0243566	-2.04129	176.382	138.467	86.4071	30.1091
225834_at	FAM72A	-3.21487	0.0243566	2.05072	161.415	133.665	331.016	250.367
233599_at	LOC728061	-5.27705	0.0243566	1.80219	84.6787	22.0232	152.607	63.6038
230869_at	LOC728215	4.23169	0.0243566	-2.2775	364.992	251.273	160.26	163.273
236034_at	---	-3.35369	0.0243566	2.0045	100.438	89.0379	201.329	138.694
235609_at	---	-3.09853	0.0243566	1.85888	117.75	94.1822	218.884	151.306
240218_at	---	4.48023	0.0243566	-1.91268	210.245	141.223	109.921	47.2646
228188_at	---	-3.73492	0.0243566	2.0793	233.822	90.9215	486.186	337.973
227769_at	---	3.84928	0.0370332	-1.90036	1288.55	840.566	678.054	520.846
228642_at	---	-3.32384	0.0243566	2.2763	84.5477	76.5956	192.456	155.645
229490_s_at	---	-2.45458	0.0243566	1.88026	57.0146	60.843	107.202	94.1505
236656_s_at	---	4.3975	0.0243566	-1.87131	365.625	192.92	195.384	137.136
208933_s_at	---	-4.17737	0.0243566	1.81338	185.465	123.077	336.319	160.316
1558388_a_at	FLJ39198	3.72389	0.0243566	-1.81249	1868.31	1157.83	1030.8	767.437
1558387_at	FLJ39198	3.5993	0.0243566	-1.88979	339.422	238.471	179.609	143.02
225239_at	---	-5.59041	0.0243566	2.59519	990.511	819.531	2570.57	1308.88
226621_at	---	-4.09702	0.0243566	2.40671	248.47	145.266	597.994	421.664
1558365_at	---	-3.73866	0.0243566	2.08429	54.6473	15.4126	113.901	80.0137
228679_at	---	4.93569	0.0243566	-2.51183	1545.43	939.339	615.258	667.441
222379_at	---	-2.55849	0.0243566	1.81858	87.244	23.5582	158.66	141.271
228273_at	---	-3.46603	0.0243566	1.93664	339.489	291.016	657.468	415.879
228108_at	---	5.41002	0.0243566	-1.9036	817.611	400.77	429.507	216.343
228640_at	---	4.87621	0.0243566	-1.91059	1178.58	503.933	616.867	455.475
229823_at	---	3.79635	0.0243566	-2.05676	385.164	283.434	187.267	164.731
213549_at	---	6.96661	0.0243566	-1.88901	647.157	222.622	342.59	151.155
223839_s_at	---	6.6045	0.0243566	-1.84343	958.756	394.222	520.094	174.69
209909_s_at	---	-2.04581	0.0370332	3.99737	52.9305	56.2788	211.583	393.254
1554281_at	---	5.11792	0.0243566	-2.61928	85.5015	69.0449	32.6431	13.8269
1568803_at	---	4.46736	0.0243566	-2.06006	224.119	167.5	108.792	46.1533
1558170_at	---	3.66406	0.0243566	-2.04375	709.166	518.036	346.992	329.644
1560048_at	---	-1.22683	0.0243566	2.04766	42.5303	11.3685	87.0874	185.001
1557051_s_at	---	-2.8145	0.0243566	2.14605	58.1885	56.661	124.876	113.392
236576_at	---	5.34021	0.0243566	-1.94627	268.202	150.26	137.804	57.2082
213841_at	---	4.75221	0.0243566	-1.8348	5411.97	2691.14	2949.63	1748.57
215469_at	---	4.4555	0.0243566	-2.03242	71.2265	47.7512	35.0451	21.8964
230913_at	---	4.37626	0.0243566	-1.84288	513.414	337.601	278.594	114.551
236575_at	---	4.32521	0.0243566	-1.91943	183.283	107.287	95.4884	66.9164
236373_at	---	3.70671	0.0243566	-1.98884	2197.87	1687.95	1105.1	846.405
220898_at	---	3.60996	0.0243566	-2.00354	743.509	590.029	371.097	296.869
241255_at	---	3.51491	0.0243566	-2.11682	383.541	357.204	181.187	130.607
243339_at	---	3.25382	0.0370332	-1.8915	308.677	259.501	163.192	124.509
229795_at	---	-2.75909	0.0243566	1.91746	94.4515	36.369	181.107	157.894
233786_at	---	-2.99154	0.0243566	2.08743	87.7051	119.36	183.079	136.783
240467_at	---	-3.4194	0.0243566	1.91103	41.0549	20.2422	78.457	53.7475

## Sheet: Sheet1
Alteration	Locus	GISTIC q value	Gene Symbols
GBM-Amp	12p13.32	0.0012072	C1R, C1RL, C1S
GBM-Amp	9p23	0.013446	GLIS3, HAUS6
GBM-Amp	9p23	0.013446	PLIN2
GBM-Amp	6p21.31	0.043032	CLIC1, F13A1
GBM-Amp	6p21.31	0.043032	HISTH1C, HISTH2BK, HLA-DQA1, HLA-DQB1, HLA-DRA, HLA-DRB1
OA-Amp	22q11.1	0.00046943	BCR
OA-Amp	22q11.1	0.00046943	MN1, RASL10A, SEZ6L
OA-Amp	22q11.1	0.00046943	SLC25A18
OA-Amp	8q24.22	0.00082296	FAM84B
OA-Amp	19p13.3	0.0030983	SHD, SLC1A6
OA-Amp	6p21.2	0.0087752	DAAM2
OA-Del	19q13.31	1.19e-06	EMP3
OA-Del	4q21.23	0.0085848	CCDC109B, CFI
OA-Del	4q21.23	0.0085848	ENPEP, HERC5, IBSP, MLF1IP, SEC24D, SPP1, TDO2
