# Supplementary material for: The Proneural Molecular Signature Is Enriched in Oligodendrogliomas and Predicts Improved Survival among Diffuse Gliomas
Source: PLoS One. 2010 Sep 3;5(9):e12548. doi: 10.1371/journal.pone.0012548 (PMC2933229; doi:10.1371/journal.pone.0012548)
Supplement: Table S9 — Integrated RNA and DNA Copy number analysis comparison of proneural oligodendrogliomas and proneural GBM samples. (0.15 MB XLS) [file pone.0012548.s009.xls]

## Sheet: REMBRANDT_data.survival-filt-pr
COLUMN_NAMES:Rank	Feature	Description	Score	GISTIC	Locus	GISTIC	Locus	Feature P	Feature P Low	Feature P High	FDR(BH)	Q Value	Bonferroni	maxT	FWER	Fold Change	PN-oligo Mean	PN-oligo Std	PN-GBM Mean	PN-GBM Std	k
1554	202912_at	ADM	-3.99569	GBM Amp	11p13			0.00199601	0	0.00298827	0.0237525	0.0177877	1	0.742	0.746	4.08615	225.03	339.752	919.508	831.648	1000
511	204490_s_at	CD44	-4.83634	GBM Amp	11p13			0.00199601	0	0.00298827	0.0237525	0.0177877	1	0.129	0.129	2.44396	282.97	119.232	691.568	417.168	1000
538	204489_s_at	CD44	-4.80612	GBM Amp	11p13			0.00199601	0	0.00298827	0.0237525	0.0177877	1	0.145	0.145	2.26766	858.67	456.508	1947.17	1079.04	1000
596	212014_x_at	CD44	-4.71761	GBM Amp	11p13			0.00199601	0	0.00298827	0.0237525	0.0177877	1	0.183	0.183	2.48997	303.829	116.516	756.527	477.892	1000
604	209835_x_at	CD44	-4.70655	GBM Amp	11p13			0.00199601	0	0.00298827	0.0237525	0.0177877	1	0.185	0.185	2.49187	326.04	140.644	812.451	511.495	1000
633	212063_at	CD44	-4.6678	GBM Amp	11p13			0.00199601	0	0.00298827	0.0237525	0.0177877	1	0.21	0.211	1.96653	1904.46	1279.48	3745.18	1647.14	1000
774	1557905_s_at	CD44	-4.51306	GBM Amp	11p13			0.00199601	0	0.00298827	0.0237525	0.0177877	1	0.285	0.286	2.15019	346.212	112.938	744.42	438.242	1000
1298	210916_s_at	CD44	-4.13955	GBM Amp	11p13			0.00199601	0	0.00298827	0.0237525	0.0177877	1	0.627	0.628	2.37038	232.986	82.9085	552.263	386.115	1000
2863	217523_at	CD44	-3.4606	GBM Amp	11p13			0.00199601	0	0.00298827	0.0237525	0.0177877	1	0.986	0.986	2.86011	108.113	54.1243	309.216	292.271	1000
726	201487_at	CTSC	-4.55833	GBM Amp	11p13			0.00199601	0	0.00298827	0.0237525	0.0177877	1	0.259	0.26	2.16972	281.878	138.359	611.597	347.103	1000
5159	225647_s_at	CTSC	-2.90356	GBM Amp	11p13			0.00199601	0	0.00298827	0.0237525	0.0177877	1	1	1	3.16613	53.3923	35.8486	169.047	200.517	1000
12878	225646_at	CTSC	-1.95872	GBM Amp	11p13			0.00199601	0	0.00298827	0.0237525	0.0177877	1	1	1	2.04221	79.8425	20.9139	163.055	215.8	1000
992	209356_x_at	EFEMP2	-4.33648	GBM Amp	11p13			0.00199601	0	0.00298827	0.0237525	0.0177877	1	0.434	0.435	1.88046	255.388	120.97	480.249	240.869	1000
3158	209448_at	HTATIP2	-3.37423	GBM Amp	11p13			0.00199601	0	0.00298827	0.0237525	0.0177877	1	0.997	0.997	1.81251	122.508	51.6934	222.047	143.021	1000
2865	225128_at	KDELC2	-3.45983	GBM Amp	11p13			0.00199601	0	0.00298827	0.0237525	0.0177877	1	0.986	0.986	1.89901	200.659	119.483	381.055	243.071	1000
178	200650_s_at	LDHA	-5.5472	GBM Amp	11p13			0.00199601	0	0.00298827	0.0237525	0.0177877	1	0.01	0.01	2.28817	3098.01	1950.42	7088.78	3219.61	1000
676	211340_s_at	MCAM	-4.61048	GBM Amp	11p13			0.00199601	0	0.00298827	0.0237525	0.0177877	1	0.237	0.238	1.83587	353.819	270.218	649.565	218.305	1000
4007	219607_s_at	MS4A4A	-3.15378	GBM Amp	11p13			0.00199601	0	0.00298827	0.0237525	0.0177877	1	1	1	2.28227	86.2008	83.3256	196.733	162.158	1000
1544	219666_at	MS4A6A	-4.00104	GBM Amp	11p13			0.00199601	0	0.00298827	0.0237525	0.0177877	1	0.738	0.742	1.85894	321.459	162.578	597.572	319.918	1000
1777	224356_x_at	MS4A6A	-3.88069	GBM Amp	11p13			0.00199601	0	0.00298827	0.0237525	0.0177877	1	0.822	0.825	1.86135	493.078	310.727	917.793	482.674	1000
6565	230550_at	MS4A6A	-2.66899	GBM Amp	11p13			0.00199601	0	0.00298827	0.0237525	0.0177877	1	1	1	1.90621	69.3649	26.6052	132.224	117.672	1000
1300	223343_at	MS4A7	-4.13925	GBM Amp	11p13			0.00199601	0	0.00298827	0.0237525	0.0177877	1	0.627	0.628	1.95889	408.244	224.038	799.704	437.907	1000
3574	202237_at	NNMT	-3.25767	GBM Amp	11p13			0.00199601	0	0.00298827	0.0237525	0.0177877	1	0.998	0.999	9.42888	98.2787	49.3278	926.658	1295.85	1000
3767	202238_s_at	NNMT	-3.21567	GBM Amp	11p13			0.00199601	0	0.00298827	0.0237525	0.0177877	1	1	1	4.84209	125.013	31.2123	605.324	761.1	1000
902	202458_at	PRSS23	-4.39648	GBM Amp	11p13			0.00199601	0	0.00298827	0.0237525	0.0177877	1	0.374	0.375	2.59855	281.315	223.393	731.011	481.116	1000
1065	226279_at	PRSS23	-4.28175	GBM Amp	11p13			0.00199601	0	0.00298827	0.0237525	0.0177877	1	0.489	0.491	2.41567	117.662	70.7618	284.231	187.828	1000
795	200986_at	SERPING1	-4.49793	GBM Amp	11p13			0.00199601	0	0.00298827	0.0237525	0.0177877	1	0.301	0.302	2.26221	279.986	147.839	633.388	377.817	1000
244	207714_s_at	SERPINH1	-5.34086	GBM Amp	11p13			0.00199601	0	0.00298827	0.0237525	0.0177877	1	0.033	0.033	2.09082	293.025	169.602	612.665	264.111	1000
968	213113_s_at	SLC43A3	-4.35216	GBM Amp	11p13			0.00199601	0	0.00298827	0.0237525	0.0177877	1	0.409	0.41	1.85235	259.923	129.922	481.467	231.643	1000
1328	209306_s_at	SWAP70	-4.12392	GBM Amp	11p13			0.00199601	0	0.00298827	0.0237525	0.0177877	1	0.641	0.643	1.92368	134.836	77.956	259.381	137.027	1000
3720	209307_at	SWAP70	-3.22749	GBM Amp	11p13			0.00199601	0	0.00298827	0.0237525	0.0177877	1	1	1	1.92889	86.0302	51.8968	165.942	117.265	1000
3904	232914_s_at	SYTL2	-3.18003	GBM Amp	11p13			0.00199601	0	0.00298827	0.0237525	0.0177877	1	1	1	1.84693	417.833	235.522	771.707	526.209	1000
5984	205547_s_at	TAGLN	-2.76408	GBM Amp	11p13			0.00598802	0.00121031	0.00939813	0.0464459	0.0256295	1	1	1	2.1449	405.046	475.564	868.786	740.33	998
8170	212533_at	WEE1	-2.45173	GBM Amp	11p13			0.00598802	0.00121031	0.00939813	0.0464459	0.0256295	1	1	1	1.99702	508.249	651.301	1014.99	875.23	998
7472	1568706_s_at	AVIL	-2.54257	GBM Amp	12p11.23			0.00199601	0	0.00298827	0.0237525	0.0177877	1	1	1	1.80322	63.5146	7.14536	114.531	102.108	1000
8626	238999_at	AVIL	-2.39373	GBM Amp	12p11.23			0.00199601	0	0.00298827	0.0237525	0.0177877	1	1	1	3.21888	153.807	32.3205	495.087	726.394	1000
14880	205539_at	AVIL	-1.78888	GBM Amp	12p11.23			0.00598802	0.00121031	0.00939813	0.0464459	0.0256295	1	1	1	3.17331	97.9395	99.9069	310.793	599.996	998
4118	226517_at	BCAT1	-3.12365	GBM Amp	12p11.23			0.00399202	0.000305	0.00638204	0.0357946	0.0205256	1	1	1	2.92229	262.482	374.829	767.048	751.162	999
5315	225285_at	BCAT1	-2.87484	GBM Amp	12p11.23			0.00399202	0.000305	0.00638204	0.0357946	0.0205256	1	1	1	2.44446	341.132	480.205	833.883	759.259	999
254	215049_x_at	CD163	-5.30262	GBM Amp	12p11.23			0.00199601	0	0.00298827	0.0237525	0.0177877	1	0.034	0.034	3.74747	318.265	301.682	1192.69	795.665	1000
319	203645_s_at	CD163	-5.17232	GBM Amp	12p11.23			0.00199601	0	0.00298827	0.0237525	0.0177877	1	0.052	0.052	3.71062	241.336	258.305	895.507	601.402	1000
3841	204252_at	CDK2	-3.19752	GBM Amp	12p11.23			0.00199601	0	0.00298827	0.0237525	0.0177877	1	1	1	1.99955	345.867	213.868	691.58	516.497	1000
598	201160_s_at	CSDA	-4.71303	GBM Amp	12p11.23			0.00199601	0	0.00298827	0.0237525	0.0177877	1	0.185	0.185	1.81051	1075.77	471.436	1947.69	842.194	1000
9602	205676_at	CYP27B1	-2.28261	GBM Amp	12p11.23			0.00598802	0.00121031	0.00939813	0.0464459	0.0256295	1	1	1	2.34619	137.952	68.0926	323.662	410.284	998
8717	228033_at	E2F7	-2.38235	GBM Amp	12p11.23			0.00199601	0	0.00298827	0.0237525	0.0177877	1	1	1	2.97525	48.568	47.6796	144.502	200.782	1000
4035	201324_at	EMP1	-3.14497	GBM Amp	12p11.23			0.00598802	0.00121031	0.00939813	0.0464459	0.0256295	1	1	1	1.90488	713.605	677.116	1359.33	850.616	998
9863	213861_s_at	FAM119B	-2.25351	GBM Amp	12p11.23			0.00399202	0.000305	0.00638204	0.0357946	0.0205256	1	1	1	3.10137	270.77	194.79	839.758	1275.42	999
2723	238756_at	GAS2L3	-3.50151	GBM Amp	12p11.23			0.00199601	0	0.00298827	0.0237525	0.0177877	1	0.983	0.983	2.72773	122.224	163.793	333.396	269.754	1000
1636	204222_s_at	GLIPR1	-3.95226	GBM Amp	12p11.23			0.00199601	0	0.00298827	0.0237525	0.0177877	1	0.777	0.78	2.16742	154.299	121.982	334.43	204.741	1000
2666	226142_at	GLIPR1	-3.51909	GBM Amp	12p11.23			0.00199601	0	0.00298827	0.0237525	0.0177877	1	0.981	0.981	2.07013	148.963	139.246	308.372	193.898	1000
2733	214085_x_at	GLIPR1	-3.49878	GBM Amp	12p11.23			0.00199601	0	0.00298827	0.0237525	0.0177877	1	0.983	0.983	2.22798	422.246	280.013	940.754	712.26	1000
2877	204221_x_at	GLIPR1	-3.4577	GBM Amp	12p11.23			0.00199601	0	0.00298827	0.0237525	0.0177877	1	0.986	0.986	1.84326	163.097	74.0782	300.63	191.51	1000
3604	226136_at	GLIPR1	-3.25155	GBM Amp	12p11.23			0.00199601	0	0.00298827	0.0237525	0.0177877	1	0.998	0.999	2.19582	227.705	167.445	499.998	399.441	1000
12468	226908_at	LRIG3	-1.99252	GBM Amp	12p11.23			0.00199601	0	0.00298827	0.0237525	0.0177877	1	1	1	2.01575	29.8344	8.4692	60.1387	77.1747	1000
5253	227833_s_at	MBD6	-2.88706	GBM Amp	12p11.23			0.00199601	0	0.00298827	0.0237525	0.0177877	1	1	1	2.2675	196.759	42.2967	446.152	438.815	1000
7995	226076_s_at	MBD6	-2.47554	GBM Amp	12p11.23			0.00399202	0.000305	0.00638204	0.0357946	0.0205256	1	1	1	2.00053	178.912	38.6153	357.919	367.064	999
9772	204027_s_at	METTL1	-2.26343	GBM Amp	12p11.23			0.00598802	0.00121031	0.00939813	0.0464459	0.0256295	1	1	1	1.80069	252.71	105.759	455.053	445.754	998
6151	202291_s_at	MGP	-2.7364	GBM Amp	12p11.23			0.00598802	0.00121031	0.00939813	0.0464459	0.0256295	1	1	1	2.44947	351.239	435.656	860.35	863.587	998
5335	218484_at	NDUFA4L2	-2.87121	GBM Amp	12p11.23			0.00199601	0	0.00298827	0.0237525	0.0177877	1	1	1	1.91831	206.846	104.147	396.793	324.004	1000
4649	205552_s_at	OAS1	-3.00817	GBM Amp	12p11.23			0.00199601	0	0.00298827	0.0237525	0.0177877	1	1	1	2.04807	54.799	21.1111	112.232	95.4743	1000
7494	215399_s_at	OS9	-2.53947	GBM Amp	12p11.23			0.00399202	0.000305	0.00638204	0.0357946	0.0205256	1	1	1	2.18473	779.965	126.117	1704.01	1851.92	999
4531	204004_at	PAWR	-3.03428	GBM Amp	12p11.23			0.00199601	0	0.00298827	0.0237525	0.0177877	1	1	1	2.05833	226.034	176.174	465.251	369.303	1000
5840	226223_at	PAWR	-2.78851	GBM Amp	12p11.23			0.00399202	0.000305	0.00638204	0.0357946	0.0205256	1	1	1	2.24559	98.5242	92.0268	221.245	208.511	999
6816	203227_s_at	TSPAN31	-2.62941	GBM Amp	12p11.23			0.00399202	0.000305	0.00638204	0.0357946	0.0205256	1	1	1	2.16085	1368.11	667.516	2956.27	3020.47	999
15403	227678_at	XRCC6BP1	-1.74629	GBM Amp	12p11.23			0.00199601	0	0.00298827	0.0237525	0.0177877	1	1	1	4.88574	49.407	17.9073	241.39	560.34	1000
1266	212067_s_at	C1R	-4.15835	GBM Amp	12p13.32			0.00199601	0	0.00298827	0.0237525	0.0177877	1	0.605	0.606	2.58693	317.444	218.365	821.207	585.522	1000
818	218983_at	C1RL	-4.47418	GBM Amp	12p13.32			0.00199601	0	0.00298827	0.0237525	0.0177877	1	0.321	0.322	2.72794	64.068	22.5383	174.774	124.52	1000
755	208747_s_at	C1S	-4.52859	GBM Amp	12p13.32			0.00199601	0	0.00298827	0.0237525	0.0177877	1	0.281	0.282	2.08422	588.443	342.115	1226.44	648.806	1000
1209	1555229_a_at	C1S	-4.19588	GBM Amp	12p13.32			0.00199601	0	0.00298827	0.0237525	0.0177877	1	0.569	0.571	2.23905	96.9602	63.1968	217.098	134.425	1000
1117	204174_at	ALOX5AP	-4.243	GBM Amp	13q33.2			0.00199601	0	0.00298827	0.0237525	0.0177877	1	0.525	0.526	2.08762	437.855	291.599	914.075	508.367	1000
6933	44790_s_at	C13orf18	-2.6123	GBM Amp	13q33.2			0.00199601	0	0.00298827	0.0237525	0.0177877	1	1	1	2.28361	62.0605	53.1468	141.722	147.93	1000
1547	211980_at	COL4A1	-3.99912	GBM Amp	13q33.2			0.00199601	0	0.00298827	0.0237525	0.0177877	1	0.738	0.742	2.83298	882.925	1150.52	2501.31	1783.97	1000
3469	211981_at	COL4A1	-3.28292	GBM Amp	13q33.2			0.00199601	0	0.00298827	0.0237525	0.0177877	1	0.997	0.998	2.78381	636.954	864.206	1773.16	1583.52	1000
2180	211964_at	COL4A2	-3.70386	GBM Amp	13q33.2			0.00199601	0	0.00298827	0.0237525	0.0177877	1	0.923	0.926	2.91043	1011.94	1342.21	2945.17	2370.55	1000
5581	211966_at	COL4A2	-2.83034	GBM Amp	13q33.2			0.00399202	0.000305	0.00638204	0.0357946	0.0205256	1	1	1	2.40648	381.209	523.535	917.372	842.804	999
9371	211430_s_at	F7	-2.30811	GBM Amp	13q33.2			0.00199601	0	0.00298827	0.0237525	0.0177877	1	1	1	5.23331	137.451	45.1515	719.325	1284.82	1000
10303	205422_s_at	ITGBL1	-2.20586	GBM Amp	13q33.2			0.00199601	0	0.00298827	0.0237525	0.0177877	1	1	1	1.96481	26.2697	2.35519	51.615	58.5492	1000
5	227013_at	LATS2	-7.3697	GBM Amp	13q33.2			0.00199601	0	0.00298827	0.0237525	0.0177877	1	0	0	2.81918	142.446	72.6757	401.581	166.897	1000
74	223380_s_at	LATS2	-6.0972	GBM Amp	13q33.2			0.00199601	0	0.00298827	0.0237525	0.0177877	1	0.001	0.001	2.26367	136.799	55.8564	309.668	135.518	1000
21406	206235_at	LIG4	-1.32321	GBM Amp	13q33.2			0.00598802	0.00121031	0.00939813	0.0464459	0.0256295	1	1	1	1.81292	219.625	61.654	398.162	685.746	998
11349	211341_at	POU4F1	-2.09677	GBM Amp	13q33.2			0.00598802	0.00121031	0.00939813	0.0464459	0.0256295	1	1	1	2.11002	36.7141	10.9813	77.4674	98.6099	998
96	223592_s_at	RNF135	-5.97099	GBM Amp	17q11.2			0.00199601	0	0.00298827	0.0237525	0.0177877	1	0.001	0.001	2.32952	211.055	125.078	491.657	211.445	1000
132	223591_at	RNF135	-5.72332	GBM Amp	17q11.2			0.00199601	0	0.00298827	0.0237525	0.0177877	1	0.006	0.006	2.09178	154.168	82.1371	322.486	130.406	1000
1208	220088_at	C5AR1	-4.19647	GBM Amp	19p13.3	Oligo Del	19q13.31	0.00199601	0	0.00298827	0.0237525	0.0177877	1	0.569	0.571	2.08673	133.804	52.977	279.214	170.108	1000
5246	231729_s_at	CAPS	-2.88821	GBM Amp	19p13.3	Oligo Amp	19p13.3	0.00199601	0	0.00298827	0.0237525	0.0177877	1	1	1	1.92118	92.6068	21.5337	177.914	149.35	1000
69	203729_at	EMP3	-6.1214	GBM Amp	19p13.3	Oligo Del	19q13.31	0.00199601	0	0.00298827	0.0237525	0.0177877	1	0.001	0.001	4.20378	220.178	166.595	925.579	568.074	1000
1233	203240_at	FCGBP	-4.17538	GBM Amp	19p13.3			0.00199601	0	0.00298827	0.0237525	0.0177877	1	0.593	0.594	2.34165	543.499	471.602	1272.68	782.473	1000
6371	221577_x_at	GDF15	-2.70002	GBM Amp	19p13.3	Oligo Amp	19p13.3	0.00199601	0	0.00298827	0.0237525	0.0177877	1	1	1	2.03981	67.1741	64.2346	137.022	118.523	1000
3825	242517_at	KISS1R	-3.20042	GBM Amp	19p13.3	Oligo Amp	19p13.3	0.00199601	0	0.00298827	0.0237525	0.0177877	1	1	1	2.92881	57.0078	38.5533	166.965	171.706	1000
1364	218232_at	C1QA	-4.10096	GBM Amp	1p36.23	Oligo Del	1p36.12	0.00199601	0	0.00298827	0.0237525	0.0177877	1	0.655	0.658	2.07081	795.698	475.196	1647.74	968.953	1000
2626	202953_at	C1QB	-3.53103	GBM Amp	1p36.23	Oligo Del	1p36.12	0.00199601	0	0.00298827	0.0237525	0.0177877	1	0.978	0.978	1.99842	590.917	437.342	1180.9	755.286	1000
2134	225353_s_at	C1QC	-3.72648	GBM Amp	1p36.23	Oligo Del	1p36.12	0.00199601	0	0.00298827	0.0237525	0.0177877	1	0.908	0.91	1.82976	1461.61	828.669	2674.4	1481.87	1000
4752	208727_s_at	CDC42	-2.98566	GBM Amp	1p36.23	Oligo Del	1p36.12	0.00199601	0	0.00298827	0.0237525	0.0177877	1	1	1	2.24687	569.901	300.853	1280.5	1182.89	1000
5905	204415_at	IFI6	-2.77772	GBM Amp	1p36.23	Oligo Del	1p36.12	0.00199601	0	0.00298827	0.0237525	0.0177877	1	1	1	2.17748	356.897	185.241	777.138	753.143	1000
7944	205483_s_at	ISG15	-2.48168	GBM Amp	1p36.23			0.00199601	0	0.00298827	0.0237525	0.0177877	1	1	1	2.72702	812.58	737.72	2215.92	2805.66	1000
405	213340_s_at	KIAA0495	-5.01712	GBM Amp	1p36.23			0.00199601	0	0.00298827	0.0237525	0.0177877	1	0.081	0.081	2.45612	219.413	129.105	538.907	303.139	1000
912	218918_at	MAN1C1	-4.39128	GBM Amp	1p36.23	Oligo Del	1p36.12	0.00199601	0	0.00298827	0.0237525	0.0177877	1	0.377	0.378	1.96241	433.891	267.313	851.469	420.773	1000
1133	204879_at	PDPN	-4.23376	GBM Amp	1p36.23			0.00199601	0	0.00298827	0.0237525	0.0177877	1	0.537	0.538	2.97108	107.102	61.4433	318.209	248.145	1000
1546	221898_at	PDPN	-3.99917	GBM Amp	1p36.23			0.00199601	0	0.00298827	0.0237525	0.0177877	1	0.738	0.742	4.68666	150.377	274.417	704.764	662.161	1000
1812	226658_at	PDPN	-3.86296	GBM Amp	1p36.23			0.00199601	0	0.00298827	0.0237525	0.0177877	1	0.831	0.834	3.25808	164.508	160.609	535.982	468.477	1000
6182	203649_s_at	PLA2G2A	-2.73236	GBM Amp	1p36.23			0.00199601	0	0.00298827	0.0237525	0.0177877	1	1	1	3.21121	166.416	26.6984	534.396	686.286	1000
5666	1562415_a_at	SPOCD1	-2.81683	GBM Amp	1p36.23	Oligo Del	1p36.12	0.00199601	0	0.00298827	0.0237525	0.0177877	1	1	1	2.01047	142.332	95.5228	286.153	245.694	1000
5995	235417_at	SPOCD1	-2.76218	GBM Amp	1p36.23	Oligo Del	1p36.12	0.00399202	0.000305	0.00638204	0.0357946	0.0205256	1	1	1	2.36481	310.793	310.89	734.967	731.169	999
835	226388_at	TCEA3	-4.46336	GBM Amp	1p36.23	Oligo Del	1p36.12	0.00199601	0	0.00298827	0.0237525	0.0177877	1	0.326	0.327	2.04682	53.1788	12.4935	108.847	62.5918	1000
3148	223660_at	ADORA3	-3.37629	GBM Amp	1q31.2			0.00199601	0	0.00298827	0.0237525	0.0177877	1	0.997	0.997	1.95267	313.809	207.459	612.766	410.951	1000
2835	219649_at	ALG6	-3.46853	GBM Amp	1q31.2	Oligo Del	1p36.12	0.00199601	0	0.00298827	0.0237525	0.0177877	1	0.984	0.984	2.08576	395.172	116.515	824.234	621.95	1000
4113	202672_s_at	ATF3	-3.1246	GBM Amp	1q31.2			0.00399202	0.000305	0.00638204	0.0357946	0.0205256	1	1	1	2.02612	302.325	357.178	612.547	390.683	999
98	205173_x_at	CD58	-5.96575	GBM Amp	1q31.2			0.00199601	0	0.00298827	0.0237525	0.0177877	1	0.001	0.001	2.38144	123.766	70.1836	294.742	131.733	1000
161	216942_s_at	CD58	-5.60283	GBM Amp	1q31.2			0.00199601	0	0.00298827	0.0237525	0.0177877	1	0.01	0.01	2.02368	54.8527	24.0097	111.004	46.2936	1000
482	211744_s_at	CD58	-4.87433	GBM Amp	1q31.2			0.00199601	0	0.00298827	0.0237525	0.0177877	1	0.12	0.12	2.00928	92.1244	39.4323	185.104	90.5384	1000
3150	202870_s_at	CDC20	-3.37608	GBM Amp	1q31.2	Oligo Del	1p36.12	0.00199601	0	0.00298827	0.0237525	0.0177877	1	0.997	0.997	2.29984	126.854	147.394	291.744	210.64	1000
814	204159_at	CDKN2C	-4.4782	GBM Amp	1q31.2	Oligo Del	1p36.12	0.00199601	0	0.00298827	0.0237525	0.0177877	1	0.318	0.319	2.33832	606.582	572.923	1418.38	766.624	1000
3224	207828_s_at	CENPF	-3.35055	GBM Amp	1q31.2			0.00399202	0.000305	0.00638204	0.0357946	0.0205256	1	0.997	0.998	1.96688	461.517	482.391	907.748	521.631	999
3564	215388_s_at	CFH	-3.2592	GBM Amp	1q31.2			0.00199601	0	0.00298827	0.0237525	0.0177877	1	0.998	0.999	2.27438	86.3548	32.6233	196.403	169.641	1000
1060	209395_at	CHI3L1	-4.28656	GBM Amp	1q31.2			0.00199601	0	0.00298827	0.0237525	0.0177877	1	0.48	0.482	6.7774	616.702	1221.79	4179.63	4092.65	1000
1538	209396_s_at	CHI3L1	-4.00347	GBM Amp	1q31.2			0.00199601	0	0.00298827	0.0237525	0.0177877	1	0.738	0.741	7.2413	584.844	1128	4235.03	4536.51	1000
2239	37892_at	COL11A1	-3.67826	GBM Amp	1q31.2			0.00199601	0	0.00298827	0.0237525	0.0177877	1	0.93	0.932	2.62656	304.819	395.089	800.626	587.856	1000
2858	204320_at	COL11A1	-3.46184	GBM Amp	1q31.2			0.00598802	0.00121031	0.00939813	0.0464459	0.0256295	1	0.986	0.986	1.83872	179.351	132.437	329.777	186.656	998
42	218924_s_at	CTBS	-6.43676	GBM Amp	1q31.2	Oligo Del	1p36.12	0.00199601	0	0.00298827	0.0237525	0.0177877	1	0	0	1.87746	125.341	47.1438	235.323	76.058	1000
5472	215506_s_at	DIRAS3	-2.84911	GBM Amp	1q31.2	Oligo Del	1p36.12	0.00199601	0	0.00298827	0.0237525	0.0177877	1	1	1	2.43579	167.727	274.712	408.548	352.76	1000
45	204646_at	DPYD	-6.42508	GBM Amp	1q31.2	Oligo Del	1p36.12	0.00199601	0	0.00298827	0.0237525	0.0177877	1	0	0	3.7323	113.872	77.4585	425.004	236.841	1000
3952	218552_at	ECHDC2	-3.1683	GBM Amp	1q31.2	Oligo Del	1p36.12	0.00199601	0	0.00298827	0.0237525	0.0177877	1	1	1	1.86157	316.593	109.804	589.361	427.685	1000
454	223000_s_at	F11R	-4.9249	GBM Amp	1q31.2			0.00199601	0	0.00298827	0.0237525	0.0177877	1	0.099	0.099	2.24502	117.553	69.4014	263.91	138.015	1000
6214	226482_s_at	F11R	-2.72637	GBM Amp	1q31.2			0.00199601	0	0.00298827	0.0237525	0.0177877	1	1	1	2.46414	134.467	82.8272	331.347	360.567	1000
84	217967_s_at	FAM129A	-6.0508	GBM Amp	1q31.2			0.00199601	0	0.00298827	0.0237525	0.0177877	1	0.001	0.001	2.70704	139.483	78.8328	377.586	187.646	1000
406	217966_s_at	FAM129A	-5.01704	GBM Amp	1q31.2			0.00199601	0	0.00298827	0.0237525	0.0177877	1	0.081	0.081	2.08926	83.524	19.4341	174.503	90.7915	1000
3111	1554899_s_at	FCER1G	-3.38609	GBM Amp	1q31.2			0.00199601	0	0.00298827	0.0237525	0.0177877	1	0.997	0.997	1.94871	183.899	129.534	358.366	235.354	1000
611	203561_at	FCGR2A	-4.69846	GBM Amp	1q31.2			0.00199601	0	0.00298827	0.0237525	0.0177877	1	0.19	0.191	1.83477	74.4337	27.128	136.569	62.8422	1000
2101	204006_s_at	FCGR3A	-3.73673	GBM Amp	1q31.2			0.00199601	0	0.00298827	0.0237525	0.0177877	1	0.903	0.905	2.67596	137.361	129.096	367.572	291.791	1000
608	231577_s_at	GBP1	-4.70158	GBM Amp	1q31.2	Oligo Del	1p36.12	0.00199601	0	0.00298827	0.0237525	0.0177877	1	0.188	0.189	3.63249	169.284	143.107	614.922	465.777	1000
708	202269_x_at	GBP1	-4.57361	GBM Amp	1q31.2	Oligo Del	1p36.12	0.00199601	0	0.00298827	0.0237525	0.0177877	1	0.253	0.254	3.02455	183.177	112.595	554.03	400.805	1000
967	202270_at	GBP1	-4.35275	GBM Amp	1q31.2	Oligo Del	1p36.12	0.00199601	0	0.00298827	0.0237525	0.0177877	1	0.409	0.41	3.40276	172.937	153.451	588.465	466.703	1000
2141	202748_at	GBP2	-3.72314	GBM Amp	1q31.2	Oligo Del	1p36.12	0.00199601	0	0.00298827	0.0237525	0.0177877	1	0.914	0.916	2.62724	266.943	195.105	701.323	568.316	1000
5455	242907_at	GBP2	-2.85257	GBM Amp	1q31.2	Oligo Del	1p36.12	0.00199601	0	0.00298827	0.0237525	0.0177877	1	1	1	2.72022	157.446	146.147	428.288	465.867	1000
7232	223434_at	GBP3	-2.57401	GBM Amp	1q31.2	Oligo Del	1p36.12	0.00598802	0.00121031	0.00939813	0.0464459	0.0256295	1	1	1	1.88574	159.606	156.725	300.977	241.807	998
1224	203925_at	GCLM	-4.18452	GBM Amp	1q31.2	Oligo Del	1p36.12	0.00199601	0	0.00298827	0.0237525	0.0177877	1	0.577	0.579	1.8259	269.315	117.392	491.741	249.527	1000
657	212294_at	GNG12	-4.63635	GBM Amp	1q31.2	Oligo Del	1p36.12	0.00199601	0	0.00298827	0.0237525	0.0177877	1	0.223	0.224	1.9123	610.44	439.698	1167.35	466.955	1000
322	207157_s_at	GNG5	-5.16632	GBM Amp	1q31.2	Oligo Del	1p36.12	0.00199601	0	0.00298827	0.0237525	0.0177877	1	0.053	0.053	1.807	1436.86	843.465	2596.4	855.396	1000
2864	228949_at	GPR177	-3.46003	GBM Amp	1q31.2	Oligo Del	1p36.12	0.00199601	0	0.00298827	0.0237525	0.0177877	1	0.986	0.986	1.83802	394.035	341.325	724.245	377.025	1000
675	203283_s_at	HS2ST1	-4.61347	GBM Amp	1q31.2	Oligo Del	1p36.12	0.00199601	0	0.00298827	0.0237525	0.0177877	1	0.235	0.236	1.81031	185.822	110.126	336.395	133.573	1000
3818	213418_at	HSPA6	-3.20214	GBM Amp	1q31.2			0.00199601	0	0.00298827	0.0237525	0.0177877	1	1	1	3.585	95.274	49.0892	341.557	389.671	1000
617	214453_s_at	IFI44	-4.68831	GBM Amp	1q31.2	Oligo Del	1p36.12	0.00199601	0	0.00298827	0.0237525	0.0177877	1	0.194	0.195	2.26835	304.96	185.716	691.757	385.939	1000
3563	214059_at	IFI44	-3.26065	GBM Amp	1q31.2	Oligo Del	1p36.12	0.00199601	0	0.00298827	0.0237525	0.0177877	1	0.998	0.999	1.90532	170.081	68.317	324.06	232.786	1000
582	205176_s_at	ITGB3BP	-4.73398	GBM Amp	1q31.2	Oligo Del	1p36.12	0.00199601	0	0.00298827	0.0237525	0.0177877	1	0.172	0.172	2.08224	239.579	137.46	498.862	250.286	1000
484	208935_s_at	LGALS8	-4.87004	GBM Amp	1q31.2			0.00199601	0	0.00298827	0.0237525	0.0177877	1	0.122	0.122	1.99407	70.3081	28.4087	140.199	68.5503	1000
745	208934_s_at	LGALS8	-4.53436	GBM Amp	1q31.2			0.00199601	0	0.00298827	0.0237525	0.0177877	1	0.279	0.28	1.85906	98.8291	59.3977	183.729	79.047	1000
12605	215228_at	NHLH2	-1.98023	GBM Amp	1q31.2			0.00199601	0	0.00298827	0.0237525	0.0177877	1	1	1	3.24571	56.3734	13.3455	182.972	325.764	1000
7067	238133_at	NTNG1	-2.59622	GBM Amp	1q31.2			0.00598802	0.00121031	0.00939813	0.0464459	0.0256295	1	1	1	2.0341	78.0155	49.9562	158.691	151.915	998
2983	213125_at	OLFML2B	-3.42166	GBM Amp	1q31.2			0.00199601	0	0.00298827	0.0237525	0.0177877	1	0.993	0.993	1.86243	209.117	110.443	389.466	249.642	1000
229	201896_s_at	PSRC1	-5.37489	GBM Amp	1q31.2			0.00199601	0	0.00298827	0.0237525	0.0177877	1	0.024	0.024	2.55727	650.983	419.588	1664.74	884.233	1000
2226	212588_at	PTPRC	-3.68419	GBM Amp	1q31.2			0.00199601	0	0.00298827	0.0237525	0.0177877	1	0.928	0.93	1.83295	180.612	134.212	331.053	169.464	1000
668	200872_at	S100A10	-4.62599	GBM Amp	1q31.2			0.00199601	0	0.00298827	0.0237525	0.0177877	1	0.228	0.229	1.91907	1692.66	837.75	3248.33	1539.53	1000
80	200660_at	S100A11	-6.07364	GBM Amp	1q31.2			0.00199601	0	0.00298827	0.0237525	0.0177877	1	0.001	0.001	2.26385	347.405	197.718	786.474	322.665	1000
423	203186_s_at	S100A4	-4.97801	GBM Amp	1q31.2			0.00199601	0	0.00298827	0.0237525	0.0177877	1	0.086	0.086	1.88276	221.871	90.4374	417.731	183.312	1000
579	217728_at	S100A6	-4.73872	GBM Amp	1q31.2			0.00199601	0	0.00298827	0.0237525	0.0177877	1	0.169	0.169	1.99431	1913.54	1163.8	3816.19	1758.13	1000
3559	202917_s_at	S100A8	-3.26154	GBM Amp	1q31.2			0.00199601	0	0.00298827	0.0237525	0.0177877	1	0.998	0.999	3.10021	166.93	172.65	517.517	525.542	1000
2447	202234_s_at	SLC16A1	-3.59621	GBM Amp	1q31.2			0.00199601	0	0.00298827	0.0237525	0.0177877	1	0.964	0.964	1.92446	163.53	62.7884	314.708	206.746	1000
283	204342_at	SLC25A24	-5.23798	GBM Amp	1q31.2			0.00199601	0	0.00298827	0.0237525	0.0177877	1	0.042	0.042	2.13304	166.934	77.3605	356.077	170.41	1000
2926	235763_at	SLC44A5	-3.44127	GBM Amp	1q31.2	Oligo Del	1p36.12	0.00399202	0.000305	0.00638204	0.0357946	0.0205256	1	0.987	0.987	2.25024	99.2178	87.0848	223.264	166.198	999
281	200916_at	TAGLN2	-5.24145	GBM Amp	1q31.2			0.00199601	0	0.00298827	0.0237525	0.0177877	1	0.041	0.041	2.33511	538.652	294.682	1257.81	647.235	1000
589	210978_s_at	TAGLN2	-4.72581	GBM Amp	1q31.2			0.00199601	0	0.00298827	0.0237525	0.0177877	1	0.177	0.177	2.16952	441.956	204.518	958.832	526.345	1000
763	228121_at	TGFB2	-4.52185	GBM Amp	1q31.2			0.00199601	0	0.00298827	0.0237525	0.0177877	1	0.281	0.282	3.90069	350.439	324.12	1366.95	1108.4	1000
8498	220407_s_at	TGFB2	-2.40693	GBM Amp	1q31.2			0.00199601	0	0.00298827	0.0237525	0.0177877	1	1	1	2.89127	106.803	54.5671	308.795	425.081	1000
11951	209908_s_at	TGFB2	-2.04113	GBM Amp	1q31.2			0.00199601	0	0.00298827	0.0237525	0.0177877	1	1	1	2.66642	67.9412	19.4738	181.16	282.289	1000
3184	202195_s_at	TMED5	-3.36378	GBM Amp	1q31.2	Oligo Del	1p36.12	0.00199601	0	0.00298827	0.0237525	0.0177877	1	0.997	0.997	1.82496	91.5484	54.051	167.072	103.599	1000
9283	204407_at	TTF2	-2.31784	GBM Amp	1q31.2			0.00199601	0	0.00298827	0.0237525	0.0177877	1	1	1	2.73508	36.1569	14.3917	98.8918	137.399	1000
2648	208079_s_at	AURKA	-3.52377	GBM Amp	20p12.1			0.00199601	0	0.00298827	0.0237525	0.0177877	1	0.98	0.98	1.85436	89.8263	76.8413	166.57	86.804	1000
4158	227654_at	C20orf175	-3.11436	GBM Amp	20p12.1			0.00199601	0	0.00298827	0.0237525	0.0177877	1	1	1	1.80306	103.588	27.9069	186.774	133.855	1000
4013	202878_s_at	CD93	-3.1532	GBM Amp	20p12.1			0.00199601	0	0.00298827	0.0237525	0.0177877	1	1	1	1.89093	320.996	310.387	606.98	368.233	1000
1331	221024_s_at	SLC2A10	-4.12214	GBM Amp	20p12.1			0.00199601	0	0.00298827	0.0237525	0.0177877	1	0.642	0.644	2.15971	112.327	87.7229	242.595	140.404	1000
5457	203739_at	ZNF217	-2.85195	GBM Amp	20p12.1			0.00199601	0	0.00298827	0.0237525	0.0177877	1	1	1	1.97284	79.3239	25.3532	156.494	136.067	1000
9185	227188_at	C21orf63	-2.32945	GBM Amp	21q22.11	Oligo Amp	21q22.11	0.00199601	0	0.00298827	0.0237525	0.0177877	1	1	1	2.1851	87.0359	46.2098	190.182	221.905	1000
432	209213_at	CBR1	-4.96778	GBM Amp	21q22.11	Oligo Amp	21q22.11	0.00199601	0	0.00298827	0.0237525	0.0177877	1	0.087	0.087	2.30467	319.629	220.324	736.639	379.164	1000
4503	209156_s_at	COL6A2	-3.03947	GBM Amp	21q22.11	Oligo Amp	21q22.11	0.00199601	0	0.00298827	0.0237525	0.0177877	1	1	1	4.51351	160.156	152.423	722.867	933.953	1000
1439	202086_at	MX1	-4.05214	GBM Amp	21q22.11	Oligo Amp	21q22.11	0.00199601	0	0.00298827	0.0237525	0.0177877	1	0.701	0.704	2.53554	464.047	248.804	1176.61	868.156	1000
15298	204205_at	APOBEC3G	-1.75579	GBM Amp	22q11.1	Oligo Amp	22q11.1	0.00199601	0	0.00298827	0.0237525	0.0177877	1	1	1	2.12318	62.265	17.9139	132.2	202.457	1000
1057	203665_at	HMOX1	-4.2872	GBM Amp	22q11.1	Oligo Amp	22q11.1	0.00199601	0	0.00298827	0.0237525	0.0177877	1	0.479	0.481	3.14498	295.181	149.423	928.337	740.907	1000
5747	204017_at	KDELR3	-2.80436	GBM Amp	22q11.1	Oligo Amp	22q11.1	0.00199601	0	0.00298827	0.0237525	0.0177877	1	1	1	1.91612	74.7666	21.922	143.262	122.963	1000
1000	201105_at	LGALS1	-4.32445	GBM Amp	22q11.1	Oligo Amp	22q11.1	0.00199601	0	0.00298827	0.0237525	0.0177877	1	0.446	0.447	1.84505	2226.98	1504.88	4108.88	1756.08	1000
2967	212543_at	AIM1	-3.42711	GBM Amp	6p12.3			0.00199601	0	0.00298827	0.0237525	0.0177877	1	0.991	0.991	2.04876	76.9793	28.0349	157.712	117.43	1000
247	225171_at	ARHGAP18	-5.32577	GBM Amp	6p12.3			0.00199601	0	0.00298827	0.0237525	0.0177877	1	0.034	0.034	1.9058	108.089	47.8384	205.996	83.2314	1000
6707	226545_at	CD109	-2.64723	GBM Amp	6p12.3			0.00399202	0.000305	0.00638204	0.0357946	0.0205256	1	1	1	1.96993	121.401	79.4982	239.151	215.19	999
6202	213436_at	CNR1	-2.72869	GBM Amp	6p12.3			0.00598802	0.00121031	0.00939813	0.0464459	0.0256295	1	1	1	2.27346	354.237	590.704	805.343	653.52	998
5973	225664_at	COL12A1	-2.76575	GBM Amp	6p12.3			0.00199601	0	0.00298827	0.0237525	0.0177877	1	1	1	2.08598	73.7125	44.6792	153.763	141.981	1000
5114	208096_s_at	COL21A1	-2.91171	GBM Amp	6p12.3			0.00199601	0	0.00298827	0.0237525	0.0177877	1	1	1	1.99484	66.0907	27.0333	131.84	112.534	1000
8326	221766_s_at	FAM46A	-2.42857	GBM Amp	6p12.3			0.00399202	0.000305	0.00638204	0.0357946	0.0205256	1	1	1	1.86661	311.315	297.434	581.103	498.98	999
1416	209708_at	MOXD1	-4.06733	GBM Amp	6p12.3			0.00199601	0	0.00298827	0.0237525	0.0177877	1	0.68	0.683	2.23401	154.464	47.087	345.075	235.16	1000
2092	1554474_a_at	MOXD1	-3.74077	GBM Amp	6p12.3			0.00199601	0	0.00298827	0.0237525	0.0177877	1	0.9	0.902	2.62094	79.5389	28.3107	208.466	173.878	1000
298	216841_s_at	SOD2	-5.2129	GBM Amp	6p12.3			0.00199601	0	0.00298827	0.0237525	0.0177877	1	0.045	0.045	3.45162	112.521	94.4413	388.38	256.052	1000
522	215223_s_at	SOD2	-4.82381	GBM Amp	6p12.3			0.00199601	0	0.00298827	0.0237525	0.0177877	1	0.133	0.133	3.03281	193.048	145.899	585.478	393.421	1000
3759	215078_at	SOD2	-3.21633	GBM Amp	6p12.3			0.00199601	0	0.00298827	0.0237525	0.0177877	1	1	1	1.8655	23.8634	2.59824	44.5172	32.6597	1000
583	210512_s_at	VEGFA	-4.73395	GBM Amp	6p12.3			0.00199601	0	0.00298827	0.0237525	0.0177877	1	0.172	0.172	4.19376	1175.88	1413.1	4931.35	3839.3	1000
1587	211527_x_at	VEGFA	-3.97096	GBM Amp	6p12.3			0.00199601	0	0.00298827	0.0237525	0.0177877	1	0.761	0.764	5.69116	355.437	571.488	2022.85	2078.19	1000
1646	212171_x_at	VEGFA	-3.94584	GBM Amp	6p12.3			0.00199601	0	0.00298827	0.0237525	0.0177877	1	0.783	0.786	3.8819	725.223	677.548	2815.24	2630.87	1000
2195	210513_s_at	VEGFA	-3.69881	GBM Amp	6p12.3			0.00199601	0	0.00298827	0.0237525	0.0177877	1	0.925	0.928	4.04237	348.866	398.358	1410.24	1418.42	1000
4	208659_at	CLIC1	-7.48949	GBM Amp	6p21.31			0.00199601	0	0.00298827	0.0237525	0.0177877	1	0	0	2.69816	467.866	194.533	1262.38	511.71	1000
4604	203305_at	F13A1	-3.01681	GBM Amp	6p21.31			0.00199601	0	0.00298827	0.0237525	0.0177877	1	1	1	2.23701	170.055	73.3888	380.414	349.341	1000
2550	224840_at	FKBP5	-3.55965	GBM Amp	6p21.31			0.00199601	0	0.00298827	0.0237525	0.0177877	1	0.971	0.971	1.93115	1104.51	850.96	2132.98	1257.8	1000
8576	209398_at	HIST1H1C	-2.39986	GBM Amp	6p21.31			0.00199601	0	0.00298827	0.0237525	0.0177877	1	1	1	2.66892	83.9822	26.8873	224.141	296.811	1000
2289	209911_x_at	HIST1H2BD	-3.6599	GBM Amp	6p21.31			0.00199601	0	0.00298827	0.0237525	0.0177877	1	0.937	0.938	1.85959	209.641	105.771	389.847	232.258	1000
6538	208579_x_at	HIST1H2BK	-2.67345	GBM Amp	6p21.31			0.00199601	0	0.00298827	0.0237525	0.0177877	1	1	1	2.1995	184.002	82.4346	404.714	414.347	1000
957	211990_at	HLA-DPA1	-4.35977	GBM Amp	6p21.31			0.00199601	0	0.00298827	0.0237525	0.0177877	1	0.407	0.408	2.07962	1898.83	1565.52	3948.84	1938.36	1000
1821	211991_s_at	HLA-DPA1	-3.85838	GBM Amp	6p21.31			0.00199601	0	0.00298827	0.0237525	0.0177877	1	0.832	0.835	2.09115	593.509	500.119	1241.11	727.486	1000
4289	213537_at	HLA-DPA1	-3.08754	GBM Amp	6p21.31			0.00199601	0	0.00298827	0.0237525	0.0177877	1	1	1	1.98907	154.988	108.112	308.281	233.654	1000
1152	201137_s_at	HLA-DPB1	-4.22722	GBM Amp	6p21.31			0.00199601	0	0.00298827	0.0237525	0.0177877	1	0.544	0.545	1.89161	1034.2	685.878	1956.3	924.621	1000
4693	212671_s_at	HLA-DQA1	-2.99908	GBM Amp	6p21.31			0.00199601	0	0.00298827	0.0237525	0.0177877	1	1	1	2.33768	269.12	290.336	629.118	553.295	1000
1273	209823_x_at	HLA-DQB1	-4.15368	GBM Amp	6p21.31			0.00199601	0	0.00298827	0.0237525	0.0177877	1	0.61	0.611	2.05095	199.952	111.502	410.09	237.579	1000
1999	212998_x_at	HLA-DQB1	-3.7796	GBM Amp	6p21.31			0.00199601	0	0.00298827	0.0237525	0.0177877	1	0.881	0.882	2.04271	197.786	213.597	404.02	200.852	1000
871	210982_s_at	HLA-DRA	-4.42692	GBM Amp	6p21.31			0.00199601	0	0.00298827	0.0237525	0.0177877	1	0.345	0.346	2.16615	1076.29	941.375	2331.41	1170.44	1000
1118	208894_at	HLA-DRA	-4.24283	GBM Amp	6p21.31			0.00199601	0	0.00298827	0.0237525	0.0177877	1	0.526	0.527	2.15553	1422.85	1235.49	3067.01	1632.21	1000
620	209312_x_at	HLA-DRB1	-4.68579	GBM Amp	6p21.31			0.00199601	0	0.00298827	0.0237525	0.0177877	1	0.197	0.198	2.20925	1732.68	1250.52	3827.93	1981.89	1000
641	204670_x_at	HLA-DRB1	-4.65719	GBM Amp	6p21.31			0.00199601	0	0.00298827	0.0237525	0.0177877	1	0.213	0.214	2.03594	1762.03	1076.13	3587.39	1747.34	1000
691	208306_x_at	HLA-DRB1	-4.59152	GBM Amp	6p21.31			0.00199601	0	0.00298827	0.0237525	0.0177877	1	0.246	0.247	1.96598	1932.54	1181.06	3799.34	1778.91	1000
806	215193_x_at	HLA-DRB1	-4.48442	GBM Amp	6p21.31			0.00199601	0	0.00298827	0.0237525	0.0177877	1	0.312	0.313	2.13868	1536.72	1169.36	3286.56	1687.51	1000
1465	213572_s_at	SERPINB1	-4.03572	GBM Amp	6p21.31			0.00199601	0	0.00298827	0.0237525	0.0177877	1	0.71	0.713	1.83303	65.4405	32.2291	119.954	62.4504	1000
3253	203484_at	SEC61G	-3.34226	GBM Amp	7p11.2			0.00199601	0	0.00298827	0.0237525	0.0177877	1	0.997	0.998	1.98296	1509.65	638.857	2993.57	2189.44	1000
2486	202998_s_at	LOXL2	-3.57934	GBM Amp	8p23.2			0.00199601	0	0.00298827	0.0237525	0.0177877	1	0.966	0.966	1.91678	287.776	200.726	551.603	329.422	1000
773	214770_at	MSR1	-4.51349	GBM Amp	8p23.2			0.00199601	0	0.00298827	0.0237525	0.0177877	1	0.284	0.285	2.30107	85.4677	52.1522	196.667	116.498	1000
5593	209122_at	ADFP	-2.82945	GBM Amp	9p23			0.00399202	0.000305	0.00638204	0.0357946	0.0205256	1	1	1	2.91165	219.178	199.363	638.168	733.376	999
1893	229435_at	GLIS3	-3.82021	GBM Amp	9p23	Oligo Del	9p24.1	0.00199601	0	0.00298827	0.0237525	0.0177877	1	0.859	0.861	2.71904	198.695	163.351	540.258	431.469	1000
1732	201645_at	TNC	-3.90422	GBM Amp	9q33.1			0.00199601	0	0.00298827	0.0237525	0.0177877	1	0.809	0.812	1.95046	939.334	590.628	1832.13	1037.39	1000
7159	241272_at	TNC	-2.58471	GBM Amp	9q33.1			0.00199601	0	0.00298827	0.0237525	0.0177877	1	1	1	1.88413	167.37	94.093	315.346	279.33	1000
369	213503_x_at	ANXA2	-5.08078			Oligo Del	15q11.2	0.00199601	0	0.00298827	0.0237525	0.0177877	1	0.068	0.068	2.59593	847.649	681.736	2200.44	1210.62	1000
376	210427_x_at	ANXA2	-5.07395			Oligo Del	15q11.2	0.00199601	0	0.00298827	0.0237525	0.0177877	1	0.071	0.071	2.56316	967.733	760.064	2480.45	1357.06	1000
395	201590_x_at	ANXA2	-5.03082			Oligo Del	15q11.2	0.00199601	0	0.00298827	0.0237525	0.0177877	1	0.077	0.077	2.5847	961.966	753.111	2486.39	1387.98	1000
5188	203755_at	BUB1B	-2.89881			Oligo Del	15q11.2	0.00598802	0.00121031	0.00939813	0.0464459	0.0256295	1	1	1	1.92648	296.06	346.716	570.354	367.585	998
5215	203963_at	CA12	-2.89398			Oligo Del	15q11.2	0.00598802	0.00121031	0.00939813	0.0464459	0.0256295	1	1	1	1.96254	376.236	303.748	738.379	576.346	998
8408	230360_at	GLDN	-2.41799			Oligo Del	15q11.2	0.00399202	0.000305	0.00638204	0.0357946	0.0205256	1	1	1	1.99181	399.487	249.382	795.701	804.723	999
600	200791_s_at	IQGAP1	-4.71184			Oligo Del	15q11.2	0.00199601	0	0.00298827	0.0237525	0.0177877	1	0.185	0.185	2.05105	586.438	229.997	1202.81	633.985	1000
998	210840_s_at	IQGAP1	-4.32604			Oligo Del	15q11.2	0.00199601	0	0.00298827	0.0237525	0.0177877	1	0.446	0.447	1.91974	359.102	104.513	689.383	377.725	1000
7619	204698_at	ISG20	-2.52376			Oligo Del	15q11.2	0.00199601	0	0.00298827	0.0237525	0.0177877	1	1	1	1.93902	77.6886	20.6632	150.64	146.209	1000
151	217995_at	SQRDL	-5.62715			Oligo Del	15q11.2	0.00199601	0	0.00298827	0.0237525	0.0177877	1	0.009	0.009	1.88463	187.956	64.9673	354.227	138.82	1000
2882	201110_s_at	THBS1	-3.45672			Oligo Del	15q11.2	0.00199601	0	0.00298827	0.0237525	0.0177877	1	0.986	0.986	4.36354	39.5434	43.851	172.549	192.174	1000
5340	201109_s_at	THBS1	-2.87052			Oligo Del	15q11.2	0.00199601	0	0.00298827	0.0237525	0.0177877	1	1	1	2.27324	57.4088	30.4554	130.504	126.907	1000
4610	204304_s_at	PROM1	-3.01488			Oligo Del	4p15.32	0.00199601	0	0.00298827	0.0237525	0.0177877	1	1	1	3.95636	215.206	346.218	851.431	1029.79	1000
2480	205850_s_at	GABRB3	3.58062			Oligo Del	15q11.2	0.00199601	0	0.00298827	0.0237525	0.0177877	1	0.966	0.966	-1.90063	123.021	78.564	64.7262	43.3178	0
2435	212451_at	KIAA0256	3.59869			Oligo Del	15q11.2	0.00399202	0.000305	0.00638204	0.0357946	0.0205256	1	0.964	0.964	-1.9031	559.386	369.896	293.934	174.064	1
1567	236333_at	MMD2	3.98725			Oligo Del	7p22.1	0.00199601	0	0.00298827	0.0237525	0.0177877	1	0.745	0.749	-2.29494	1265.88	835.68	551.597	516.694	0
1418	218430_s_at	RFXDC2	4.06401			Oligo Del	15q11.2	0.00199601	0	0.00298827	0.0237525	0.0177877	1	0.687	0.69	-1.80927	189.351	110.47	104.656	37.1054	0
1225	229724_at	GABRB3	4.18109			Oligo Del	15q11.2	0.00399202	0.000305	0.00638204	0.0357946	0.0205256	1	0.586	0.588	-2.11034	1338.67	722.024	634.342	560.576	1
1039	227690_at	GABRB3	4.30019			Oligo Del	15q11.2	0.00199601	0	0.00298827	0.0237525	0.0177877	1	0.466	0.468	-2.11715	595.058	290.524	281.065	264.662	0
530	1552439_s_at	MEGF11	4.8138			Oligo Del	15q11.2	0.00199601	0	0.00298827	0.0237525	0.0177877	1	0.14	0.14	-2.82256	744.597	528.191	263.802	180.808	0
280	227830_at	GABRB3	5.24236			Oligo Del	15q11.2	0.00199601	0	0.00298827	0.0237525	0.0177877	1	0.041	0.041	-2.2262	779.872	372.136	350.316	249.091	0
273	219196_at	SCG3	5.25716			Oligo Del	15q11.2	0.00199601	0	0.00298827	0.0237525	0.0177877	1	0.035	0.035	-2.57549	1580.81	877.507	613.791	504.066	0
9	229875_at	ZDHHC22	7.20964			Oligo Del	14q24.2	0.00199601	0	0.00298827	0.0237525	0.0177877	1	0	0	-2.17807	1096.24	388.145	503.306	231.185	0
2478	235388_at	CHD9	3.58092			Oligo Amp	16q23.1	0.00199601	0	0.00298827	0.0237525	0.0177877	1	0.966	0.966	-2.32579	182.684	139.392	78.5468	78.7487	0
53	226913_s_at	SOX8	6.32142			Oligo Amp	16q23.1	0.00199601	0	0.00298827	0.0237525	0.0177877	1	0.001	0.001	-2.02375	8156.84	2842.8	4030.55	2124.11	0
239	231798_at	NOG	5.35515			Oligo Amp	17q24.2	0.00199601	0	0.00298827	0.0237525	0.0177877	1	0.03	0.03	-2.93247	235.104	150.135	80.1726	58.7207	0
1068	219230_at	TMEM100	4.2784			Oligo Amp	17q24.2	0.00199601	0	0.00298827	0.0237525	0.0177877	1	0.49	0.492	-2.23178	2543.46	1447.22	1139.65	1047.57	0
588	227845_s_at	SHD	4.72811	GBM Amp	19p13.3	Oligo Amp	19p13.3	0.00199601	0	0.00298827	0.0237525	0.0177877	1	0.176	0.176	-2.22259	1434.68	824.875	645.501	414.146	0
1130	1554593_s_at	SLC1A6	4.23472	GBM Amp	19p13.3	Oligo Amp	19p13.3	0.00199601	0	0.00298827	0.0237525	0.0177877	1	0.537	0.538	-2.44801	185.036	113.768	75.5863	82.7755	0
3308	1554592_a_at	SLC1A6	3.32734	GBM Amp	19p13.3	Oligo Amp	19p13.3	0.00399202	0.000305	0.00638204	0.0357946	0.0205256	1	0.997	0.998	-1.86445	89.439	51.1311	47.9707	43.7521	1
143	202315_s_at	BCR	5.65161	GBM Amp	22q11.1	Oligo Amp	22q11.1	0.00199601	0	0.00298827	0.0237525	0.0177877	1	0.008	0.008	-2.05581	1116.35	483.941	543.023	278	0
528	217223_s_at	BCR	4.81702	GBM Amp	22q11.1	Oligo Amp	22q11.1	0.00199601	0	0.00298827	0.0237525	0.0177877	1	0.14	0.14	-1.80427	728.723	321.774	403.887	184.689	0
822	226602_s_at	BCR	4.47259	GBM Amp	22q11.1	Oligo Amp	22q11.1	0.00199601	0	0.00298827	0.0237525	0.0177877	1	0.321	0.322	-1.81616	1374.96	658.713	757.074	379.048	0
1046	204493_at	BID	4.29784	GBM Amp	22q11.1	Oligo Amp	22q11.1	0.00199601	0	0.00298827	0.0237525	0.0177877	1	0.47	0.472	-1.85949	592.351	293.956	318.555	187.909	0
209	205330_at	MN1	5.44119	GBM Amp	22q11.1	Oligo Amp	22q11.1	0.00199601	0	0.00298827	0.0237525	0.0177877	1	0.021	0.021	-2.58453	587.536	327.077	227.328	164.389	0
76	209511_at	POLR2F	6.09291	GBM Amp	22q11.1	Oligo Amp	22q11.1	0.00199601	0	0.00298827	0.0237525	0.0177877	1	0.001	0.001	-1.89911	1833.02	693.951	965.197	369.023	0
364	213609_s_at	SEZ6L	5.08694	GBM Amp	22q11.1	Oligo Amp	22q11.1	0.00199601	0	0.00298827	0.0237525	0.0177877	1	0.066	0.066	-2.39405	1232.75	731.875	514.923	287.265	0
472	231650_s_at	SEZ6L	4.88938	GBM Amp	22q11.1	Oligo Amp	22q11.1	0.00199601	0	0.00298827	0.0237525	0.0177877	1	0.116	0.116	-2.78971	1220.11	863.114	437.362	247.147	0
1082	240709_at	SEZ6L	4.26853	GBM Amp	22q11.1	Oligo Amp	22q11.1	0.00199601	0	0.00298827	0.0237525	0.0177877	1	0.499	0.501	-2.78435	249.405	194.759	89.5737	75.0638	0
2636	223605_at	SLC25A18	3.52876	GBM Amp	22q11.1	Oligo Amp	22q11.1	0.00199601	0	0.00298827	0.0237525	0.0177877	1	0.978	0.978	-1.88896	1328.35	781.106	703.216	565.89	0
772	225864_at	FAM84B	4.5136			Oligo Amp	8q24.21	0.00199601	0	0.00298827	0.0237525	0.0177877	1	0.284	0.285	-2.29701	1979.91	1244.42	861.951	580.398	0
7788	1553392_at	EFCAB3	-2.50267			Oligo Amp	17q24.2	0.00399202	0.000305	0.00638204	0.0357946	0.0205256	1	1	1	1.82395	24.461	2.04897	44.6156	41.0221	999
5996	227697_at	SOCS3	-2.76173			Oligo Amp	17q24.2	0.00199601	0	0.00298827	0.0237525	0.0177877	1	1	1	3.35504	102.301	160.588	343.223	420.607	1000
5399	214321_at	NOV	-2.85953			Oligo Amp	8q24.21	0.00199601	0	0.00298827	0.0237525	0.0177877	1	1	1	1.91948	71.5007	36.5737	137.244	112.502	1000
3690	1569003_at	TMEM49	-3.23278			Oligo Amp	17q24.2	0.00199601	0	0.00298827	0.0237525	0.0177877	1	1	1	2.81691	293.87	336.587	827.806	785.622	1000
3255	204485_s_at	TOM1L1	-3.34184			Oligo Amp	17q24.2	0.00199601	0	0.00298827	0.0237525	0.0177877	1	0.997	0.998	2.82785	41.2079	7.53619	116.53	114.726	1000
2222	202855_s_at	SLC16A3	-3.68628			Oligo Amp	17q24.2	0.00199601	0	0.00298827	0.0237525	0.0177877	1	0.928	0.93	2.82682	74.0143	38.1729	209.225	183.837	1000
1891	217546_at	MT1M	-3.82049			Oligo Amp	16q23.1	0.00199601	0	0.00298827	0.0237525	0.0177877	1	0.859	0.861	2.12818	226.881	172.323	482.843	304.264	1000
1121	213353_at	ABCA5	-4.2424			Oligo Amp	17q24.2	0.00199601	0	0.00298827	0.0237525	0.0177877	1	0.527	0.528	2.50387	63.9871	47.2853	160.215	107.518	1000
910	230022_at	MGC34761	-4.39316			Oligo Amp	16q23.1	0.00199601	0	0.00298827	0.0237525	0.0177877	1	0.375	0.376	1.80774	52.8073	10.4515	95.4617	48.6031	1000
722	202856_s_at	SLC16A3	-4.55926			Oligo Amp	17q24.2	0.00199601	0	0.00298827	0.0237525	0.0177877	1	0.259	0.26	3.09419	97.1456	64.5376	300.587	219.964	1000
4692	1554784_at	CNTN1	3.00013	GBM Amp	12p11.23			0.00399202	0.000305	0.00638204	0.0357946	0.0205256	1	1	1	-1.85144	448.012	353.309	241.981	145.591	1
4280	221173_at	USH1C	3.08897	GBM Amp	11p13			0.00199601	0	0.00298827	0.0237525	0.0177877	1	1	1	-1.82593	230.147	176.366	126.044	65.2539	0
3885	1558010_s_at	SLC1A2	3.18616	GBM Amp	11p13			0.00399202	0.000305	0.00638204	0.0357946	0.0205256	1	1	1	-2.08547	1011.85	780.656	485.19	463.934	1
3708	204271_s_at	EDNRB	3.22935	GBM Amp	13q33.2			0.00399202	0.000305	0.00638204	0.0357946	0.0205256	1	1	1	-2.05802	1944.87	1617.35	945.022	605.811	1
3581	224520_s_at	BEST3	3.25541	GBM Amp	12p11.23			0.00399202	0.000305	0.00638204	0.0357946	0.0205256	1	0.998	0.999	-2.27837	653.381	574.247	286.775	248.6	1
3467	212793_at	DAAM2	3.28302	GBM Amp	6p12.3			0.00399202	0.000305	0.00638204	0.0357946	0.0205256	1	0.997	0.998	-1.92868	2847.41	1898.76	1476.35	1267.01	1
3431	222898_s_at	DLL3	3.29203	GBM Amp	19p13.3			0.00598802	0.00121031	0.00939813	0.0464459	0.0256295	1	0.997	0.998	-2.15018	1103.04	866.787	513	474.128	2
2994	204260_at	CHGB	3.41826	GBM Amp	20p12.1			0.00199601	0	0.00298827	0.0237525	0.0177877	1	0.995	0.995	-2.15819	678.483	446.036	314.376	365.177	0
2879	237696_at	TRIM34	3.4575	GBM Amp	11p13			0.00399202	0.000305	0.00638204	0.0357946	0.0205256	1	0.986	0.986	-2.06708	409.311	296.146	198.014	160.765	1
2849	210341_at	MYT1	3.46437	GBM Amp	20p12.1			0.00199601	0	0.00298827	0.0237525	0.0177877	1	0.986	0.986	-1.89615	782.964	481.683	412.923	328.819	0
2629	229818_at	SVOP	3.53097	GBM Amp	12p11.23			0.00199601	0	0.00298827	0.0237525	0.0177877	1	0.978	0.978	-1.89534	280.711	186.565	148.106	91.5933	0
2474	205567_at	CHST1	3.58196	GBM Amp	11p13			0.00199601	0	0.00298827	0.0237525	0.0177877	1	0.966	0.966	-1.86684	1254.68	713.855	672.088	523.22	0
2442	211184_s_at	USH1C	3.59793	GBM Amp	11p13			0.00399202	0.000305	0.00638204	0.0357946	0.0205256	1	0.964	0.964	-2.30106	390.998	323.483	169.921	114.648	1
2416	236862_at	GOPC	3.6055	GBM Amp	6p12.3			0.00199601	0	0.00298827	0.0237525	0.0177877	1	0.959	0.959	-2.10767	106.975	86.1349	50.755	17.13	0
1916	223315_at	NTN4	3.81097	GBM Amp	12p11.23			0.00199601	0	0.00298827	0.0237525	0.0177877	1	0.862	0.864	-2.23412	170.847	131.731	76.4718	42.9597	0
1795	227401_at	IL17D	3.87104	GBM Amp	13q33.2			0.00199601	0	0.00298827	0.0237525	0.0177877	1	0.825	0.828	-1.95252	1907.98	1152.98	977.19	650.472	0
1692	219537_x_at	DLL3	3.92316	GBM Amp	19p13.3			0.00199601	0	0.00298827	0.0237525	0.0177877	1	0.796	0.799	-1.93578	2940.79	1565.09	1519.17	1193.22	0
1648	213308_at	SHANK2	3.94402	GBM Amp	11p13			0.00199601	0	0.00298827	0.0237525	0.0177877	1	0.786	0.789	-1.89631	566.712	297.343	298.85	219.3	0
1494	219743_at	HEY2	4.02347	GBM Amp	6p12.3			0.00199601	0	0.00298827	0.0237525	0.0177877	1	0.718	0.722	-1.89808	989.285	588.517	521.202	265.495	0
1458	219090_at	SLC24A3	4.04101	GBM Amp	20p12.1			0.00199601	0	0.00298827	0.0237525	0.0177877	1	0.706	0.709	-1.90993	908.464	535.621	475.654	255.259	0
1360	239272_at	MMP28	4.10276	GBM Amp	17q11.2			0.00199601	0	0.00298827	0.0237525	0.0177877	1	0.652	0.655	-1.95905	94.1325	61.2008	48.0501	15.3908	0
1330	1553720_a_at	FAM123A	4.12262	GBM Amp	13q33.2			0.00199601	0	0.00298827	0.0237525	0.0177877	1	0.642	0.644	-1.85551	1026.01	552.161	552.952	307.607	0
1305	207723_s_at	KLRC3	4.13541	GBM Amp	12p11.23			0.00199601	0	0.00298827	0.0237525	0.0177877	1	0.628	0.629	-2.17253	457.101	257.728	210.4	196.364	0
1213	212850_s_at	LRP4	4.19386	GBM Amp	11p13			0.00199601	0	0.00298827	0.0237525	0.0177877	1	0.571	0.573	-1.81038	2527.34	1425.73	1396.03	490.308	0
1176	239293_at	NRSN1	4.21301	GBM Amp	6p21.31			0.00199601	0	0.00298827	0.0237525	0.0177877	1	0.551	0.553	-2.06502	646.398	381.755	313.022	210.688	0
1155	217359_s_at	NCAM1	4.22573	GBM Amp	11p13			0.00199601	0	0.00298827	0.0237525	0.0177877	1	0.544	0.545	-1.83734	670.942	311.523	365.17	239.34	0
843	229799_s_at	NCAM1	4.45496	GBM Amp	11p13			0.00199601	0	0.00298827	0.0237525	0.0177877	1	0.328	0.329	-2.1029	931.266	455.062	442.847	379.816	0
792	204072_s_at	FRY	4.49854	GBM Amp	13q33.2			0.00199601	0	0.00298827	0.0237525	0.0177877	1	0.301	0.302	-1.84603	1185.61	584.849	642.247	318.448	0
782	214825_at	LOC728215	4.50547	GBM Amp	13q33.2			0.00199601	0	0.00298827	0.0237525	0.0177877	1	0.295	0.296	-1.94262	351.032	172.358	180.7	114.121	0
711	230496_at	FAM123A	4.56885	GBM Amp	13q33.2			0.00199601	0	0.00298827	0.0237525	0.0177877	1	0.256	0.257	-1.82079	3780.26	1654.85	2076.17	1179.79	0
671	230869_at	LOC728215	4.62012	GBM Amp	13q33.2			0.00199601	0	0.00298827	0.0237525	0.0177877	1	0.231	0.232	-2.60567	417.584	257.793	160.26	163.273	0
663	238663_x_at	GRIA4	4.6295	GBM Amp	11p13			0.00199601	0	0.00298827	0.0237525	0.0177877	1	0.227	0.228	-2.11043	508.139	280.375	240.775	151.154	0
554	208464_at	GRIA4	4.78442	GBM Amp	11p13			0.00199601	0	0.00298827	0.0237525	0.0177877	1	0.152	0.152	-1.98386	402.208	205.851	202.74	103.743	0
464	209437_s_at	SPON1	4.90134	GBM Amp	11p13			0.00199601	0	0.00298827	0.0237525	0.0177877	1	0.112	0.112	-2.15759	692.763	361.34	321.081	208.399	0
334	207447_s_at	MGAT4C	5.1526	GBM Amp	12p11.23			0.00199601	0	0.00298827	0.0237525	0.0177877	1	0.055	0.055	-3.30983	130.468	92.803	39.4183	33.4801	0
332	205289_at	BMP2	5.15609	GBM Amp	20p12.1			0.00199601	0	0.00298827	0.0237525	0.0177877	1	0.055	0.055	-2.9384	1235.26	760.644	420.386	423.45	0
243	203146_s_at	GABBR1	5.34471	GBM Amp	6p21.31			0.00199601	0	0.00298827	0.0237525	0.0177877	1	0.032	0.032	-2.06206	4567.46	1984.62	2215	1355.27	0
242	213994_s_at	SPON1	5.34812	GBM Amp	11p13			0.00199601	0	0.00298827	0.0237525	0.0177877	1	0.03	0.03	-2.79182	742.398	447.861	265.919	208.338	0
225	226487_at	C12orf34	5.389	GBM Amp	12p11.23			0.00199601	0	0.00298827	0.0237525	0.0177877	1	0.022	0.022	-2.00485	825.542	382.166	411.773	186.035	0
196	228882_at	TUB	5.49073	GBM Amp	11p13			0.00199601	0	0.00298827	0.0237525	0.0177877	1	0.016	0.016	-1.80206	1138.34	415.604	631.687	284.665	0
194	219668_at	GDAP1L1	5.50762	GBM Amp	20p12.1			0.00199601	0	0.00298827	0.0237525	0.0177877	1	0.016	0.016	-1.92492	486.63	216.632	252.806	93.4462	0
154	205290_s_at	BMP2	5.62227	GBM Amp	20p12.1			0.00199601	0	0.00298827	0.0237525	0.0177877	1	0.009	0.009	-2.75595	798.406	427.125	289.702	254.213	0
128	209436_at	SPON1	5.75848	GBM Amp	11p13			0.00199601	0	0.00298827	0.0237525	0.0177877	1	0.005	0.005	-2.15136	2197.02	973.986	1021.23	559.65	0
119	221623_at	BCAN	5.7892	GBM Amp	1q31.2			0.00199601	0	0.00298827	0.0237525	0.0177877	1	0.004	0.004	-2.38044	777.298	382.236	326.536	197.276	0
117	213993_at	SPON1	5.81201	GBM Amp	11p13			0.00199601	0	0.00298827	0.0237525	0.0177877	1	0.004	0.004	-3.30417	576.313	358.011	174.42	142.058	0
99	214930_at	SLITRK5	5.96537	GBM Amp	13q33.2			0.00199601	0	0.00298827	0.0237525	0.0177877	1	0.001	0.001	-1.95423	518.814	182.638	265.483	140.667	0
65	232059_at	DSCAML1	6.15162	GBM Amp	11p13			0.00199601	0	0.00298827	0.0237525	0.0177877	1	0.001	0.001	-2.16651	488.633	219.032	225.539	92.6141	0
8	203608_at	ALDH5A1	7.21459	GBM Amp	6p21.31			0.00199601	0	0.00298827	0.0237525	0.0177877	1	0	0	-1.98083	1849.85	581.188	933.877	380.329	0
6	203620_s_at	FCHSD2	7.28434	GBM Amp	11p13			0.00199601	0	0.00298827	0.0237525	0.0177877	1	0	0	-1.81633	1545.01	438.621	850.625	282.752	0
3855	220330_s_at	SAMSN1	-3.19485	GBM Del	21p11.2			0.00199601	0	0.00298827	0.0237525	0.0177877	1	1	1	2.00655	156.36	138.217	313.743	218.112	1000
