# Supplementary material for: The Proneural Molecular Signature Is Enriched in Oligodendrogliomas and Predicts Improved Survival among Diffuse Gliomas
Source: PLoS One. 2010 Sep 3;5(9):e12548. doi: 10.1371/journal.pone.0012548 (PMC2933229; doi:10.1371/journal.pone.0012548)
Supplement: Table S10 — Gene Ontology analysis of the 129 genes differentially expressed between proneural oligodendrogliomas and the all other oligodendrogliomas. (0.02 MB XLS) [file pone.0012548.s010.xls]

## Sheet: Sheet1
Function Annotation	p-value	# Molecules	Molecules
differentiation of astrocytes	2.39e-06	5	BMP2, DLL3, NOG, OLIG2, SOX6
generation of neurons	4.49e-05	4	HEY2, NOG, OLIG1, OLIG2
neurogenesis	4.83e-05	12	BMP2, BMPR1A, DLL3, DSCAM, EPHB1, HEY2, MYCN, NOG, NTRK2, OLIG1, OLIG2, RP11-35N6.1
contact growth inhibition	9.95e-05	6	BMP2, BMPR1A, CAMK2A, IFI16, LATS2, MYCN
cell death	0.000272	32	ADCYAP1R1, ALCAM, BID, BMP2, BMPR1A, CALCRL, CAMK2A, CDHR1, CFH, EGLN1, ENO1, ETS1, GRIA4, GRIK2, HSPB6, IFI16, KCNIP1, LAMP2, LATS2, MAML2, MYC, MYCN, NOG, NTRK2, RASL10A, RASSF4, RGN, SOX6, TFAP2A, TNFRSF21, TRIB2, ZEB1
development of blood vessel	0.000815	10	BMP2, BMPR1A, CHD7, CXCL14, EGLN1, ETS1, HEY2, MYC, NOG, NTRK2
benign tumor	0.00115	11	ADCYAP1R1, ALCAM, CALCRL, CFH, CXCL14, MN1, MTHFD2, MYC, NTRK2, RAP2B, ZEB1
